# Supplementary material
Source: PubMed Central journal article supplement (PMC11072238)
Supplement: 18_2021_3981_MOESM1_ESM.pdf [file 18_2021_3981_MOESM1_ESM.pdf]

## Supplementary Material

### A survey of substrate specificity among Auxiliary Activity Family 5 Copper

#### Radical Oxidases

*Maria E. Cleveland*<sup>1,2,3</sup>, *Yann Mathieu*<sup>1,3</sup>, *David Ribeaucourt*<sup>4,5,6</sup>, *Mireille Haon*<sup>4</sup>, *Paul Mulyk*<sup>2</sup>,  
*Jason E. Hein*<sup>2</sup>, *Michael Lafond*<sup>5</sup>, *Jean-Guy Berrin*<sup>4</sup>, *Harry Brumer*<sup>1,2,3,7,8\*</sup>

<sup>1</sup>Michael Smith Laboratories, University of British Columbia, 2185 East Mall, Vancouver, BC, V6T 1Z4, Canada;

<sup>2</sup>Department of Chemistry, University of British Columbia, 2036 Main Mall, Vancouver, BC, V6T 1Z1, Canada;

<sup>3</sup>BioProducts Institute, University of British Columbia, 2385 East Mall, Vancouver, BC, V6T 1Z4, Canada

<sup>4</sup>INRAE, Aix Marseille Univ, UMR 1163 Biodiversité et Biotechnologie Fongiques, 13009 Marseille, France

<sup>5</sup>Aix Marseille Univ, CNRS, Centrale Marseille, iSm2, Marseille, France

<sup>6</sup>V. Mane Fils, 620 route de Grasse, 06620 Le Bar sur Loup, France

<sup>7</sup>Department of Biochemistry and Molecular Biology, University of British Columbia, 2350 Health Sciences Mall, Vancouver, BC, V6T 1Z3, Canada;

<sup>8</sup>Department of Botany, University of British Columbia, 3200 University Boulevard, Vancouver, BC, V6T 1Z4, Canada

#### Corresponding Author

\*Harry Brumer: [brumer@mssl.ubc.ca](mailto:brumer@mssl.ubc.ca)

Supplementary Tables

**Table S1. Key amino acid residues in selected AA5\_2 genes compared to other characterized members.**

| Enzyme                 | Organism                         | GenBank/JGI mycosm Accession | Active Site Amino Acids |                                                |      |      |      |      |      | Distal Amino Acids   | Modularity      |
|------------------------|----------------------------------|------------------------------|-------------------------|------------------------------------------------|------|------|------|------|------|----------------------|-----------------|
|                        |                                  |                              | Radical Stabilization   | Substrate Recognition/Active Site Cavity Shape |      |      |      |      |      | Catalytic Efficiency |                 |
| <i>FgrGalOx</i>        | <i>Fusarium graminearum</i>      | AAO95371                     | W290                    | F194                                           | Q326 | Y329 | R330 | Q406 | P463 | C383                 | CBM 32-CAT      |
| <i>CgrAlcOx</i>        | <i>Colletorichum graminicola</i> | EFQ30446                     | F                       | W                                              | G    | F    | M    | T    | L    | C                    | CAT             |
| <i>CgrAAO</i>          | <i>Colletorichum graminicola</i> | EFQ27661                     | Y                       | F                                              | E    | W    | R    | T    | V    | C                    | PAN 1-CAT       |
| <i>FgrAAO</i>          | <i>Fusarium graminearum</i>      | XP_011322138                 | W                       | F                                              | E    | Y    | K    | Q    | P    | N                    | CBM 32-CAT      |
| Y1                     | <i>Eurotium rubrum</i>           | XP_040635673                 | W                       | F                                              | K    | W    | R    | D    | P    | Y                    | CBM32-CAT       |
| Y11                    | <i>Melanomma pulvis-pyrius</i>   | KAF2798557                   | W                       | F                                              | G    | F    | R    | A    | P    | N                    | CBM32-CBM32-CAT |
| Y12                    | <i>Niesslia exilis</i>           | jgi Nieex1 772836            | W                       | F                                              | E    | W    | R    | D    | A    | S                    | CBM32-CAT       |
| Y13<br><i>PfeGalOx</i> | <i>Penicillium fellutanum</i>    | jgi Penfe1 382062            | W                       | Y                                              | Q    | Y    | R    | Q    | P    | S                    | CBM32-CAT       |
| Y14<br><i>PhuRafOx</i> | <i>Pseudozyma hubeiensis</i>     | XP_012186969                 | Y                       | F                                              | A    | W    | R    | S    | G    | C                    | UNK-CAT         |
| Y15                    | <i>Setosphaeria turcica</i>      | XP_008020456                 | W                       | F                                              | Q    | L    | R    | V    | G    | C                    | UNK-CAT         |
| Y16<br><i>StoAA5</i>   | <i>Stagonospora sp.</i>          | OAK97814                     | W                       | Y                                              | E    | F    | R    | D    | G    | C                    | CAT             |
| Y17                    | <i>Talaromyces marneffei</i>     | XP_002148539                 | F                       | F                                              | G    | Y    | R    | N    | V    | T                    | UNK-CAT         |
| Y18<br><i>AsyAlcOx</i> | <i>Aspergillus sydowii</i>       | XP_040706357                 | F                       | Y                                              | H    | D    | R    | V    | P    | C                    | UNK-CBM32-CAT   |
| Y19                    | <i>Torpedospora radiata</i>      | jgi Torra1 425635            | W                       | Y                                              | E    | F    | R    | Q    | P    | C                    | CBM32-CAT       |
| Y2<br><i>UmaRafOx</i>  | <i>Ustilago maydis</i>           | XP_011389156                 | Y                       | F                                              | A    | W    | R    | S    | G    | C                    | UNK-CAT         |

|                               |                                                              |                        |   |   |   |   |   |   |   |   |                     |
|-------------------------------|--------------------------------------------------------------|------------------------|---|---|---|---|---|---|---|---|---------------------|
| Y20                           | Metarhizium<br>acidum                                        | XP_00781297<br>1       | W | Y | Q | Y | R | Q | P | N | CBM32-CAT           |
| Y21                           | Leptosphaeria<br>maculans                                    | XP_00384132<br>8       | W | F | S | F | H | G | G | C | CAT                 |
| Y22                           | Acremonium<br>strictum                                       | jgi Acrst1 1377<br>707 | W | F | E | S | K | R | P | N | CBM32-CAT           |
| Y23<br>CcaAA5                 | Corynespora<br>cassiicola                                    | PSN67470               | W | A | A | N | E | H | G | C | CAT                 |
| Y24                           | Myrothecium<br>inundatum                                     | jgi Myrin1 117<br>638  | W | F | A | Y | K | A | N | C | CBM32-CAT           |
| Y25                           | Niesslia exilis                                              | jgi Nieex1 192<br>818  | W | F | Q | F | R | Q | P | C | CBM32-CAT           |
| Y29<br>MreGalOx               | Mytilinidion<br>resinicola                                   | XP_03357056<br>5       | W | F | Q | F | R | Q | P | N | CBM32-<br>CBM32-CAT |
| Y3                            | Loramycetes<br>macrosporus                                   | jgi Lorma1 509<br>879  | Y | F | E | W | R | T | V | C | UNK-CAT             |
| Y35<br>CglAlcOx               | Colletotrichum<br>gloeosporioides                            | jgi Gloci1 190<br>1294 | F | W | L | F | M | T | L | C | CAT                 |
| Y36<br>PruAA5_2<br>(PruAlcOx) | Penicillium<br>rubens                                        | CAP96757               | W | Y | D | Y | R | E | P | S | CBM32-CAT           |
| Y4                            | Colletotrichum<br>incanum                                    | KZL84074               | W | F | R | F | A | D | Q | N | CAT                 |
| Y40<br>FoxAlcOx               | Fusarium<br>oxysporum f. sp.<br>conglutinans<br>race 2 54008 | FOPG_18201             | W | F | D | S | K | A | Q | C | CBM32-CAT           |
| Y41<br>FoxGalOxB              | Fusarium<br>oxysporum                                        | FOTG_04629             | W | M | Q | F | R | Q | P | C | UNK-CBM32-<br>CAT   |
| Y42<br>ExeGalOx               | Exophiala<br>xenobiotica                                     | KIW55415               | W | F | Q | F | R | Q | P | C | CBM32-<br>CBM32-CAT |
| Y5<br>PorAlcOx                | Magnaporthe<br>oryzae                                        | XP_00371936<br>9       | F | F | G | L | Y | T | L | C | WSC-CAT             |
| Y6                            | Colletotrichum<br>zoysiae                                    | jgi Colzo1 587<br>911  | Y | F | G | Y | - | T | V | C | UNK-CAT             |
| Y7                            | Amniculicola<br>lignicola                                    | KAF1999280             | W | Y | D | Y | R | Q | P | N | CBM32-<br>CBM32-CAT |
| Y8<br>AflAlcOx                | Aspergillus<br>flavus                                        | KAF7627372             | W | Y | L | Y | H | E | P | S | UNK-CBM32-<br>CAT   |
| Y9                            | Didymella<br>exigua                                          | XP_03344612<br>8       | W | F | Q | F | R | E | P | C | CBM32-<br>CBM32-CAT |
| Y10                           | Cladonia grayi                                               | jgi Clagr3 109<br>90   | W | F | E | Y | R | N | V | C | CBM32-CAT           |

|     |                                |                    |   |   |   |   |   |   |   |   |                 |
|-----|--------------------------------|--------------------|---|---|---|---|---|---|---|---|-----------------|
| Y26 | Bisporella sp.                 | jgi Bissp1 110239  | W | Y | Q | F | R | Q | P | N | UNK-CBM-CAT     |
| Y27 | Xanthoria parietina            | jgi Xanpa2 1578647 | W | F | R | Y | R | Q | P | N | CBM32-CAT       |
| Y28 | Pseudovirgaria hyperparasitica | XP_033597585       | W | F | G | V | R | E | P | N | CBM32-CBM32-CAT |
| Y30 | Ampelomyces quisqualis         | KAF1914598         | Y | F | E | W | R | T | V | C | UNK-CAT         |
| Y31 | Usnea florida                  | jgi Usnflo1 819633 | W | F | Q | Y | R | Q | P | C | CBM32-CAT       |
| Y32 | Nectria haematococca           | XP_003039318       | W | F | E | Y | R | R | P | C | CBM32-CAT       |
| Y33 | Penicillium rubens             | CAP97212           | W | F | - | L | R | D | P | Y | CBM32-CAT       |
| Y34 | Claviceps purpurea             | CCE30181           | W | F | Q | Y | R | Q | P | D | CBM32-CAT       |
| Y37 | Phialophora attae              | KPI34764           | W | Y | K | Y | R | D | I | C | UNK-CAT         |

**Table S2. Pairwise sequence ID/similarity matrix between characterized AA5\_2 enzymes.** Sequence similarity is highlighted in turquoise and sequence identity is highlighted in blue.

|                                                       | 1    | 2    | 3    | 4    | 5    | 6    | 7    | 8    | 9    | 10   | 11   | 12   | 13   | 14   | 15   | 16   | 17   | 18   | 19   |
|-------------------------------------------------------|------|------|------|------|------|------|------|------|------|------|------|------|------|------|------|------|------|------|------|
| 1. <i>FoxGalOx_2</i><br>(FOTG_04629)                  |      | 33.8 | 32.4 | 33.3 | 39.6 | 36.8 | 36.4 | 26.3 | 22.6 | 31.5 | 25.9 | 24.9 | 23.2 | 22.1 | 39.7 | 31.4 | 29.6 | 22.5 | 27.9 |
| 2. <i>AflAlcOx</i><br>(KAF7627372)                    | 46.1 |      | 48.2 | 50.9 | 43.8 | 38.9 | 49.4 | 36.2 | 32.3 | 45.2 | 35.2 | 36.2 | 33.7 | 31.8 | 51.6 | 42.9 | 28.2 | 31.7 | 35.5 |
| 3. <i>PruAA5_2A</i><br>( <i>PruAlcOx</i> ) (CAP96757) | 43.3 | 63.6 |      | 56.1 | 40   | 36.8 | 48.6 | 37.1 | 34.6 | 42.8 | 35.5 | 36.1 | 34.5 | 33.8 | 49   | 43.3 | 26   | 32.5 | 30.9 |
| 4. <i>PfeGalOx</i><br>( <i>jgiPenfe1</i>  382062)     | 44.8 | 65.9 | 72.1 |      | 40.6 | 36.6 | 49.6 | 36.4 | 33.7 | 43.1 | 36   | 36.3 | 35.6 | 32.6 | 47.5 | 45.3 | 26   | 32.1 | 35.2 |
| 5. <i>ExeGalOx</i><br>(KIW55415)                      | 51.2 | 58.2 | 52.8 | 55.3 |      | 52.7 | 43.7 | 35   | 32.7 | 37.9 | 33.8 | 33.9 | 32.4 | 29.8 | 46.5 | 39.1 | 32   | 31.3 | 35.9 |
| 6. <i>MreGalOx</i><br>(XP_033570565)                  | 48.7 | 53.4 | 50.2 | 49.8 | 66.7 |      | 42.3 | 35.1 | 31.3 | 35.3 | 34.7 | 34.4 | 32.3 | 29.6 | 40.8 | 36   | 32.7 | 30.5 | 32.2 |
| 7. <i>FoxAlcOx</i><br>(FOPG_18201)                    | 46.2 | 65.6 | 64.6 | 64.6 | 55.1 | 52.6 |      | 39.6 | 37.4 | 43.3 | 35.7 | 37.6 | 36.2 | 35   | 58.4 | 67.6 | 28.2 | 35.8 | 36   |
| 8. <i>PorAlcOx</i><br>(XP_003719369)                  | 36.9 | 52.6 | 54.2 | 53.6 | 46.2 | 47.6 | 52.2 |      | 57.3 | 37.7 | 37.7 | 38.3 | 38.4 | 38.5 | 37.9 | 40   | 26   | 55   | 33.9 |
| 9. <i>CglAlcOx</i><br>( <i>jgiGloci1</i>  1901294)    | 31.5 | 46.2 | 49.9 | 49.9 | 42.3 | 41.4 | 50.4 | 68.8 |      | 31.7 | 36.4 | 36.4 | 46.9 | 44.5 | 33.9 | 36.9 | 23.4 | 79.4 | 29.8 |
| 10. <i>AxyAlcOx</i><br>(XP_040706357)                 | 43   | 63.6 | 61.2 | 59.5 | 53.4 | 51   | 60   | 53.2 | 46.8 |      | 32.8 | 33.2 | 33.4 | 31.8 | 39.2 | 35.8 | 27.5 | 29.9 | 32.7 |
| 11. <i>UmaRafOx</i><br>(XP_011389156)                 | 35.7 | 51.6 | 52.6 | 53.9 | 47.6 | 48.2 | 51.6 | 54.6 | 52.7 | 51.1 |      | 80.5 | 43.2 | 39.9 | 36.2 | 35.1 | 43.2 | 33.4 | 35.5 |
| 12. <i>PhuRafOx</i><br>(XP_012186969)                 | 35.9 | 53.1 | 53.9 | 54.1 | 49.5 | 48.7 | 52.9 | 55.5 | 53   | 52   | 88.2 |      | 44.5 | 41   | 36   | 36.3 | 42.5 | 33.4 | 36.7 |
| 13. <i>StoAA5</i><br>(OAK97814)                       | 32   | 46.5 | 50.2 | 48.4 | 42.1 | 43.3 | 49.6 | 53.5 | 65.3 | 46.1 | 57.5 | 58.9 |      | 62.7 | 34.4 | 36.4 | 27.1 | 41.3 | 36.9 |
| 14. <i>CcaAA5</i><br>(PSN67470)                       | 30.3 | 44.4 | 47.7 | 45.9 | 39.5 | 39.2 | 46.8 | 52.7 | 63.2 | 45.3 | 54.3 | 55.4 | 75.6 |      | 32.7 | 35.1 | 24.1 | 40.1 | 34   |
| 15. <i>FgrGalOx</i><br>(AAO95371)                     | 48.5 | 67.6 | 66.4 | 65.2 | 58   | 51.9 | 71.9 | 53.8 | 48.5 | 57.9 | 54.8 | 55.6 | 50.5 | 47.6 |      | 58   | 30   | 37.6 | 38.8 |
| 16. <i>FgrAAO</i><br>(XP_011322138)                   | 40.7 | 57.3 | 60.4 | 60.9 | 49.6 | 46.6 | 74.6 | 56.3 | 54.5 | 52.3 | 53.2 | 53.9 | 53.3 | 50.9 | 72.1 |      | 27.6 | 42.2 | 35.9 |
| 17. <i>CgrRafOx</i><br>(EFQ36699.1)                   | 44.3 | 42.1 | 39.8 | 41.1 | 48.6 | 48   | 40.9 | 39.4 | 34.6 | 41.4 | 52.2 | 52   | 36   | 34.4 | 40.9 | 37.8 |      | 25.2 | 32.8 |
| 18. <i>CgrAlcOx</i><br>(EFQ30446)                     | 31.6 | 46.2 | 46.9 | 48.1 | 41.5 | 40.3 | 48.5 | 67.5 | 88.4 | 45.3 | 50.2 | 49.8 | 60.8 | 59.1 | 52.1 | 57.2 | 34.7 |      | 33.4 |
| 19. <i>CgrAAO</i><br>(EFQ27661.1)                     | 40.7 | 54.6 | 51.3 | 54.7 | 51.1 | 49.2 | 52.2 | 50.4 | 44.6 | 50.5 | 53.3 | 54.9 | 48.7 | 47.4 | 54.4 | 51.1 | 47.3 | 47.3 |      |

**Table S3. Purification yields of expressed AA5\_2 proteins from 400 mL of BMMY culture after three days of methanol feeding.**

| Enzyme           | Purification Yield |                    |
|------------------|--------------------|--------------------|
|                  | mg                 | mg.L <sup>-1</sup> |
| <i>UmaRafOx</i>  | 16                 | 40                 |
| <i>PorAlcOx</i>  | 0.9                | 2.2                |
| <i>AflAlcOx</i>  | 17                 | 43                 |
| <i>PfeGalOx</i>  | 8.4                | 21                 |
| <i>PhuRafOx</i>  | 2.4                | 6.0                |
| <i>StoAA5</i>    | 2.2                | 5.5                |
| <i>AsyAlcOx</i>  | 26                 | 65                 |
| <i>CcaAA5</i>    | 3.9                | 9.8                |
| <i>MreGalOx</i>  | 2.0                | 5.0                |
| <i>CglAlcOx</i>  | 21                 | 53                 |
| <i>PruAlcOx</i>  | 14                 | 35                 |
| <i>FoxAlcOx</i>  | 2.8                | 7.0                |
| <i>FoxGalOxB</i> | 3.0                | 7.5                |
| <i>ExeGalOx</i>  | 3.1                | 7.8                |

**Table S4. Initial activity screens\* of produced AA5\_2 on galactose, raffinose and benzyl alcohol**

| Enzyme           | Specific Activity ( $\mu\text{mol}\cdot\text{min}^{-1}\cdot\text{mg}^{-1}$ ) |                    |                        |
|------------------|------------------------------------------------------------------------------|--------------------|------------------------|
|                  | Galactose (300 mM)                                                           | Raffinose (300 mM) | Benzyl Alcohol (30 mM) |
| <i>UmaRafOx</i>  | 0.19±0.01                                                                    | 2.78±0.27          | 1.11±0.07              |
| <i>PorAlcOx</i>  | 0.44±0.02                                                                    | 0.97±0.45          | 4.44±0.09              |
| <i>AflAlcOx</i>  | 15.1±4.26                                                                    | n.m.§              | 48.8±1.21              |
| <i>PfeGalOx</i>  | 41.4±4.66                                                                    | 27.8±0.93          | 11.4±2.33              |
| <i>PhuRafOx</i>  | 0.04±0.02                                                                    | 1.89±0.45          | 1.00±0.09              |
| <i>AsyAlcOx</i>  | 0.30±0.02                                                                    | 0.06±0.01          | 3.71±0.08              |
| <i>MreGalOx</i>  | 4.08±0.48                                                                    | 4.53±0.14          | 0.38±0.01              |
| <i>CglAlcOx</i>  | 2.27±0.12                                                                    | 26.9±0.93          | 524 ±28.0              |
| <i>PruAlcOx</i>  | 50.1±0.63                                                                    | 20.2±0.89          | 35.5±2.72              |
| <i>FoxAlcOx</i>  | 0.79±0.03                                                                    | 0.15±0.03          | 2.02±0.19              |
| <i>FoxGalOxB</i> | 68.0±0.96                                                                    | 50.3±4.26          | 6.50±0.22              |
| <i>ExeGalOx</i>  | 13.8±1.04                                                                    | 6.52±0.15          | 3.45±0.27              |

\*Measurements were performed in triplicates at 30 °C in 100 mM sodium-phosphate buffer at pH 8.0 using the HRP/ABTS assay. Activities were monitored using concentrations indicated within parentheses for each substrate.

§No activity detected with a specific activity limit of detection of  $9 \times 10^{-4} \mu\text{mol}\cdot\text{min}^{-1}\cdot\text{mg}^{-1}$  using 0.39 nmole of purified enzyme.

**Table S5. Initial activity screens\* of *ExeGalOx* and *MreGalOx***

|                         | Substrate                       | Specific Activity ( $\mu\text{mol}\cdot\text{min}^{-1}\cdot\text{mg}^{-1}$ ) |                 |
|-------------------------|---------------------------------|------------------------------------------------------------------------------|-----------------|
|                         |                                 | <i>ExeGalOx</i>                                                              | <i>MreGalOx</i> |
| <b>Carbohydrates</b>    | D-Galactose (300mM)             | 20.7 $\pm$ 0.42                                                              | 5.73 $\pm$ 1.72 |
|                         | D-Lactose (300mM)               | 6.27 $\pm$ 0.45                                                              | 1.93 $\pm$ 0.20 |
|                         | Raffinose (300mM)               | 9.06 $\pm$ 1.45                                                              | 4.28 $\pm$ 1.06 |
|                         | D-Mannose (300mM)               | 0.01 $\pm$ 0.00                                                              | 0.01 $\pm$ 0.00 |
|                         | Melibiose (300mM)               | 9.00 $\pm$ 0.80                                                              | 4.67 $\pm$ 0.50 |
|                         | D-Fructose (300mM)              | 0.08 $\pm$ 0.00                                                              | n.m.§           |
|                         | D-Xylose (300mM)                | 0.12 $\pm$ 0.01                                                              | 0.01 $\pm$ 0.00 |
|                         | D-Glucose (300mM)               | 0.01 $\pm$ 0.00                                                              | 0.01 $\pm$ 0.00 |
|                         | Sucrose (300mM)                 | n.m.§                                                                        | 0.02 $\pm$ 0.02 |
|                         | D-Ribose (300mM)                | n.m.§                                                                        | 0.01 $\pm$ 0.00 |
|                         | L-Arabinose (300mM)             | 0.68 $\pm$ 0.09                                                              | 0.08 $\pm$ 0.02 |
| <b>Polyols</b>          | Glycerol (300mM)                | 1.42 $\pm$ 0.01                                                              | 0.09 $\pm$ 0.02 |
|                         | Sorbitol (300mM)                | 0.37 $\pm$ 0.00                                                              | 0.01 $\pm$ 0.00 |
|                         | Galactitol (300mM)              | 0.16 $\pm$ 0.00                                                              | 0.01 $\pm$ 0.00 |
|                         | Mannitol (300mM)                | NA                                                                           | 0.01 $\pm$ 0.00 |
| <b>Diols</b>            | 1,2-Propanediol (300mM)         | 0.23 $\pm$ 0.03                                                              | n.m.§           |
|                         | 1,3-Propanediol (300mM)         | 0.68 $\pm$ 0.03                                                              | 0.01 $\pm$ 0.00 |
|                         | 1,4-Butanediol (300mM)          | 0.66 $\pm$ 0.01                                                              | 0.01 $\pm$ 0.00 |
|                         | 1,5-Pentanediol (300mM)         | NA                                                                           | n.m.§           |
|                         | 1,6-Hexanediol (300mM)          | NA                                                                           | n.m.§           |
| <b>Aldehyde</b>         | Methyl Glyoxal (5mM)            | n.m.§                                                                        | n.m.§           |
|                         | Glycolaldehyde Dimer (5mM)      | NA                                                                           | NA              |
| <b>Primary alcohols</b> | Ethanol (300mM)                 | 0.30 $\pm$ 0.01                                                              | n.m.§           |
|                         | Methanol (300mM)                | 0.12 $\pm$ 0.01                                                              | n.m.§           |
|                         | 1-Butanol (300mM)               | 0.39 $\pm$ 0.02                                                              | n.m.§           |
|                         | Hexanol (2.5mM)                 | 0.38 $\pm$ 0.04                                                              | 0.01 $\pm$ 0.00 |
|                         | Octanol (2.5mM)                 | n.m.§                                                                        | n.m.§           |
| <b>Aryl alcohols</b>    | Benzyl alcohol (30mM)           | 0.72 $\pm$ 0.02                                                              | 0.02 $\pm$ 0.01 |
|                         | Cinnamyl alcohol (2.5mM)        | 0.40 $\pm$ 0.00                                                              | n.m.§           |
|                         | 4-methoxybenzyl alcohol (2.5mM) | 0.40 $\pm$ 0.01                                                              | 0.02 $\pm$ 0.02 |
|                         | 3-methoxybenzyl alcohol (2.5mM) | 0.81 $\pm$ 0.02                                                              | 0.04 $\pm$ 0.01 |
|                         | Coniferyl alcohol (5mM)         | n.m.§                                                                        | n.m.§           |
|                         | Veratryl alcohol (2.5mM)        | 1.19 $\pm$ 0.02                                                              | 0.05 $\pm$ 0.01 |
|                         | 4-hydroxybenzyl alcohol (2.5mM) | 0.06 $\pm$ 0.01                                                              | n.m.§           |
|                         | Vanillyl alcohol (2.5mM)        | 0.01 $\pm$ 0.00                                                              | 0.02 $\pm$ 0.02 |
| <b>Furans</b>           | HMF (2.5mM)                     | 0.26 $\pm$ 0.05                                                              | n.m.§           |
|                         | HMFCa (2.5mM)                   | 0.31 $\pm$ 0.04                                                              | n.m.§           |
|                         | DFF (2.5mM)                     | n.m.§                                                                        | n.m.§           |
|                         | FFCA (2.5mM)                    | 0.02 $\pm$ 0.01                                                              | n.m.§           |
|                         | Furfural (2.5mM)                | NA                                                                           | n.m.§           |

\*Measurements were performed in triplicate at RT in 100 mM buffer in different buffers at different pH using the HRP/ABTS plate assay. Activities were monitored using concentrations indicated within parentheses for each substrate.

§No activity detected with a specific activity limit of detection of  $9 \times 10^{-4} \mu\text{mol}\cdot\text{min}^{-1}\cdot\text{mg}^{-1}$  using 0.17 nmole of purified *ExeGalOx* enzyme and of purified *MreGalOx* enzyme.



**Table S6. Initial activity screens\* of *PfeGalOx* and *FoxGalOxB***

|                         | Substrate                       | Specific Activity ( $\mu\text{mol}\cdot\text{min}^{-1}\cdot\text{mg}^{-1}$ ) |                  |
|-------------------------|---------------------------------|------------------------------------------------------------------------------|------------------|
|                         |                                 | <i>PreGalOx</i>                                                              | <i>FoxGalOxB</i> |
| <b>Carbohydrates</b>    | D-Galactose (300mM)             | 182 $\pm$ 11.6                                                               | 60.7 $\pm$ 5.77  |
|                         | D-Lactose (300mM)               | 69.7 $\pm$ 11.2                                                              | 16.2 $\pm$ 1.16  |
|                         | Raffinose (300mM)               | 93.0 $\pm$ 0.75                                                              | 25.9 $\pm$ 1.34  |
|                         | D-Mannose (300mM)               | 15.4 $\pm$ 1.27                                                              | 0.37 $\pm$ 0.09  |
|                         | Melibiose (300mM)               | 26.7 $\pm$ 11.5                                                              | 59.7 $\pm$ 3.46  |
|                         | D-Fructose (300mM)              | 23.0 $\pm$ 4.04                                                              | 0.35 $\pm$ 0.02  |
|                         | D-Xylose (300mM)                | 114 $\pm$ 22.0                                                               | 0.61 $\pm$ 0.06  |
|                         | D-Glucose (300mM)               | 4.55 $\pm$ 0.46                                                              | 0.03 $\pm$ 0.02  |
|                         | Sucrose (300mM)                 | 0.44 $\pm$ 0.08                                                              | 0.01 $\pm$ 0.00  |
|                         | D-Ribose (300mM)                | 45.8 $\pm$ 2.40                                                              | 0.85 $\pm$ 0.09  |
|                         | L-Arabinose (300mM)             | 9.02 $\pm$ 0.49                                                              | 2.13 $\pm$ 0.07  |
| <b>Polyols</b>          | Glycerol (300mM)                | 193 $\pm$ 44.9                                                               | 5.07 $\pm$ 0.22  |
|                         | Sorbitol (300mM)                | 28.0 $\pm$ 2.36                                                              | 2.63 $\pm$ 0.07  |
|                         | Galactitol (300mM)              | 5.29 $\pm$ 0.30                                                              | 1.04 $\pm$ 0.06  |
|                         | Mannitol (300mM)                | 19.6 $\pm$ 1.91                                                              | NA               |
| <b>Diols</b>            | 1,2-Propanediol (300mM)         | 11.4 $\pm$ 1.29                                                              | 2.44 $\pm$ 0.22  |
|                         | 1,3-Propanediol (300mM)         | 6.21 $\pm$ 1.76                                                              | 4.88 $\pm$ 0.42  |
|                         | 1,4-Butanediol (300mM)          | 1.33 $\pm$ 0.18                                                              | 5.57 $\pm$ 0.37  |
|                         | 1,5-Pentanediol (300mM)         | 0.66 $\pm$ 0.03                                                              | 4.83 $\pm$ 0.15  |
|                         | 1,6-Hexanediol (300mM)          | 4.28 $\pm$ 0.44                                                              | 3.68 $\pm$ 0.23  |
| <b>Aldehyde</b>         | Methyl Glyoxal (5mM)            | 0.43 $\pm$ 0.14                                                              | 0.61 $\pm$ 0.02  |
| <b>Primary alcohols</b> | Ethanol (300mM)                 | 0.43 $\pm$ 0.14                                                              | 3.76 $\pm$ 0.57  |
|                         | Methanol (300mM)                | 1.25 $\pm$ 0.02                                                              | 0.89 $\pm$ 0.05  |
|                         | 1-Butanol (300mM)               | 0.91 $\pm$ 0.07                                                              | 3.80 $\pm$ 0.10  |
|                         | Hexanol (2.5mM)                 | 0.24 $\pm$ 0.07                                                              | 2.24 $\pm$ 0.31  |
|                         | Octanol (2.5mM)                 | 0.44 $\pm$ 0.17                                                              | 2.00 $\pm$ 0.11  |
| <b>Aryl alcohols</b>    | Benzyl alcohol (30mM)           | 20.3 $\pm$ 1.59                                                              | 5.84 $\pm$ 0.20  |
|                         | Cinnamyl alcohol (2.5mM)        | 6.76 $\pm$ 1.02                                                              | 3.60 $\pm$ 0.43  |
|                         | 4-methoxybenzyl alcohol (2.5mM) | 2.39 $\pm$ 0.21                                                              | 1.78 $\pm$ 0.71  |
|                         | 3-methoxybenzyl alcohol (2.5mM) | 3.76 $\pm$ 0.15                                                              | 6.66 $\pm$ 0.30  |
|                         | Coniferyl alcohol (5mM)         | 0.15 $\pm$ 0.08                                                              | n.m.§            |
|                         | Veratryl alcohol (2.5mM)        | 2.34 $\pm$ 0.21                                                              | 10.2 $\pm$ 0.21  |
|                         | 4-hydroxybenzyl alcohol (2.5mM) | 0.05 $\pm$ 0.01                                                              | 0.10 $\pm$ 0.12  |
|                         | Vanillyl alcohol (2.5mM)        | 0.01 $\pm$ 0.00                                                              | n.m.§            |
| <b>Furans</b>           | HMF (2.5mM)                     | 1.51 $\pm$ 0.12                                                              | 3.34 $\pm$ 0.20  |
|                         | HMFCFA (2.5mM)                  | 1.31 $\pm$ 0.19                                                              | 3.31 $\pm$ 0.32  |
|                         | DFF (2.5mM)                     | 0.43 $\pm$ 0.18                                                              | 0.52 $\pm$ 0.03  |
|                         | FFCA (2.5mM)                    | 0.30 $\pm$ 0.11                                                              | 0.02 $\pm$ 0.00  |
|                         | Furfural (2.5mM)                | 0.17 $\pm$ 0.03                                                              | n.m.§            |

\*Measurements were performed in triplicate at RT in 100 mM buffer in different buffers at different pH using the HRP/ABTS plate assay. Activities were monitored using concentrations indicated within parentheses for each substrate.

§No activity detected with a specific activity limit of detection of  $9 \times 10^{-4} \mu\text{mol}\cdot\text{min}^{-1}\cdot\text{mg}^{-1}$  using 0.2 nmole of purified *PfeGalOx* enzyme and 0.13 nmole of purified *FoxGalOxB* enzyme.

**Table S7. Initial activity screens\* of *UmaRafOx* and *PhuRafOx***

|                         | Substrate                       | Specific Activity ( $\mu\text{mol}\cdot\text{min}^{-1}\cdot\text{mg}^{-1}$ ) |                 |
|-------------------------|---------------------------------|------------------------------------------------------------------------------|-----------------|
|                         |                                 | <i>UmaRafOx</i>                                                              | <i>PhuRafOx</i> |
| <b>Carbohydrates</b>    | D-Galactose (300mM)             | 0.17 $\pm$ 0.01                                                              | 0.24 $\pm$ 0.02 |
|                         | D-Lactose (300mM)               | 0.04 $\pm$ 0.01                                                              | 0.08 $\pm$ 0.02 |
|                         | Raffinose (300mM)               | 1.77 $\pm$ 0.56                                                              | 2.21 $\pm$ 0.13 |
|                         | D-Mannose (300mM)               | 0.01 $\pm$ 0.00                                                              | n.m.§           |
|                         | Melibiose (300mM)               | 0.67 $\pm$ 0.06                                                              | 0.41 $\pm$ 0.03 |
|                         | D-Fructose (300mM)              | 0.04 $\pm$ 0.01                                                              | 0.05 $\pm$ 0.01 |
|                         | D-Xylose (300mM)                | 0.01 $\pm$ 0.00                                                              | n.m.§           |
|                         | D-Glucose (300mM)               | n.m.§                                                                        | n.m.§           |
|                         | Sucrose (300mM)                 | n.m.§                                                                        | n.m.§           |
|                         | D-Ribose (300mM)                | 0.02 $\pm$ 0.00                                                              | n.m.§           |
|                         | L-Arabinose (300mM)             | 0.08 $\pm$ 0.01                                                              | 0.12 $\pm$ 0.02 |
| <b>Polyols</b>          | Glycerol (300mM)                | 3.22 $\pm$ 0.15                                                              | 5.41 $\pm$ 0.58 |
|                         | Sorbitol (300mM)                | 0.23 $\pm$ 0.02                                                              | 0.42 $\pm$ 0.05 |
|                         | Galactitol (300mM)              | 0.01 $\pm$ 0.00                                                              | n.m.§           |
|                         | Mannitol (300mM)                | 0.07 $\pm$ 0.01                                                              | 0.11 $\pm$ 0.01 |
| <b>Diols</b>            | 1,2-Propanediol (300mM)         | 0.28 $\pm$ 0.05                                                              | 0.37 $\pm$ 0.06 |
|                         | 1,3-Propanediol (300mM)         | 0.47 $\pm$ 0.17                                                              | 1.23 $\pm$ 0.08 |
|                         | 1,4-Butanediol (300mM)          | 0.32 $\pm$ 0.11                                                              | 0.23 $\pm$ 0.09 |
|                         | 1,5-Pentanediol (300mM)         | 0.02 $\pm$ 0.00                                                              | 0.01 $\pm$ 0.00 |
|                         | 1,6-Hexanediol (300mM)          | 0.02 $\pm$ 0.00                                                              | 0.01 $\pm$ 0.00 |
| <b>Aldehyde</b>         | Methyl Glyoxal (5mM)            | 0.03 $\pm$ 0.05                                                              | 0.01 $\pm$ 0.00 |
|                         | Glycolaldehyde (5mM)            | 1.40 $\pm$ 0.26                                                              | 1.03 $\pm$ 0.30 |
| <b>Primary alcohols</b> | Ethanol (300mM)                 | 0.01 $\pm$ 0.00                                                              | 0.02 $\pm$ 0.01 |
|                         | Methanol (300mM)                | 0.02 $\pm$ 0.00                                                              | 0.03 $\pm$ 0.00 |
|                         | 1-Butanol (300mM)               | 0.01 $\pm$ 0.00                                                              | 0.01 $\pm$ 0.00 |
|                         | Hexanol (2.5mM)                 | 0.01 $\pm$ 0.00                                                              | n.m.§           |
|                         | Octanol (2.5mM)                 | n.m.§                                                                        | 0.02 $\pm$ 0.01 |
| <b>Aryl alcohols</b>    | Benzyl alcohol (30mM)           | 0.46 $\pm$ 0.16                                                              | 0.40 $\pm$ 0.04 |
|                         | Cinnamyl alcohol (2.5mM)        | 0.23 $\pm$ 0.05                                                              | 0.39 $\pm$ 0.04 |
|                         | 4-methoxybenzyl alcohol (2.5mM) | 0.04 $\pm$ 0.01                                                              | 0.06 $\pm$ 0.04 |
|                         | 3-methoxybenzyl alcohol (2.5mM) | 0.15 $\pm$ 0.06                                                              | 0.23 $\pm$ 0.02 |
|                         | Coniferyl alcohol (5mM)         | 0.01 $\pm$ 0.00                                                              | 0.01 $\pm$ 0.01 |
|                         | Veratryl alcohol (2.5mM)        | 0.13 $\pm$ 0.00                                                              | 0.14 $\pm$ 0.03 |
|                         | 4-hydroxybenzyl alcohol (2.5mM) | 0.02 $\pm$ 0.01                                                              | 0.02 $\pm$ 0.02 |
|                         | Vanillyl alcohol (2.5mM)        | n.m.§                                                                        | 0.03 $\pm$ 0.01 |
| <b>Furans</b>           | HMF (2.5mM)                     | 0.12 $\pm$ 0.02                                                              | 0.03 $\pm$ 0.01 |
|                         | HMFCFA (2.5mM)                  | 0.07 $\pm$ 0.01                                                              | 0.01 $\pm$ 0.01 |
|                         | DFE (2.5mM)                     | 0.01 $\pm$ 0.01                                                              | 0.04 $\pm$ 0.00 |
|                         | FFCA (2.5mM)                    | n.m.§                                                                        | n.m.§           |
|                         | Furfural (2.5mM)                | n.m.§                                                                        | 0.05 $\pm$ 0.03 |

\*Measurements were performed in triplicate at RT in 100 mM buffer in different buffers at different pH using the HRP/ABTS plate assay. Activities were monitored using concentrations indicated within parentheses for each substrate.

§No activity detected with a specific activity limit of detection of  $9 \times 10^{-4} \mu\text{mol}\cdot\text{min}^{-1}\cdot\text{mg}^{-1}$  using 1.12 nmole of purified *UmaRafOx* enzyme and 0.23 nmole of purified *PhuRafOx* enzyme.

**Table S8. Initial activity screens\* of *AflAlcOx* and *PruAlcOx***

|                         | Substrate                       | Specific Activity ( $\mu\text{mol}\cdot\text{min}^{-1}\cdot\text{mg}^{-1}$ ) |                 |
|-------------------------|---------------------------------|------------------------------------------------------------------------------|-----------------|
|                         |                                 | <i>AflAlcOx</i>                                                              | <i>PruAlcOx</i> |
| <b>Carbohydrates</b>    | D-Galactose (300mM)             | 65.0 $\pm$ 1.41                                                              | 79.9 $\pm$ 29.4 |
|                         | D-Lactose (300mM)               | 7.07 $\pm$ 0.37                                                              | 12.2 $\pm$ 2.12 |
|                         | Raffinose (300mM)               | 12.0 $\pm$ 1.36                                                              | 13.5 $\pm$ 3.73 |
|                         | D-Mannose (300mM)               | 0.14 $\pm$ 0.09                                                              | 2.87 $\pm$ 0.76 |
|                         | Melibiose (300mM)               | 17.4 $\pm$ 1.39                                                              | 8.41 $\pm$ 2.32 |
|                         | D-Fructose (300mM)              | 2.64 $\pm$ 0.01                                                              | 9.10 $\pm$ 3.36 |
|                         | D-Xylose (300mM)                | 3.34 $\pm$ 1.63                                                              | 3.70 $\pm$ 1.05 |
|                         | D-Glucose (300mM)               | 0.07 $\pm$ 0.01                                                              | 0.29 $\pm$ 0.04 |
|                         | Sucrose (300mM)                 | 0.28 $\pm$ 0.02                                                              | n.m.§           |
|                         | D-Ribose (300mM)                | 0.45 $\pm$ 0.12                                                              | 4.67 $\pm$ 1.78 |
|                         | L-Arabinose (300mM)             | 1.95 $\pm$ 0.55                                                              | 3.20 $\pm$ 0.13 |
| <b>Polyols</b>          | Glycerol (300mM)                | 35.7 $\pm$ 1.50                                                              | 119 $\pm$ 12.7  |
|                         | Sorbitol (300mM)                | 1.46 $\pm$ 0.09                                                              | 9.50 $\pm$ 2.18 |
|                         | Galactitol (300mM)              | 3.10 $\pm$ 0.04                                                              | 3.44 $\pm$ 0.36 |
| <b>Diols</b>            | 1,2-Propanediol (300mM)         | 14.5 $\pm$ 0.21                                                              | 38.3 $\pm$ 2.38 |
|                         | 1,3-Propanediol (300mM)         | 9.51 $\pm$ 0.24                                                              | 34.8 $\pm$ 2.71 |
|                         | 1,4-Butanediol (300mM)          | 30.9 $\pm$ 6.72                                                              | 18.8 $\pm$ 2.43 |
|                         | 1,5-Pentanediol (300mM)         | 25.0 $\pm$ 0.67                                                              | 17.8 $\pm$ 1.04 |
|                         | 1,6-Hexanediol (300mM)          | 25.0 $\pm$ 0.25                                                              | 14.0 $\pm$ 3.01 |
| <b>Aldehyde</b>         | Methyl Glyoxal (5mM)            | 2.47 $\pm$ 0.26                                                              | 4.57 $\pm$ 1.92 |
| <b>Primary alcohols</b> | Ethanol (300mM)                 | 1.51 $\pm$ 0.09                                                              | 3.50 $\pm$ 0.21 |
|                         | Methanol (300mM)                | 1.22 $\pm$ 0.04                                                              | 2.54 $\pm$ 0.46 |
|                         | 1-Butanol (300mM)               | 25.0 $\pm$ 2.27                                                              | 12.9 $\pm$ 2.08 |
|                         | Hexanol (2.5mM)                 | 0.46 $\pm$ 0.11                                                              | 0.95 $\pm$ 0.22 |
|                         | Octanol (2.5mM)                 | n.m.§                                                                        | 0.07 $\pm$ 0.02 |
| <b>Aryl alcohols</b>    | Benzyl alcohol (30mM)           | 248 $\pm$ 16.6                                                               | 61.5 $\pm$ 5.43 |
|                         | Cinnamyl alcohol (2.5mM)        | 22.4 $\pm$ 1.02                                                              | 26.2 $\pm$ 2.57 |
|                         | 4-methoxybenzyl alcohol (2.5mM) | 12.1 $\pm$ 0.53                                                              | 8.56 $\pm$ 1.30 |
|                         | 3-methoxybenzyl alcohol (2.5mM) | 45.5 $\pm$ 2.82                                                              | 23.9 $\pm$ 2.85 |
|                         | Coniferyl alcohol (5mM)         | n.m.§                                                                        | 4.57 $\pm$ 1.92 |
|                         | Veratryl alcohol (2.5mM)        | 9.80 $\pm$ 0.32                                                              | 2.61 $\pm$ 0.38 |
|                         | 4-hydroxybenzyl alcohol (2.5mM) | 2.48 $\pm$ 1.16                                                              | 2.51 $\pm$ 3.70 |
|                         | Vanillyl alcohol (2.5mM)        | n.m.§                                                                        | n.m.§           |
| <b>Furans</b>           | HMF (2.5mM)                     | 52.8 $\pm$ 3.92                                                              | 28.7 $\pm$ 11.2 |
|                         | HMFCa (2.5mM)                   | 8.58 $\pm$ 0.89                                                              | 21.7 $\pm$ 2.17 |
|                         | DFF (2.5mM)                     | 0.16 $\pm$ 0.01                                                              | 0.46 $\pm$ 0.03 |
|                         | FFCA (2.5mM)                    | n.m.§                                                                        | 0.03 $\pm$ 0.02 |
|                         | Furfural (2.5mM)                | NA                                                                           | NA              |

\*Measurements were performed in triplicate at RT in 100 mM buffer in different buffers at different pH using the HRP/ABTS plate assay. Activities were monitored using concentrations indicated within parentheses for each substrate.

§No activity detected with a specific activity limit of detection of  $9 \times 10^{-4} \mu\text{mol}\cdot\text{min}^{-1}\cdot\text{mg}^{-1}$  using 0.2 nmole of purified *AflAlcOx* enzyme and 1.0 nmole of purified *PruAlcOx* enzyme.

**Table S9. Initial activity screens\* of *FoxAlcOx* and *AsyAlcOx***

|                         | Substrate                       | Specific Activity ( $\mu\text{mol}\cdot\text{min}^{-1}\cdot\text{mg}^{-1}$ ) |                 |
|-------------------------|---------------------------------|------------------------------------------------------------------------------|-----------------|
|                         |                                 | <i>FoxAlcOx</i>                                                              | <i>AsyAlcOx</i> |
| <b>Carbohydrates</b>    | D-Galactose (300mM)             | 0.83 $\pm$ 0.22                                                              | 0.33 $\pm$ 0.11 |
|                         | D-Lactose (300mM)               | 0.11 $\pm$ 0.01                                                              | 0.25 $\pm$ 0.12 |
|                         | Raffinose (300mM)               | 0.08 $\pm$ 0.02                                                              | 0.02 $\pm$ 0.03 |
|                         | D-Mannose (300mM)               | 0.26 $\pm$ 0.03                                                              | 0.01 $\pm$ 0.01 |
|                         | Melibiose (300mM)               | 0.03 $\pm$ 0.01                                                              | n.m.§           |
|                         | D-Fructose (300mM)              | 0.35 $\pm$ 0.07                                                              | 0.76 $\pm$ 0.29 |
|                         | D-Xylose (300mM)                | n.m.§                                                                        | n.m.§           |
|                         | D-Glucose (300mM)               | 0.05 $\pm$ 0.01                                                              | 0.01 $\pm$ 0.01 |
|                         | Sucrose (300mM)                 | 0.02 $\pm$ 0.00                                                              | n.m.§           |
|                         | D-Ribose (300mM)                | n.m.§                                                                        | n.m.§           |
| L-Arabinose (300mM)     | 0.01 $\pm$ 0.00                 | n.m.§                                                                        |                 |
| <b>Polyols</b>          | Glycerol (300mM)                | 0.15 $\pm$ 0.03                                                              | 5.47 $\pm$ 2.24 |
|                         | Sorbitol (300mM)                | 0.01 $\pm$ 0.00                                                              | 4.56 $\pm$ 0.29 |
|                         | Galactitol (300mM)              | 0.01 $\pm$ 0.00                                                              | 0.76 $\pm$ 0.02 |
|                         | Mannitol (300mM)                | 0.01 $\pm$ 0.00                                                              | 3.66 $\pm$ 0.56 |
| <b>Diols</b>            | 1,2-Propanediol (300mM)         | 0.05 $\pm$ 0.00                                                              | 1.04 $\pm$ 0.16 |
|                         | 1,3-Propanediol (300mM)         | 0.06 $\pm$ 0.01                                                              | 1.83 $\pm$ 0.42 |
|                         | 1,4-Butanediol (300mM)          | 0.16 $\pm$ 0.08                                                              | 1.60 $\pm$ 0.44 |
|                         | 1,5-Pentanediol (300mM)         | 0.06 $\pm$ 0.00                                                              | 3.98 $\pm$ 1.22 |
|                         | 1,6-Hexanediol (300mM)          | 0.03 $\pm$ 0.00                                                              | 7.41 $\pm$ 1.15 |
| <b>Aldehyde</b>         | Methyl Glyoxal (5mM)            | 0.81 $\pm$ 0.04                                                              | 0.09 $\pm$ 0.16 |
|                         | Glycolaldehyde Dimer (5mM)      | 0.69 $\pm$ 0.27                                                              | NA              |
| <b>Primary alcohols</b> | Ethanol (300mM)                 | 0.02 $\pm$ 0.00                                                              | 0.44 $\pm$ 0.10 |
|                         | Methanol (300mM)                | 0.01 $\pm$ 0.00                                                              | 0.01 $\pm$ 0.01 |
|                         | 1-Butanol (300mM)               | 0.02 $\pm$ 0.00                                                              | 1.76 $\pm$ 0.32 |
|                         | Hexanol (2.5mM)                 | 0.01 $\pm$ 0.00                                                              | 0.12 $\pm$ 0.11 |
|                         | Octanol (2.5mM)                 | n.m.§                                                                        | n.m.§           |
| <b>Aryl alcohols</b>    | Benzyl alcohol (30mM)           | 1.85 $\pm$ 0.37                                                              | 11.6 $\pm$ 5.83 |
|                         | Cinnamyl alcohol (2.5mM)        | 0.10 $\pm$ 0.06                                                              | 3.24 $\pm$ 0.73 |
|                         | 4-methoxybenzyl alcohol (2.5mM) | 0.25 $\pm$ 0.03                                                              | 3.13 $\pm$ 1.18 |
|                         | 3-methoxybenzyl alcohol (2.5mM) | 0.10 $\pm$ 0.02                                                              | 4.20 $\pm$ 0.37 |
|                         | Coniferyl alcohol (5mM)         | n.m.§                                                                        | n.m.§           |
|                         | Veratryl alcohol (2.5mM)        | 0.21 $\pm$ 0.01                                                              | 1.22 $\pm$ 0.19 |
|                         | 4-hydroxybenzyl alcohol (2.5mM) | 0.02 $\pm$ 0.00                                                              | n.m.§           |
|                         | Vanillyl alcohol (2.5mM)        | n.m.§                                                                        | n.m.§           |
| <b>Furans</b>           | HMF (2.5mM)                     | 0.09 $\pm$ 0.00                                                              | 0.45 $\pm$ 0.04 |
|                         | HMFCa (2.5mM)                   | 0.09 $\pm$ 0.01                                                              | 0.27 $\pm$ 0.03 |
|                         | DFF (2.5mM)                     | 0.05 $\pm$ 0.01                                                              | n.m.§           |
|                         | FFCA (2.5mM)                    | 0.01 $\pm$ 0.00                                                              | n.m.§           |
|                         | Furfural (2.5mM)                | n.m.§                                                                        | n.m.§           |

\*Measurements were performed in triplicate at RT in 100 mM buffer in different buffers at different pH using the HRP/ABTS plate assay. Activities were monitored using concentrations indicated within parentheses for each substrate.

§No activity detected with a specific activity limit of detection of  $9 \times 10^{-4} \mu\text{mol}\cdot\text{min}^{-1}\cdot\text{mg}^{-1}$  using 0.20 nmole of purified *FoxAlcOx* enzyme and 0.20 nmole of purified *AsyAlcOx* enzyme.



**Table S10. Initial activity screens\* of *PorAlcOx* and *CglAlcOx***

|                         | Substrate                       | Specific Activity ( $\mu\text{mol}\cdot\text{min}^{-1}\cdot\text{mg}^{-1}$ ) |                  |
|-------------------------|---------------------------------|------------------------------------------------------------------------------|------------------|
|                         |                                 | <i>PorAlcOx</i>                                                              | <i>CglAlcOx</i>  |
| <b>Carbohydrates</b>    | D-Galactose (300mM)             | 1.71 $\pm$ 0.89                                                              | 0.82 $\pm$ 0.04  |
|                         | D-Lactose (300mM)               | 1.16 $\pm$ 0.90                                                              | 0.40 $\pm$ 0.02  |
|                         | Raffinose (300mM)               | 3.00 $\pm$ 0.65                                                              | 61.21 $\pm$ 7.27 |
|                         | D-Mannose (300mM)               | 2.95 $\pm$ 0.99                                                              | n.m.§            |
|                         | Melibiose (300mM)               | 0.25 $\pm$ 0.18                                                              | 1.18 $\pm$ 0.09  |
|                         | D-Fructose (300mM)              | 3.14 $\pm$ 0.90                                                              | 6.15 $\pm$ 1.78  |
|                         | D-Xylose (300mM)                | 1.03 $\pm$ 0.52                                                              | 0.68 $\pm$ 0.04  |
|                         | D-Glucose (300mM)               | 3.04 $\pm$ 0.15                                                              | 0.44 $\pm$ 0.03  |
|                         | Sucrose (300mM)                 | 0.29 $\pm$ 0.36                                                              | 0.81 $\pm$ 0.04  |
|                         | D-Ribose (300mM)                | 0.66 $\pm$ 0.42                                                              | 1.37 $\pm$ 0.06  |
|                         | L-Arabinose (300mM)             | 0.52 $\pm$ 0.17                                                              | 0.61 $\pm$ 0.03  |
| <b>Polyols</b>          | Glycerol (300mM)                | 9.76 $\pm$ 1.27                                                              | 318 $\pm$ 17.3   |
|                         | Sorbitol (300mM)                | 10.2 $\pm$ 1.38                                                              | 207 $\pm$ 9.06   |
|                         | Galactitol (300mM)              | 3.62 $\pm$ 0.84                                                              | 80.9 $\pm$ 1.86  |
|                         | Mannitol (300mM)                | 2.69 $\pm$ 0.55                                                              | NA               |
| <b>Diols</b>            | 1,2-Propanediol (300mM)         | 11.2 $\pm$ 1.69                                                              | 393 $\pm$ 11.7   |
|                         | 1,3-Propanediol (300mM)         | 11.8 $\pm$ 0.74                                                              | 576 $\pm$ 31.0   |
|                         | 1,4-Butanediol (300mM)          | 12.0 $\pm$ 0.18                                                              | 698 $\pm$ 42.3   |
|                         | 1,5-Pentanediol (300mM)         | 10.9 $\pm$ 0.58                                                              | 705 $\pm$ 135    |
|                         | 1,6-Hexanediol (300mM)          | 9.94 $\pm$ 0.70                                                              | 657 $\pm$ 71.4   |
| <b>Aldehyde</b>         | Methyl Glyoxal (5mM)            | 2.45 $\pm$ 1.45                                                              | n.m.§            |
| <b>Primary alcohols</b> | Ethanol (300mM)                 | 5.87 $\pm$ 0.80                                                              | 496 $\pm$ 32.0   |
|                         | Methanol (300mM)                | 2.07 $\pm$ 0.90                                                              | 78.6 $\pm$ 3.50  |
|                         | 1-Butanol (300mM)               | 6.32 $\pm$ 0.82                                                              | 532 $\pm$ 17.6   |
|                         | Hexanol (2.5mM)                 | 4.06 $\pm$ 0.87                                                              | 428 $\pm$ 4.66   |
|                         | Octanol (2.5mM)                 | 3.67 $\pm$ 1.48                                                              | 180 $\pm$ 10.6   |
| <b>Aryl alcohols</b>    | Benzyl alcohol (30mM)           | 11.5 $\pm$ 0.81                                                              | 569 $\pm$ 31.1   |
|                         | Cinnamyl alcohol (2.5mM)        | 5.75 $\pm$ 1.58                                                              | 541 $\pm$ 15.6   |
|                         | 4-methoxybenzyl alcohol (2.5mM) | 6.06 $\pm$ 0.80                                                              | 319 $\pm$ 17.9   |
|                         | 3-methoxybenzyl alcohol (2.5mM) | 7.46 $\pm$ 0.49                                                              | 402 $\pm$ 0.00   |
|                         | Coniferyl alcohol (5mM)         | n.m.§                                                                        | n.m.§            |
|                         | Veratryl alcohol (2.5mM)        | 4.49 $\pm$ 0.43                                                              | 160 $\pm$ 11.6   |
|                         | 4-hydroxybenzyl alcohol (2.5mM) | 1.00 $\pm$ 0.15                                                              | 10.2 $\pm$ 1.76  |
|                         | Vanillyl alcohol (2.5mM)        | n.m.§                                                                        | n.m.§            |
| <b>Furans</b>           | HMF (2.5mM)                     | 6.81 $\pm$ 1.17                                                              | 690 $\pm$ 18.6   |
|                         | HMFCa (2.5mM)                   | 10.2 $\pm$ 0.92                                                              | 272 $\pm$ 29.0   |
|                         | DFC (2.5mM)                     | 1.20 $\pm$ 0.12                                                              | n.m.§            |
|                         | FFCA (2.5mM)                    | 1.14 $\pm$ 0.09                                                              | n.m.§            |
|                         | Furfural (2.5mM)                | n.m.§                                                                        | NA               |

\*Measurements were performed in triplicate at 25 °C in 100 mM buffer in different buffers at different pH using the HRP/ABTS assay. Activities were monitored using concentrations indicated within parentheses for each substrate.

§No activity detected with a specific activity limit of detection of  $9 \times 10^{-4} \mu\text{mol}\cdot\text{min}^{-1}\cdot\text{mg}^{-1}$  using 0.23 nmole of purified *PorAlcOx* enzyme and 0.03 nmole of purified *CglAlcOx* enzyme.

**Table S11. Comparison of catalytic parameters of *FoxAlcOx*, *AflAlcOx*, *PruAAA5\_2A* (*PruAlcOx*), *PfeGalOx*, *ExeGalOx*, *MreGalOx* and *FoxGalOxB* with other enzymes acting on galactose\***

| Enzyme           | Galactose  |                              |                                                   | References |
|------------------|------------|------------------------------|---------------------------------------------------|------------|
|                  | $K_M$ (mM) | $k_{cat}$ (s <sup>-1</sup> ) | $k_{cat}/K_M$ (M <sup>-1</sup> .s <sup>-1</sup> ) |            |
| <i>FoxGalOxB</i> | 24 ±1.3    | 81 ±1.0                      | <b>3400</b>                                       | This work  |
| <i>ExeGalOx</i>  | 25 ±4.0    | 130 ±3.7                     | <b>5200</b>                                       | This work  |
| <i>MreGalOx</i>  | 64 ±4.8    | 32 ±0.7                      | <b>500</b>                                        | This work  |
| <i>AflAlcOx</i>  | 980 ± 61   | 400 ±10                      | <b>410</b>                                        | This work  |
| <i>PruAlcOx</i>  | 110 ±18    | 220 ±8.6                     | <b>2000</b>                                       | This work  |
| <i>PfeGalOx</i>  | 28 ±6.7    | 140 ±4.5                     | <b>5000</b>                                       | This work  |
| <i>FoxAlcOx</i>  | 2000 ±650  | 8.3 ±1.7                     | <b>4.1</b>                                        | This work  |
| <i>FgrGalOx</i>  | 102 ±6.4   | 1059 ±18.9                   | <b>10400 ±680</b>                                 | [1]        |
| R330K            | 895 ±85.9  | 208 ±10.8                    | <b>232 ±25</b>                                    | [1]        |
| M <sub>1</sub>   | 43 ±2      | 1376 ±35                     | <b>32 000 ±1700</b>                               | [2]        |
| M <sub>3</sub>   | 54 ±7      | 1800 ±400                    | <b>31 ±7</b>                                      | [3]        |
| C383N            | 390 ±38    | 410 ±17                      | <b>1100 ±150</b>                                  | [4]        |
| C383S            | 34 ±3.6    | 1100 ±30                     | <b>32000 ±4500</b>                                | [4]        |
| <i>CgrAAO</i>    | ND         | ND                           | <b>13.1 ±0.8</b>                                  | [5]        |
| <i>FgrAAO</i>    | 1700 ± 150 | 21 ± 1.0                     | <b>12</b>                                         | [6]        |
| <i>FoxAAO</i>    | 1600 ± 150 | 23 ± 1.2                     | <b>14</b>                                         | [6]        |

\* ND not determined

**Table S12. Comparison of catalytic parameters of *PorAlcOx*, *CglAlcOx*, *FoxAlcOx*, *AflAlcOx*, *PruAA5\_2A* (*PruAlcOx*), *PfeGalOx*, *UmaRafOx*, *PhuRafOx*, *AsyAlcOx* with other enzymes acting on benzyl alcohol, glycerol, butanol and 1,4-butanediol\***

| Enzyme          | <i>Benzyl alcohol</i> |                              |                                                   | <i>Glycerol</i>       |                              |                                                   | References |
|-----------------|-----------------------|------------------------------|---------------------------------------------------|-----------------------|------------------------------|---------------------------------------------------|------------|
|                 | $K_M$ (mM)            | $k_{cat}$ (s <sup>-1</sup> ) | $k_{cat}/K_M$ (M <sup>-1</sup> .s <sup>-1</sup> ) | $K_M$ (mM)            | $k_{cat}$ (s <sup>-1</sup> ) | $k_{cat}/K_M$ (M <sup>-1</sup> .s <sup>-1</sup> ) |            |
| <i>PorAlcOx</i> | 8.6 ±0.15             | 1.3 ±0.10                    | <b>6600</b>                                       | 8.5 ±0.32             | 57 ± 8.1                     | <b>1500</b>                                       | This work  |
| <i>CglAlcOx</i> | 350 ±20               | 3.6 ±0.8                     | <b>97000</b>                                      | NA                    | NA                           | <b>NA</b>                                         | This work  |
| <i>FoxAlcOx</i> | 230 ±70               | 24 ±4.5                      | <b>100</b>                                        | NA                    | NA                           | <b>NA</b>                                         | This work  |
| <i>AflAlcOx</i> | 410 ±11               | 19 ± 1.9                     | <b>21000</b>                                      | NA                    | NA                           | <b>NA</b>                                         | This work  |
| <i>PruAlcOx</i> | 110 ±5.0              | 9.2 ±1.8                     | <b>12000</b>                                      | 170 ±3.0              | 34 ±1.7                      | <b>4900</b>                                       | This work  |
| <i>PfeGalOx</i> | NA                    | NA                           | <b>NA</b>                                         | 140 ±1.1              | 69 ±1.6                      | <b>2000</b>                                       | This work  |
| <i>UmaRafOx</i> | NA                    | NA                           | <b>NA</b>                                         | 2900 ±720             | 130 ±24                      | <b>45</b>                                         | This work  |
| <i>PhuRafOx</i> | NA                    | NA                           | <b>NA</b>                                         | 2900 ±390             | 56 ±3.8                      | <b>19</b>                                         | This work  |
| <i>AsyAlcOx</i> | 79 ±22                | 17 ±1.8                      | <b>220</b>                                        | 700 ±80               | 38 ±2.0                      | <b>54</b>                                         | This work  |
| <i>FgrGalOx</i> | ND                    | ND                           | <b>424 ±2</b>                                     | NA                    | NA                           | <b>NA</b>                                         | [7]        |
| <i>CgrAlcOx</i> | 0.69 ±0.04            | 94 ±1                        | <b>140000</b>                                     | 104 ± 4               | 96 ± 2                       | <b>920</b>                                        | [8]        |
| <i>CgrAAO</i>   | 27 ±0.9               | 54.5 ±0.6                    | <b>2020 ± 70</b>                                  | 605 ± 34              | 58.7 ± 0.9                   | <b>97 ± 5.6</b>                                   | [5]        |
| <i>FgrAAO</i>   | 86 ± 12               | 37 ± 2.8                     | <b>430</b>                                        | 2200 ± 360            | 17 ± 1.2                     | <b>7.7</b>                                        | [6]        |
| <i>FoxAAO</i>   | 30 ± 19               | 31 ± 4.2                     | <b>1000</b>                                       | 2700 ± 403            | 24 ± 1.6                     | <b>8.8</b>                                        | [6]        |
| Enzyme          | <i>Butanol</i>        |                              |                                                   | <i>1,4-Butanediol</i> |                              |                                                   | References |
|                 | $K_M$ (mM)            | $k_{cat}$ (s <sup>-1</sup> ) | $k_{cat}/K_M$ (M <sup>-1</sup> .s <sup>-1</sup> ) | $K_M$ (mM)            | $k_{cat}$ (s <sup>-1</sup> ) | $k_{cat}/K_M$ (M <sup>-1</sup> .s <sup>-1</sup> ) |            |
| <i>PorAlcOx</i> | 7.9 ±0.09             | 4.6 ± 0.30                   | <b>1700</b>                                       | 9.5 ±0.51             | 4.3 ± 0.56                   | <b>2200</b>                                       | This work  |
| <i>CglAlcOx</i> | NA                    | NA                           | <b>NA</b>                                         | 330 ±13               | 3.9 ±0.4                     | <b>85000</b>                                      | This work  |
| <i>CgrAAO</i>   | 0.68 ± 0.04           | 96 ± 1                       | <b>140000</b>                                     | 1.2 ± 0.04            | 97 ± 1                       | <b>83000</b>                                      | [8]        |

\* NA not assessed; ND not determined

**Table S13. Comparison of catalytic parameters of *CglAlcOx* and *AflAlcOx* with other enzymes acting on HMF**

| Enzyme          | HMF          |                        |                                   | References |
|-----------------|--------------|------------------------|-----------------------------------|------------|
|                 | $K_M$ (mM)   | $k_{cat}$ ( $s^{-1}$ ) | $k_{cat}/K_M$ ( $M^{-1}.s^{-1}$ ) |            |
| <i>CglAlcOx</i> | 0.09 ± 0.01  | 240 ± 16               | <b>2700000</b>                    | This work  |
| <i>AflAlcOx</i> | 190 ± 20     | 5.0 ± 1.3              | <b>38000</b>                      | This work  |
| <i>CgrAAO</i>   | 6.5 ± 0.3    | 126 ± 1.5              | <b>19400 ± 90</b>                 | [5]        |
| <i>FgrAAO</i>   | 14 ± 2.6     | 29 ± 1.7               | <b>2100</b>                       | [6]        |
| <i>FoxAAO</i>   | 17 ± 4.9     | 26 ± 2.6               | <b>1500</b>                       | [6]        |
| Bacterial HMFO  | 1.4          | 9.9                    | <b>7100</b>                       | [9]        |
| <i>PerAAO</i>   | 1.6 ± 0.2    | 0.33 ± 0.01            | <b>220 ± 42</b>                   | [10]       |
| <i>MtGLOX</i>   | 20.2 ± 9.0   | 15.9                   | <b>982</b>                        | [11]       |
| <i>PciGLOX1</i> | 15.66 ± 2.35 | 1.59 ± 0.12            | <b>101.66 ± 0.01</b>              | [12]       |
| <i>PciGLOX2</i> | 5.87 ± 2.04  | 0.56 ± 0.09            | <b>96.04 ± 0.01</b>               | [12]       |
| <i>PciGLOX3</i> | 6.35 ± 1.32  | 0.75 ± 0.07            | <b>118.35 ± 0.01</b>              | [12]       |

Supplementary Figures

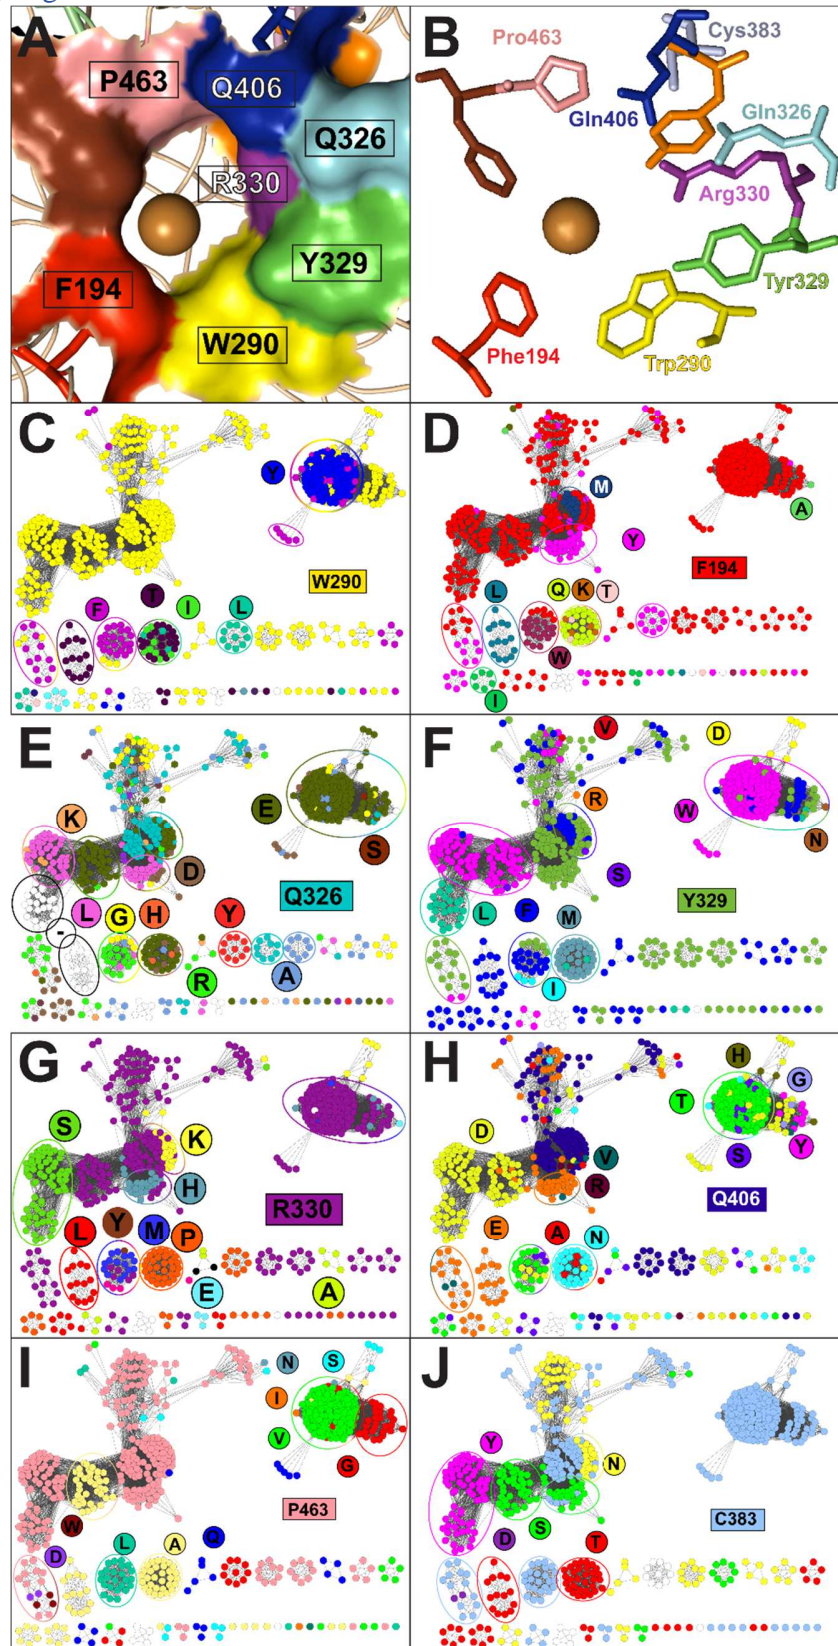

**Figure S1: (A-B) Active site residues of *FgrGalOx* involved in catalysis and/or substrate binding investigated in this study. (A) Surface representation (B) Sticks representation (C-J) Sequence similarity networks at an alignment score cut-off of  $10^{-550}$  of 623 catalytic modules from the AA5\_2 subfamily with their corresponding amino acid variability for a specific position in *FgrGalOx*. For each panel, predicted native signal peptides and additional N-terminal modules have been removed. Each node is colored according to its variability assessed by inspecting the multiple sequence alignment used to generate the phylogenetic tree and the SSNs in Figure 1.**

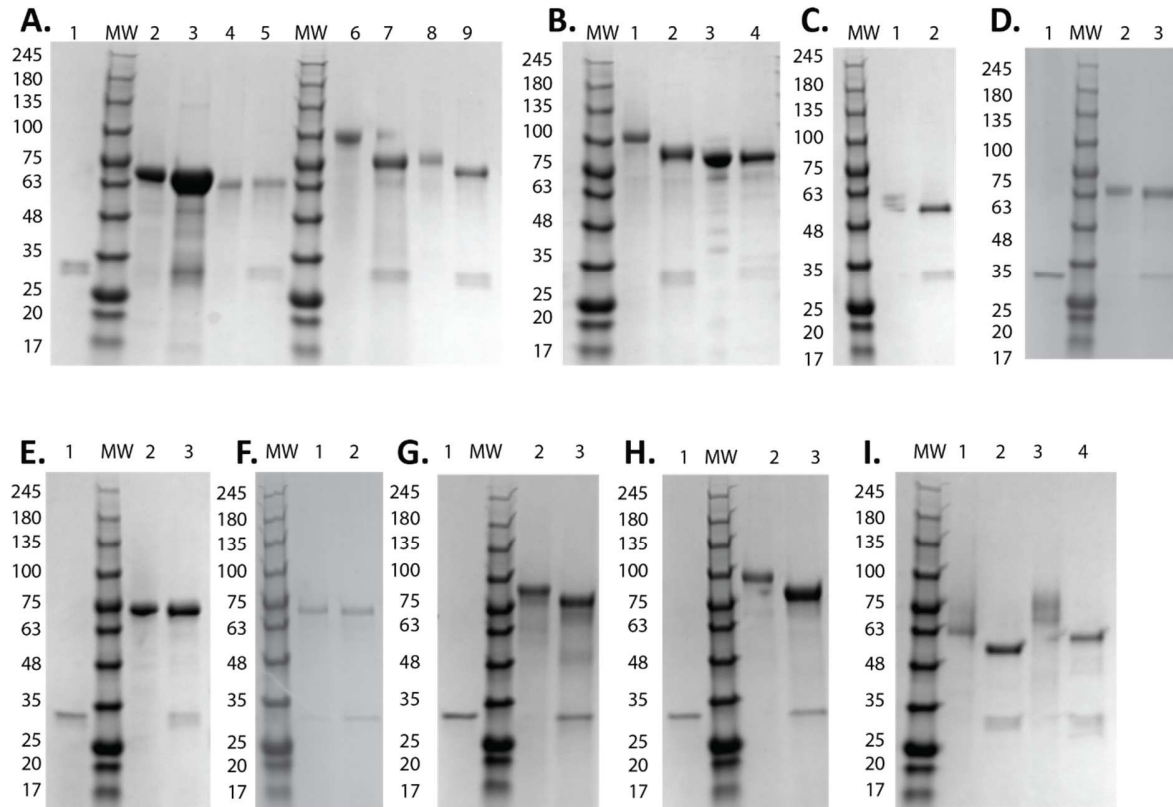

**Figure S2. SDS-PAGE of recombinantly produced enzyme in *P. pastoris* and N-deglycosylation study.** Aliquot of purified enzymes were N-glycosylated under denaturing conditions with pNGaseF. A. 1: pNGase, 2: native *UmaRafOx* (2.5  $\mu$ g), 3: *UmaRafOx* (2.5  $\mu$ g) + pNGase, 4: native *PhuRafOx*, 5: *PhuRafOx* (2.5  $\mu$ g) + pNGase, 6: native *AlfAlcOx* (2.5  $\mu$ g), 7: *AlfAlcOx* (2.5  $\mu$ g) + pNGase, 8: native *PruAA5\_2A* (*PruAlcOx*) (2.5  $\mu$ g), 9: *PruAA5\_2A* (*PruAlcOx*) (2.5  $\mu$ g) + pNGase. B. 1: native *ExeGalOx* (2.5  $\mu$ g), 2: *ExeGalOx* (2.5  $\mu$ g) + pNGase, 3: native *MreGalOx* (2.5  $\mu$ g), 4: *MreGalOx* (2.5  $\mu$ g) + pNGase. C. 1: native *CglAlcOx* (2.5  $\mu$ g), 2: *CglAlcOx* (2.5  $\mu$ g) + pNGase. D. 1: pNGaseF, 2: native *PorAlcOx* (2.5  $\mu$ g), 3: *PorAlcOx* (2.5  $\mu$ g) + pNGase. E. 1: pNGase, 2: native *FoxAlcOx* (2.5  $\mu$ g), 3: *FoxAlcOx* (2.5  $\mu$ g) + pNGase. F. 1: native *FoxGalOxB* (2.5  $\mu$ g), 2: *FoxGalOxB* (2.5  $\mu$ g) + pNGase. G. 1: pNGase, 2: native *PfeGalOx* (2.5  $\mu$ g), 3: *PfeGalOx* (2.5  $\mu$ g) + pNGase. H. 1: pNGase, 2: native *AsyAlcOx* (2.5  $\mu$ g), 3: *AsyAlcOx* (2.5  $\mu$ g) + pNGase. I. 1: native *StoAA5* (2.5  $\mu$ g), 2: *StoAA5* (2.5  $\mu$ g) + pNGase, 3: native *CcaAA5* (2.5  $\mu$ g), 4: *CcaAA5* (2.5  $\mu$ g) + pNGase. All gels were stained by Coomassie blue. MW = molecular weight markers, as indicated.

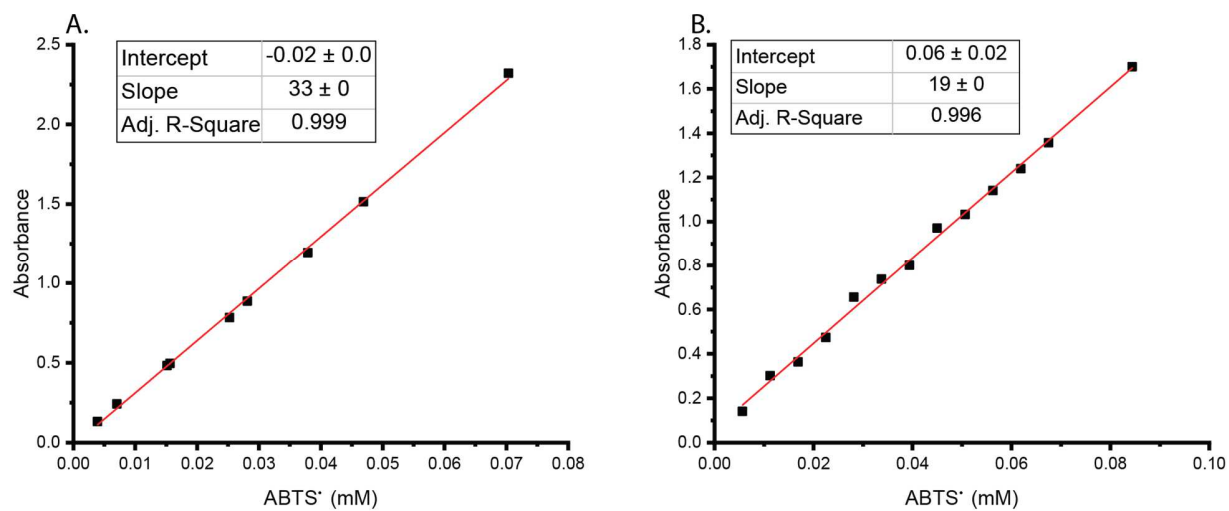

**Figure S3. ABTS radical standard curve.** A. Carry UV-VIS. B. BioTek Epoch microplate spectrophotometer.



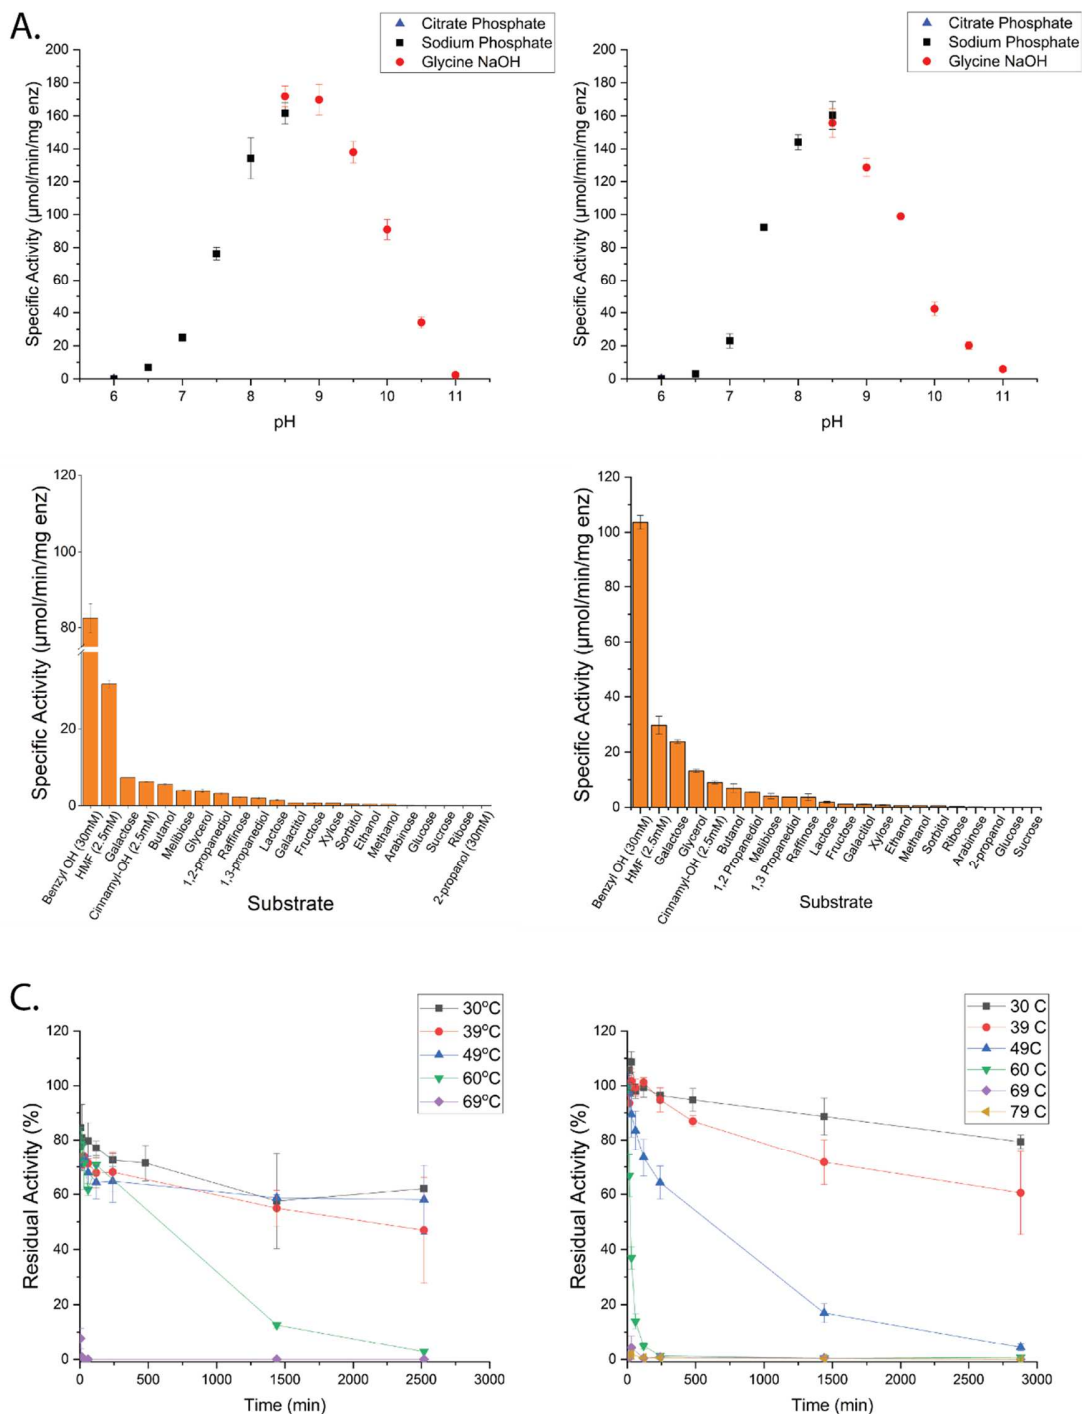

**Figure S4. Proof-of-concept experiment for medium through-put HRP-ABST plate assays using *AfIalCox*.** A. pH profiles. B. Substrate activity screens. C. Temperature stability assay. Left panels correspond to experiments performed using Cary 60 UV-VIS spectrometer while the right panel corresponds to the experiments performed using the BioTek Epoch microplate spectrophotometer.

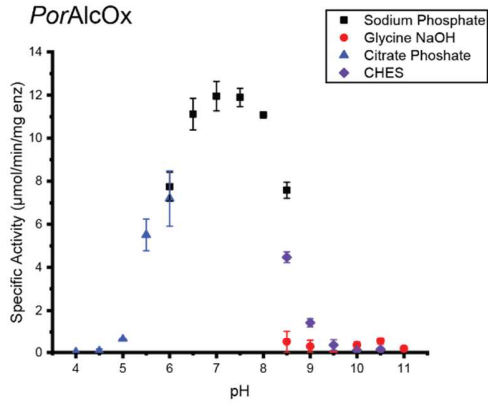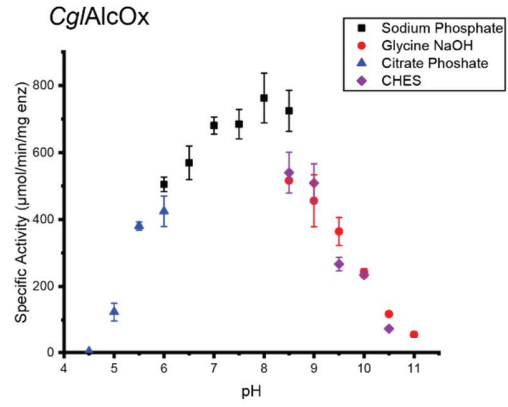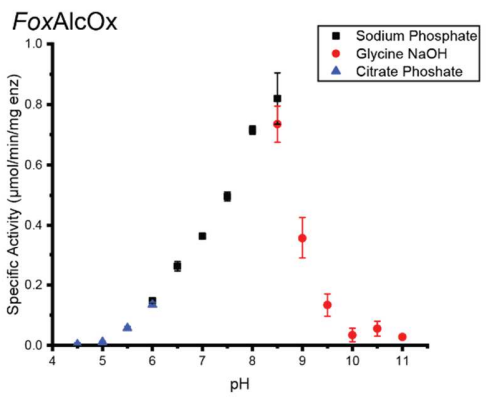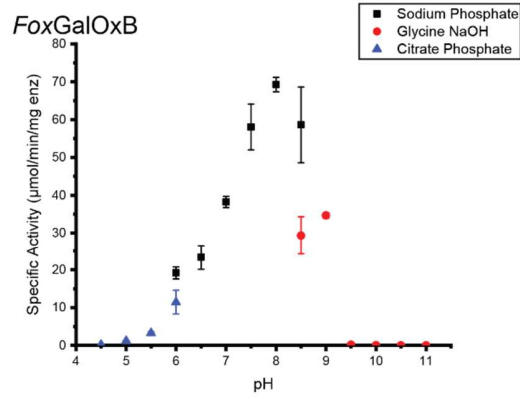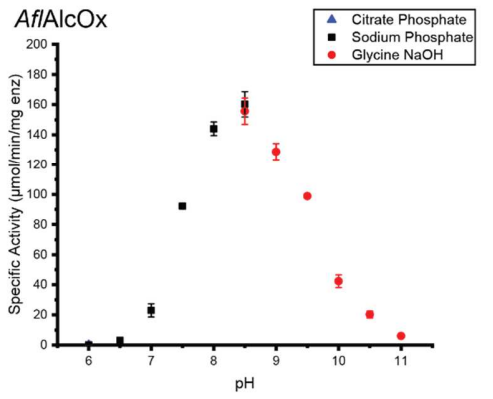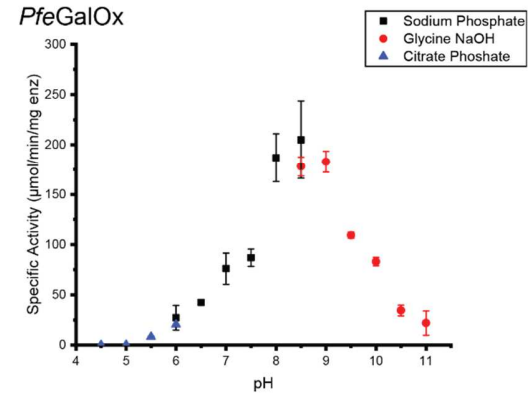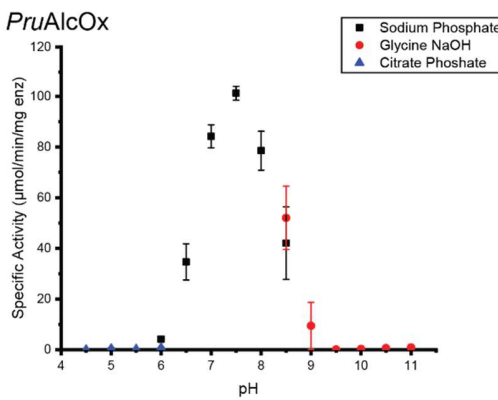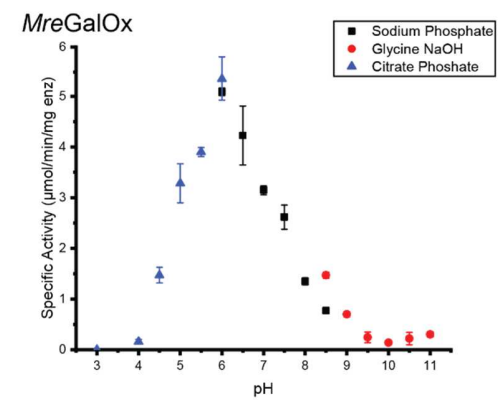

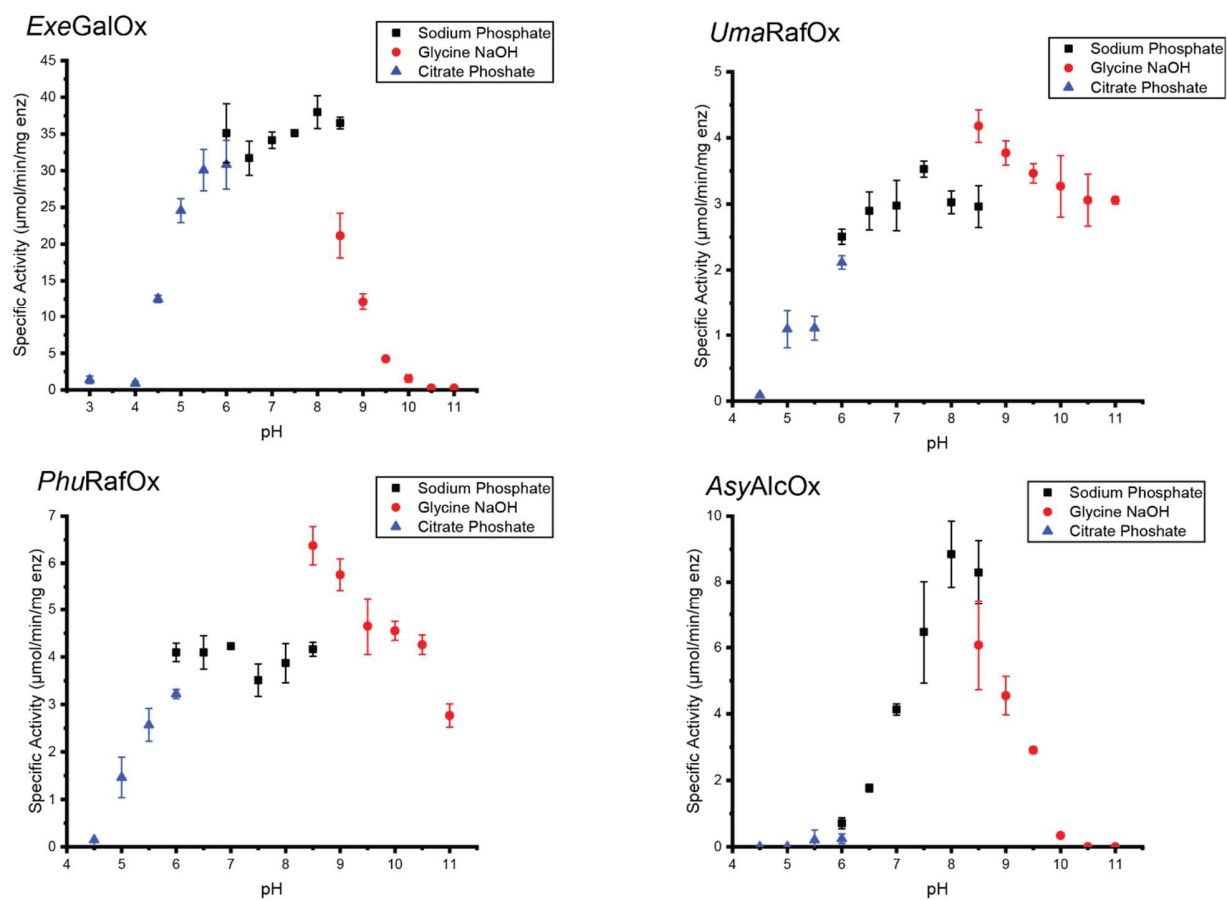

**Figure S5. pH-rate profiles.** pH-rate profiles were determined using the coupled HRP-ABTS assay with either 300 mM galactose, 30 mM benzyl alcohol, and 300 mM glycerol as the substrate at each pH value. Black squares for phosphate-citrate buffer, red circles for sodium phosphate buffer and blue triangles for glycine-NaOH buffer. The enzyme under study is annotated in each graph. Error bars represent standard deviations over three replicates.

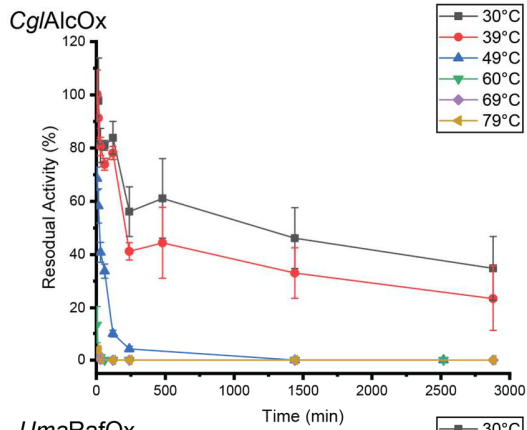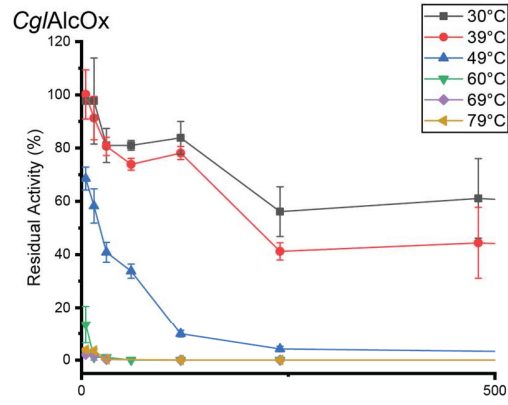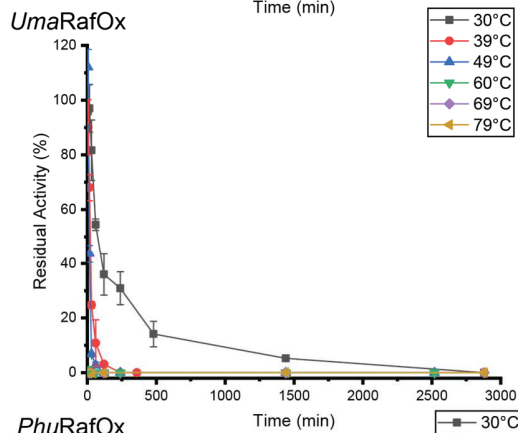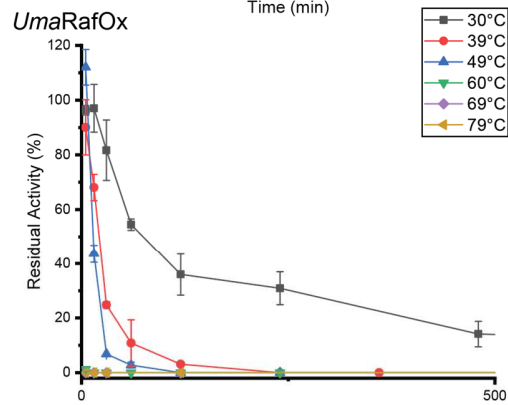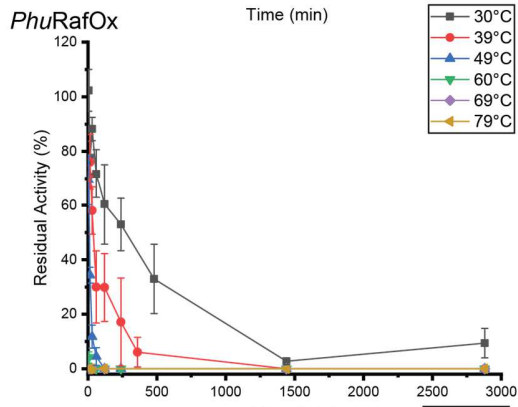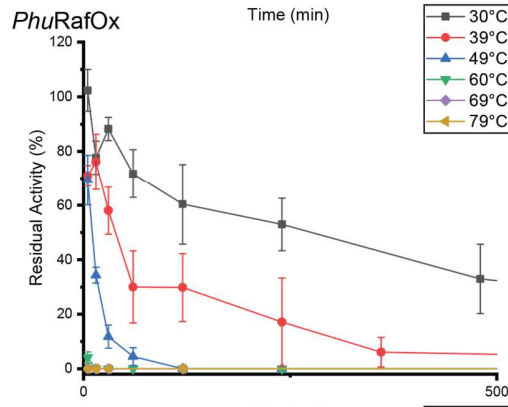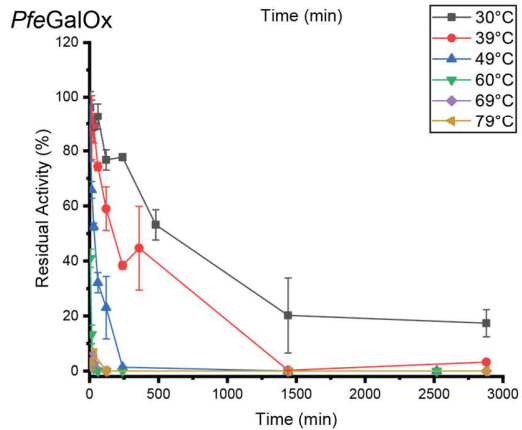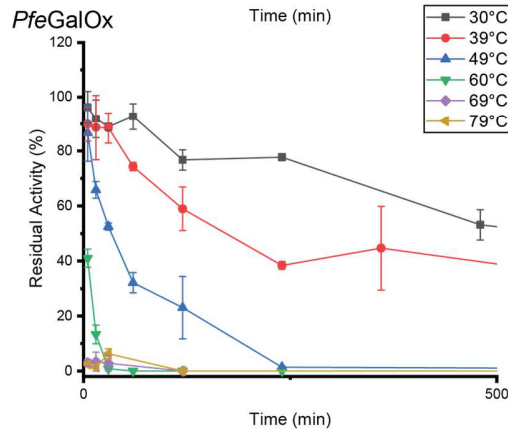

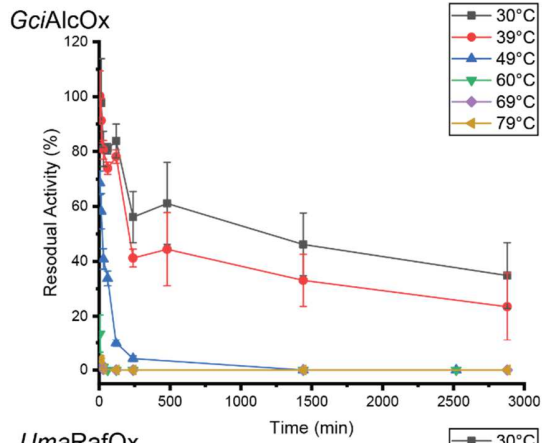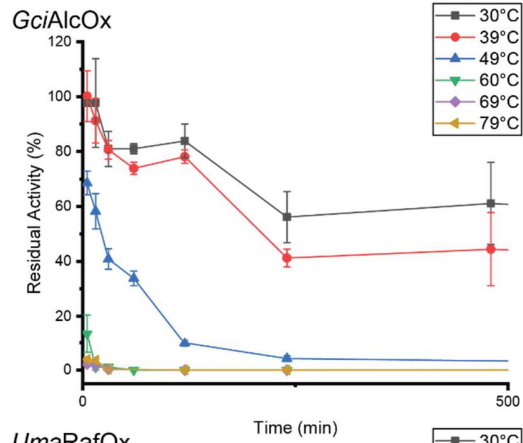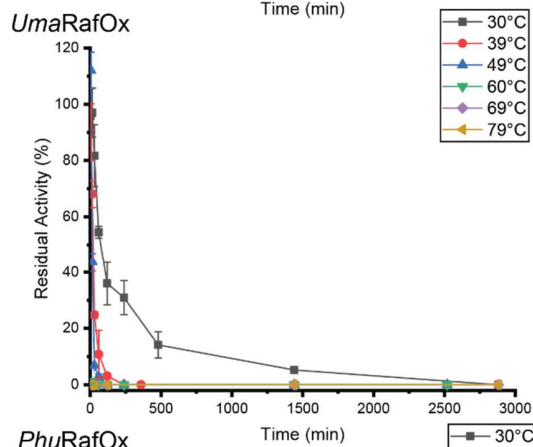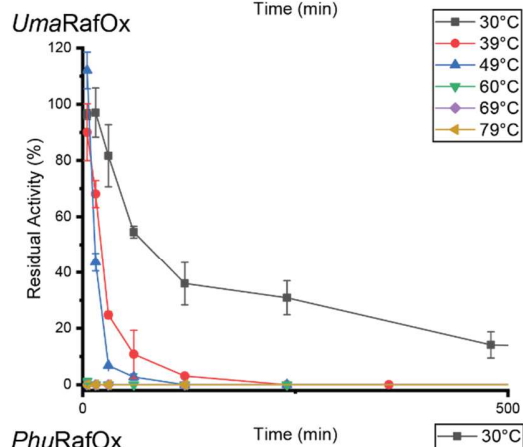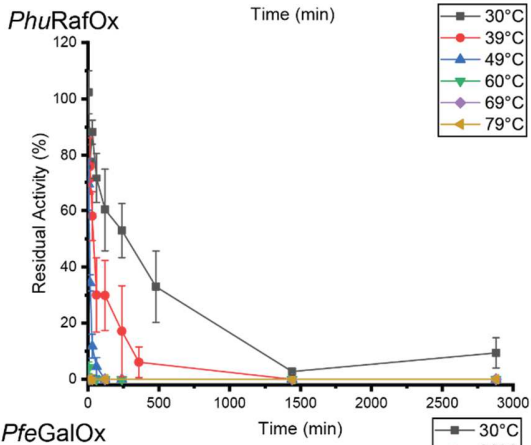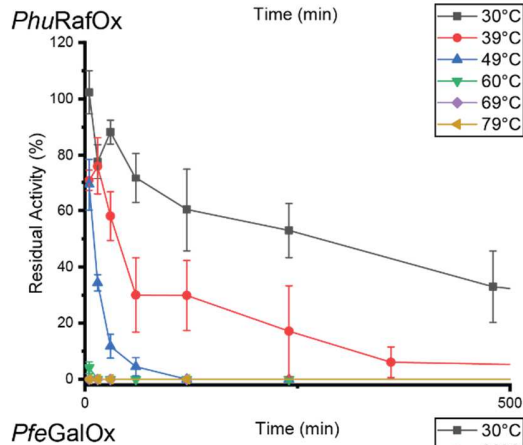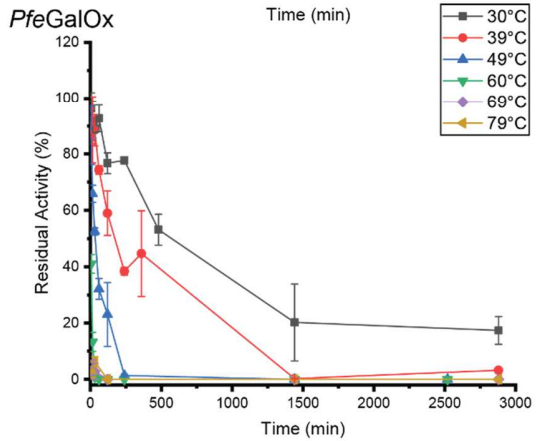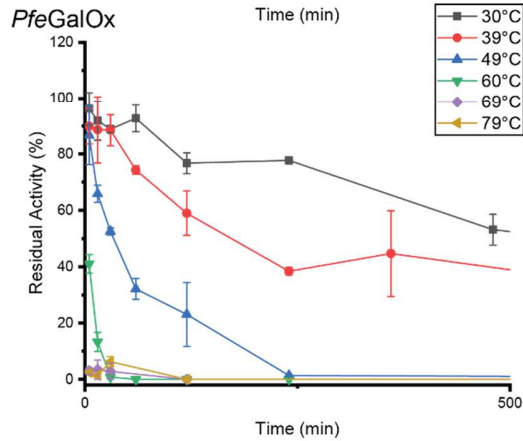

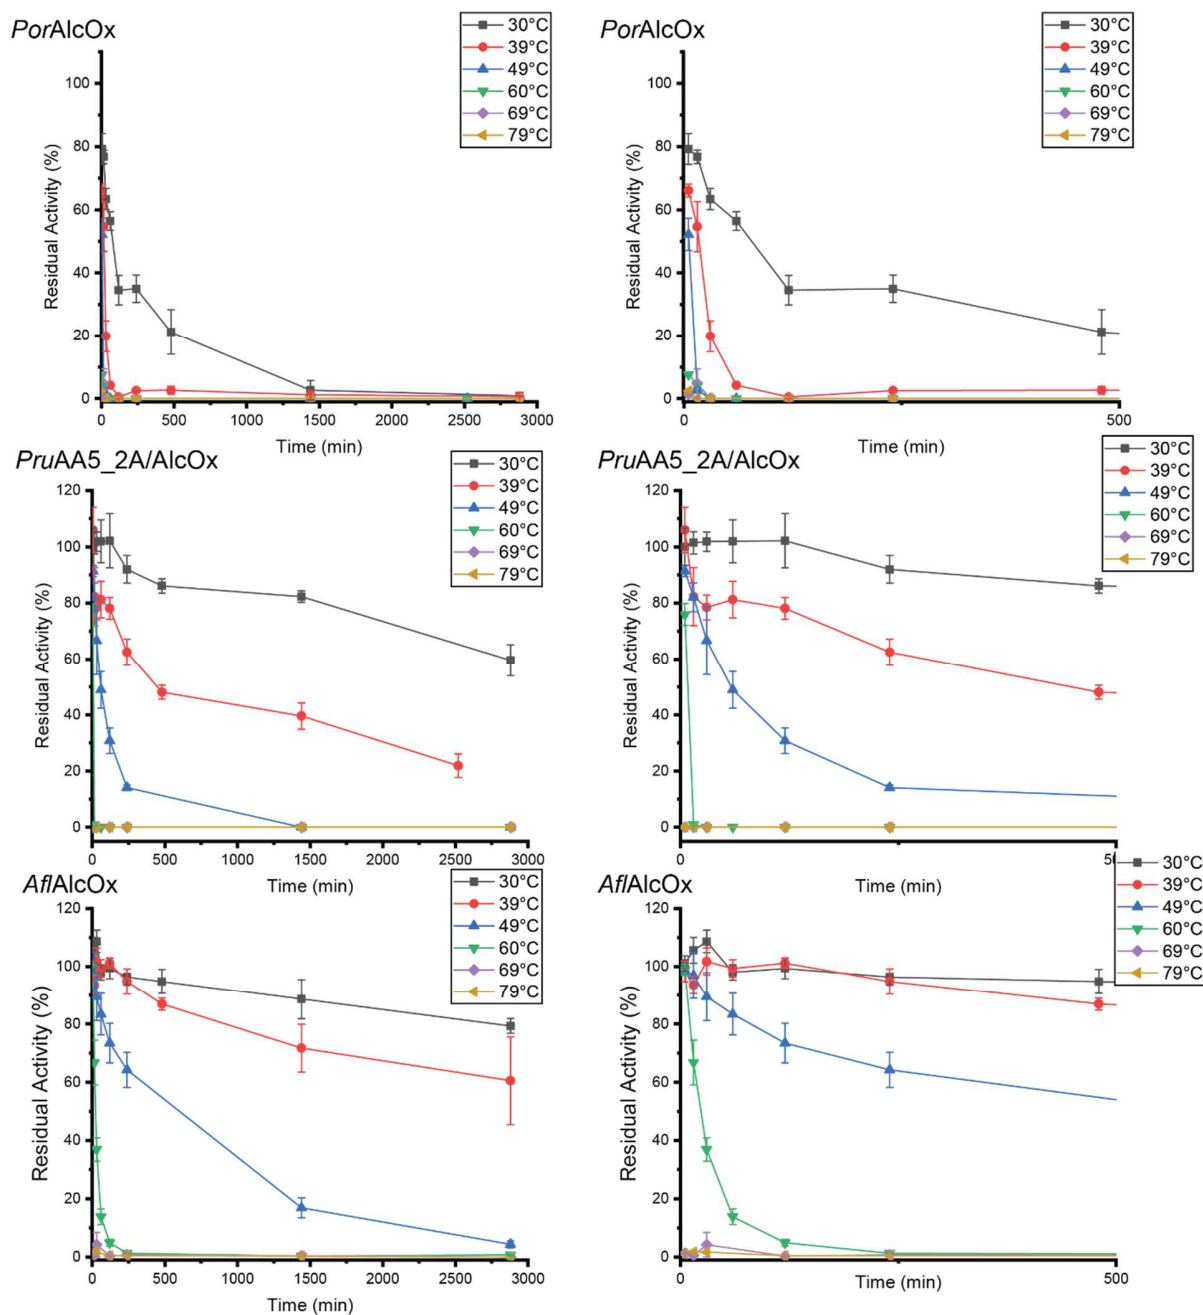

**Figure S6. Temperature stability.** Activity values were determined using the coupled HRP-ABTS assay with either 300 mM galactose, 30 mM benzyl alcohol and 300 mM glycerol as the substrate. The enzyme was pre-incubated at each temperature, maintained by a gradient thermocycler: 30 °C (black square), 39 °C (red circle), 49 °C (blue triangle), 60 °C (green triangle), 69 °C (purple diamond) and 79 °C (yellow side triangle). The reactions were performed at RT. The enzyme under study is annotated in each graph. Error bars represent standard deviations over duplicate measurements. Graphs in the left column contain the full data over 48 hours while on the right column is a zoomed in graph showing the first 500 min.

A.

*ExeGalOx*

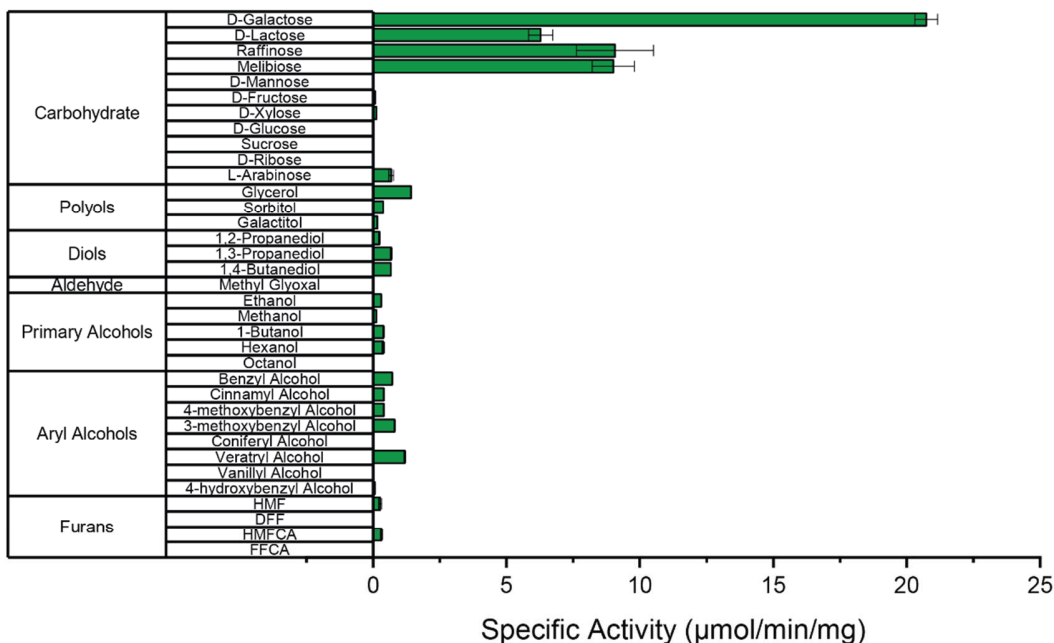

B.

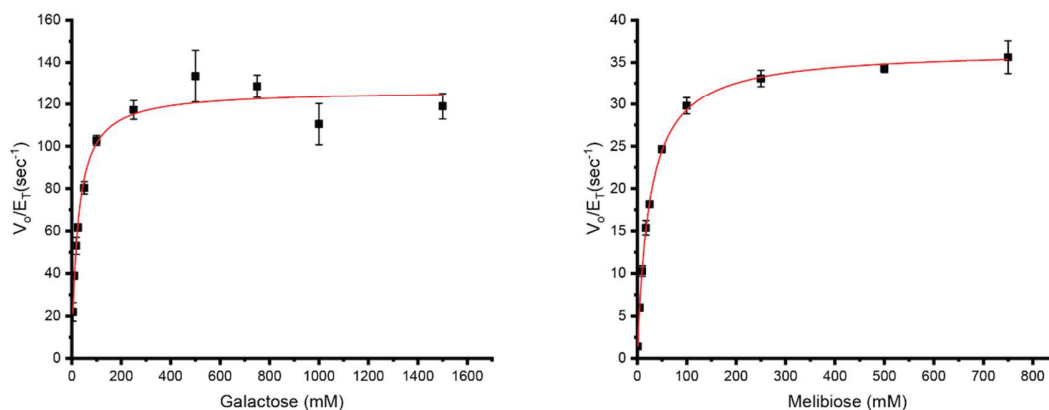

**Figure S7. *ExeGalOx* kinetics.** A. Specific activities. Measurements were performed in triplicate at RT in 100 mM buffer using the HRP/ABTS assay. Activities were monitored using 300 mM for carbohydrates, polyols, diols and primary alcohols, 30 mM for benzyl alcohol and galactitol, 5 mM for methyl glyoxal and glycolaldehyde dimer, 2.5 mM for aryl alcohols and furans. B. Michaelis-Menten kinetics. Initial-rate values were measured in triplicate at each substrate concentration. Error bars represent the standard deviation from the mean values. The individual  $k_{cat}$  and  $K_M$  values were determined by performing a non-linear fitting analysis of the standard Michaelis-Menten equation to the data using OriginLab 9.55. Individual substrates are indicated in the x-axis labels and the enzyme under study is annotated in each graph.

A.  
*MreGalOx*

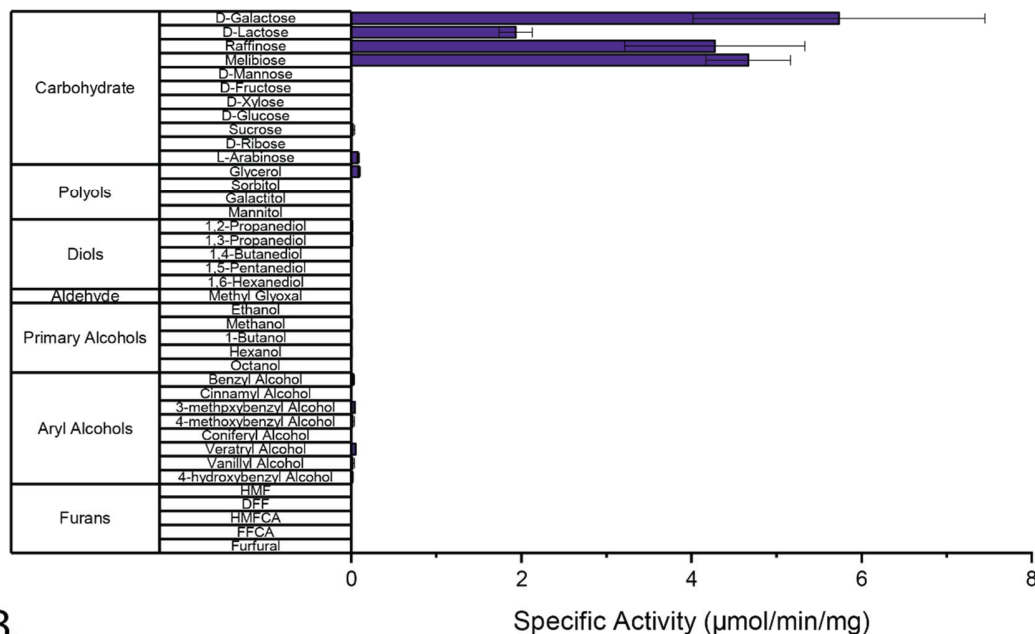

B.

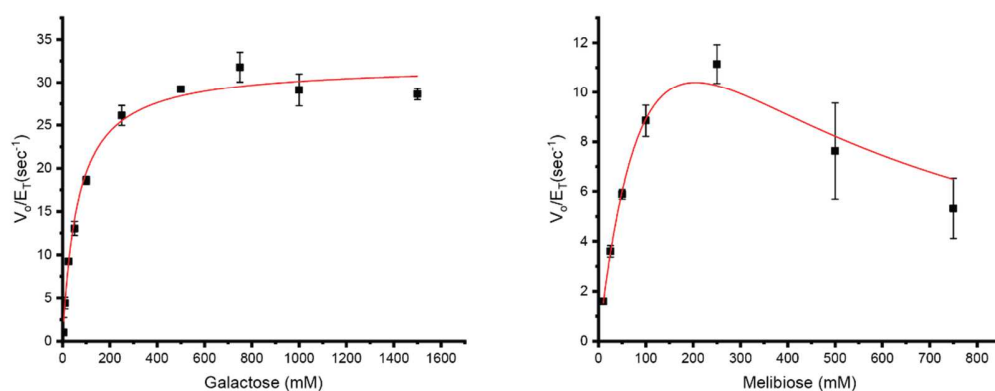

**Figure S8. *MreGalOx* kinetics.** A. Specific activities. Measurements were performed in triplicate at RT in 100 mM buffer using the HRP/ABTS assay. Activities were monitored using 300 mM for carbohydrates, polyols, diols and primary alcohols, 30 mM for benzyl alcohol and galactitol, 5 mM for methyl glyoxal and glycolaldehyde dimer, 2.5 mM for aryl alcohols and furans. B. Michaelis-Menten kinetics. Initial-rate values were measured in triplicate at each substrate concentration. Error bars represent the standard deviation from the mean values. The individual  $k_{cat}$  and  $K_M$  values were determined by performing a non-linear fitting analysis of the standard Michaelis-Menten equation to the data using OriginLab 9.55. Melibiose that did not display saturation kinetics due to substrate inhibition, therefore  $k_{cat}/K_M$  values were obtained from the slope of linear fittings. Individual substrates are indicated in the x-axis labels and the enzyme under study is annotated in each graph.



## A. *FoxGalOxB*

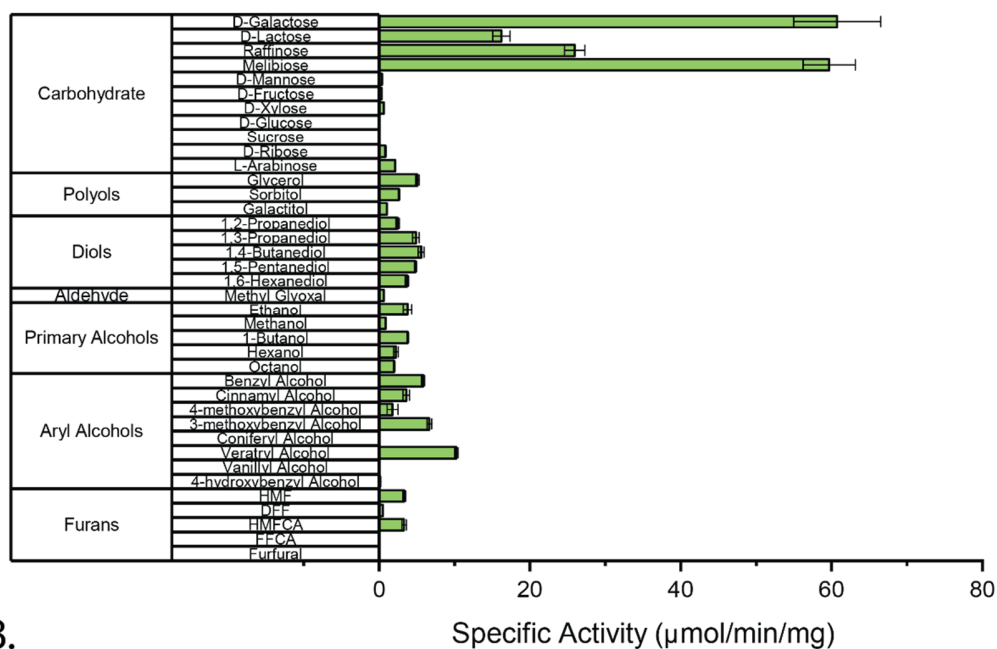

## B.

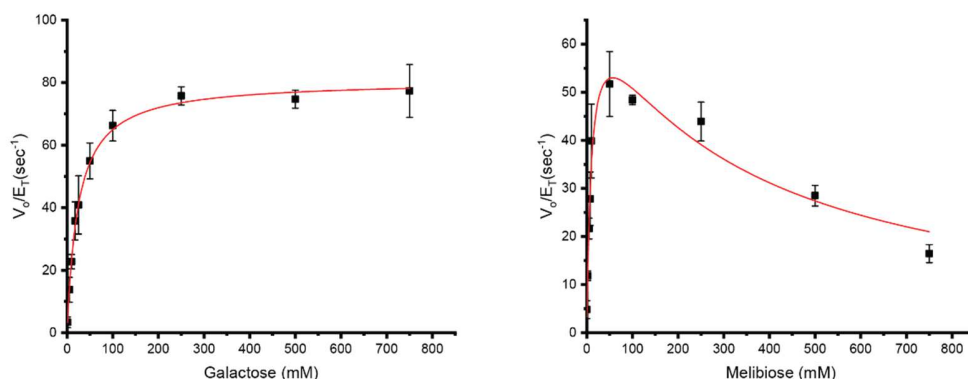

**Figure S9. *FoxGalOxB* kinetics.** A. Specific activities. Measurements were performed in triplicate at RT in 100 mM buffer using the HRP/ABTS assay. Activities were monitored using 300 mM for carbohydrates, polyols, diols and primary alcohols, 30 mM for benzyl alcohol and galactitol, 5 mM for methyl glyoxal and glycolaldehyde dimer, 2.5 mM for aryl alcohols and furans. B. Michaelis-Menten kinetics. Initial-rate values were measured in triplicate at each substrate concentration. Error bars represent the standard deviation from the mean values. The individual  $k_{cat}$  and  $K_M$  values were determined by performing a non-linear fitting analysis of the standard Michaelis-Menten equation to the data using OriginLab 9.55. Melibiose that did not display saturation kinetics due to substrate inhibition, therefore  $k_{cat}/K_M$  values were obtained from the slope of linear fittings. Individual substrates are indicated in the x-axis labels and the enzyme under study is annotated in each graph.

A. *PfeGalOx*

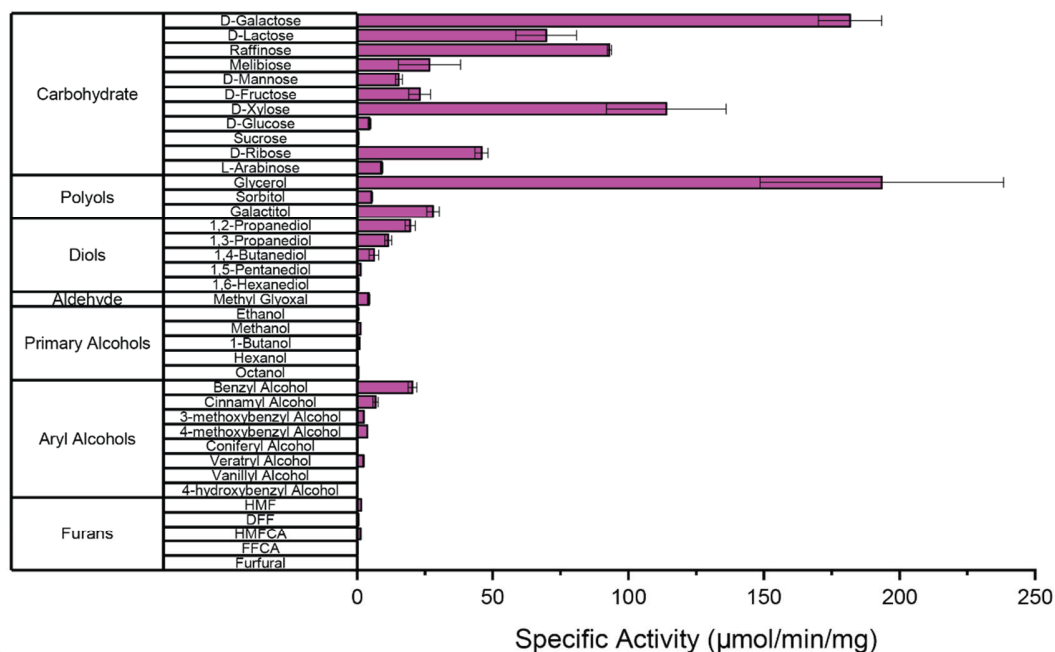

B.

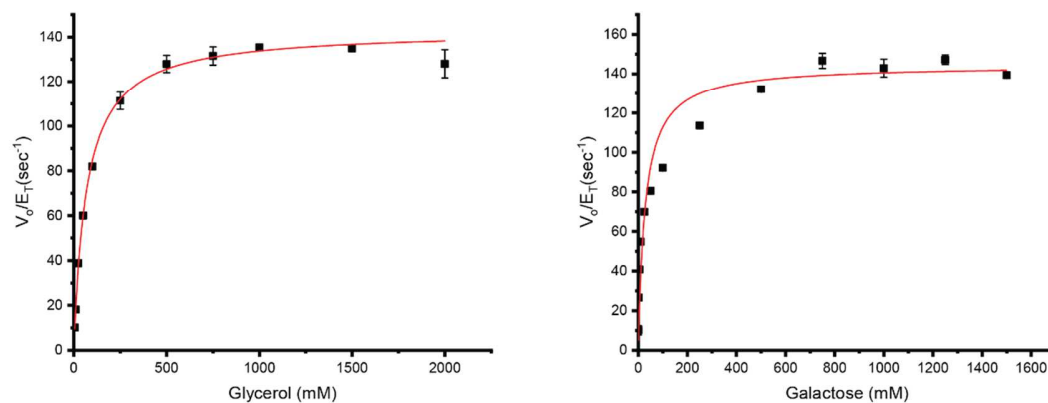

**Figure S10. *PfeGalOx* kinetics.** A. Specific activities. Measurements were performed in triplicate at RT in 100 mM buffer using the HRP/ABTS assay. Activities were monitored using 300 mM for carbohydrates, polyols, diols and primary alcohols, 30 mM for benzyl alcohol and galactitol, 5 mM for methyl glyoxal and glycolaldehyde dimer, 2.5 mM for aryl alcohols and furans. B. Michaelis-Menten kinetics. Initial-rate values were measured in triplicate at each substrate concentration. Error bars represent the standard deviation from the mean values. The individual  $k_{cat}$  and  $K_M$  values were determined by performing a non-linear fitting analysis of the standard Michaelis-Menten equation to the data using OriginLab 9.55. Individual substrates are indicated in the x-axis labels and the enzyme under study is annotated in each graph.

## A. *UmaRafOx*

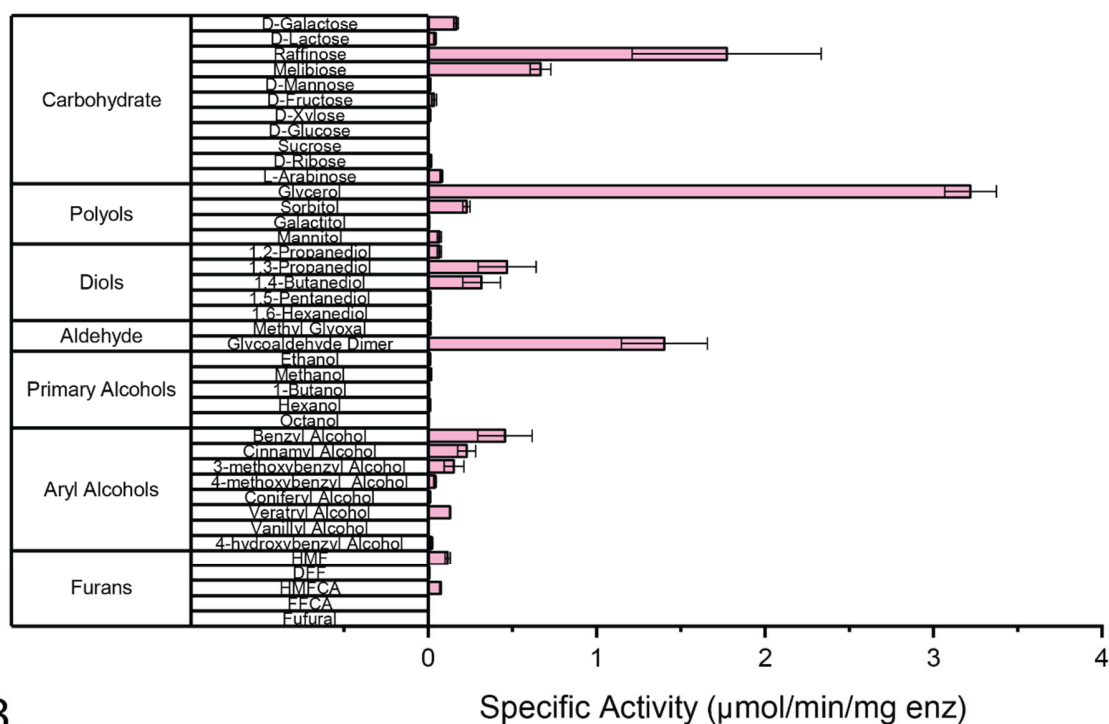

## B.

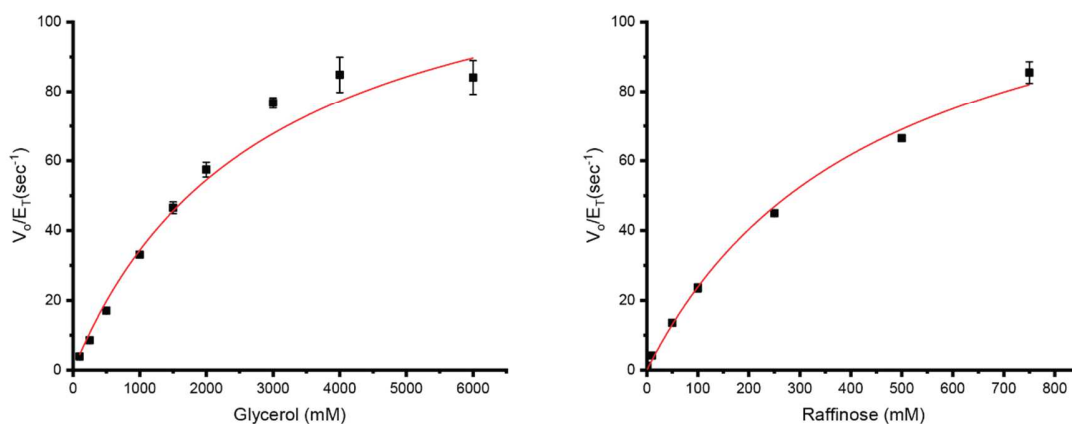

**Figure S11. *UmaRafOx* kinetics.** A. Specific activities. Measurements were performed in triplicate at RT in 100 mM buffer using the HRP/ABTS assay. Activities were monitored using 300 mM for carbohydrates, polyols, diols and primary alcohols, 30 mM for benzyl alcohol and galactitol, 5 mM for methyl glyoxal and glycolaldehyde dimer, 2.5 mM for aryl alcohols and furans. B. Michaelis-Menten kinetics. Initial-rate values were measured in triplicate at each substrate concentration. Error bars represent the standard deviation from the mean values. The individual  $k_{cat}$  and  $K_M$  values were determined by performing a non-linear fitting analysis of the standard Michaelis-Menten equation to the data using OriginLab 9.55. Individual substrates are indicated in the x-axis labels and the enzyme under study is annotated in each graph.

A.  
*PhuRafOx*

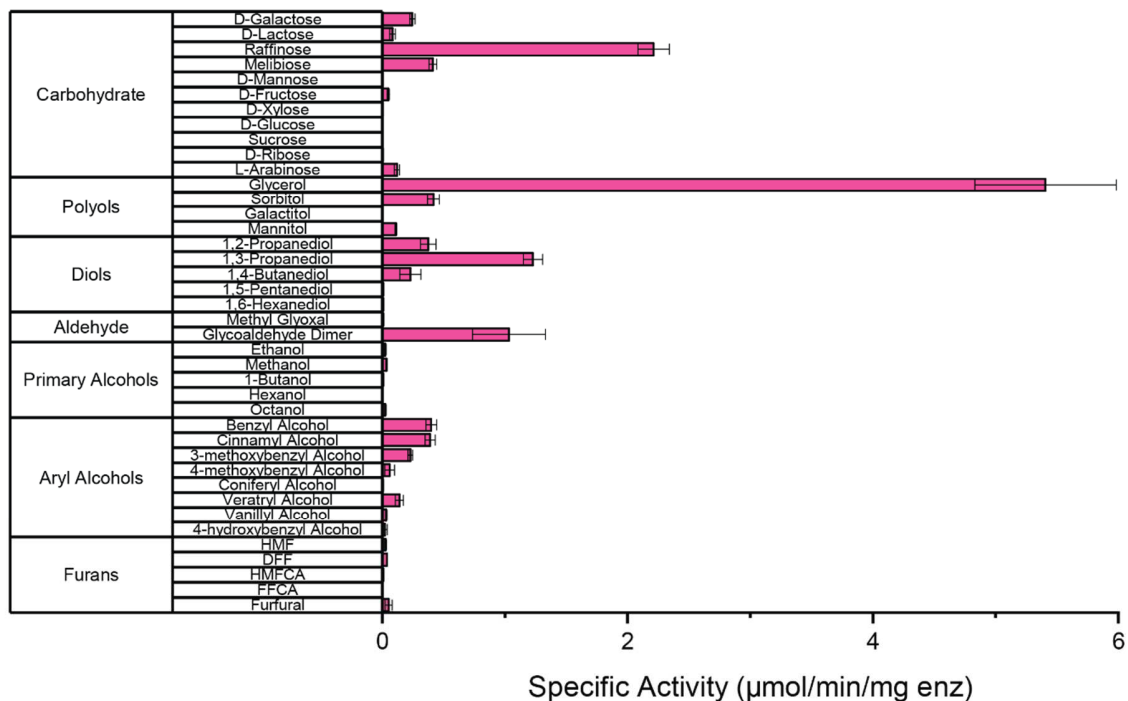

B.

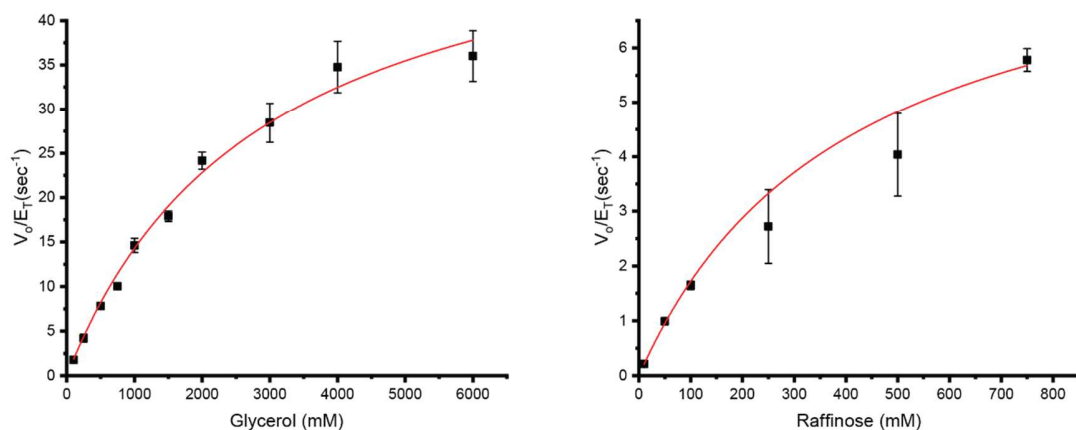

**Figure S12. *PhuRafOx* kinetics.** A. Specific activities. Measurements were performed in triplicate at RT in 100 mM buffer using the HRP/ABTS assay. Activities were monitored using 300 mM for carbohydrates, polyols, diols and primary alcohols, 30 mM for benzyl alcohol and galactitol, 5 mM for methyl glyoxal and glycoaldehyde dimer, 2.5 mM for aryl alcohols and furans. B. Michaelis-Menten kinetics. Initial-rate values were measured in triplicate at each substrate concentration. Error bars represent the standard deviation from the mean values. The individual  $k_{cat}$  and  $K_M$  values were determined by performing a non-linear fitting analysis of the standard Michaelis-Menten equation to the data using OriginLab 9.55. Individual substrates are indicated in the x-axis labels and the enzyme under study is annotated in each graph.

A.

*Afi*/AlcOx

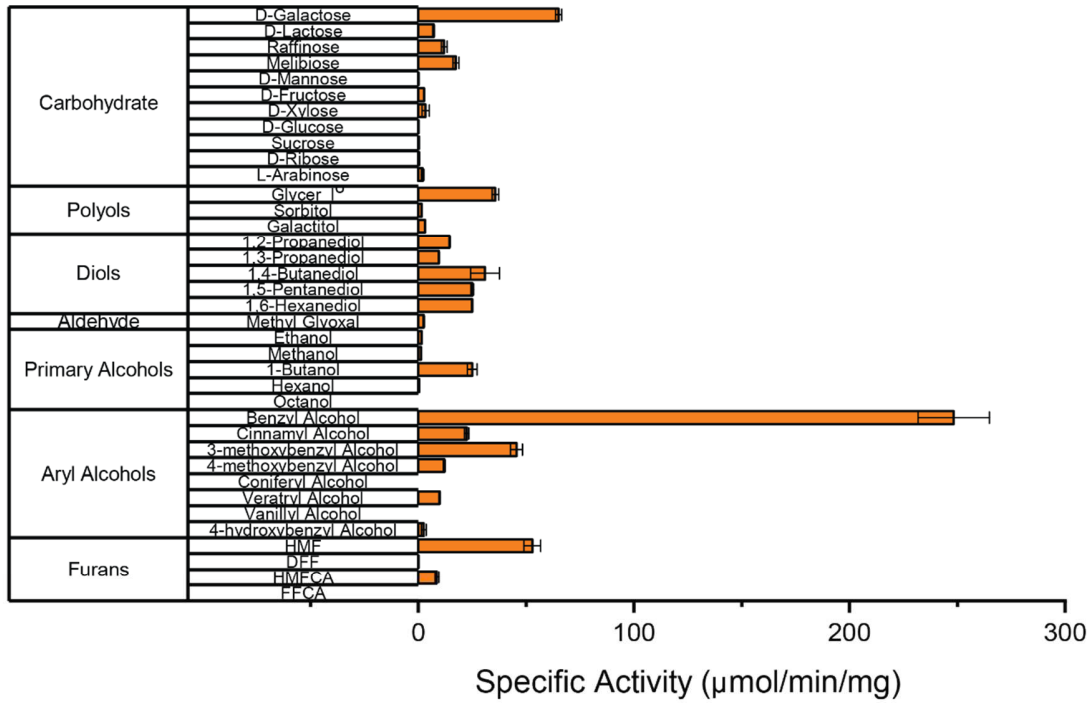

B.

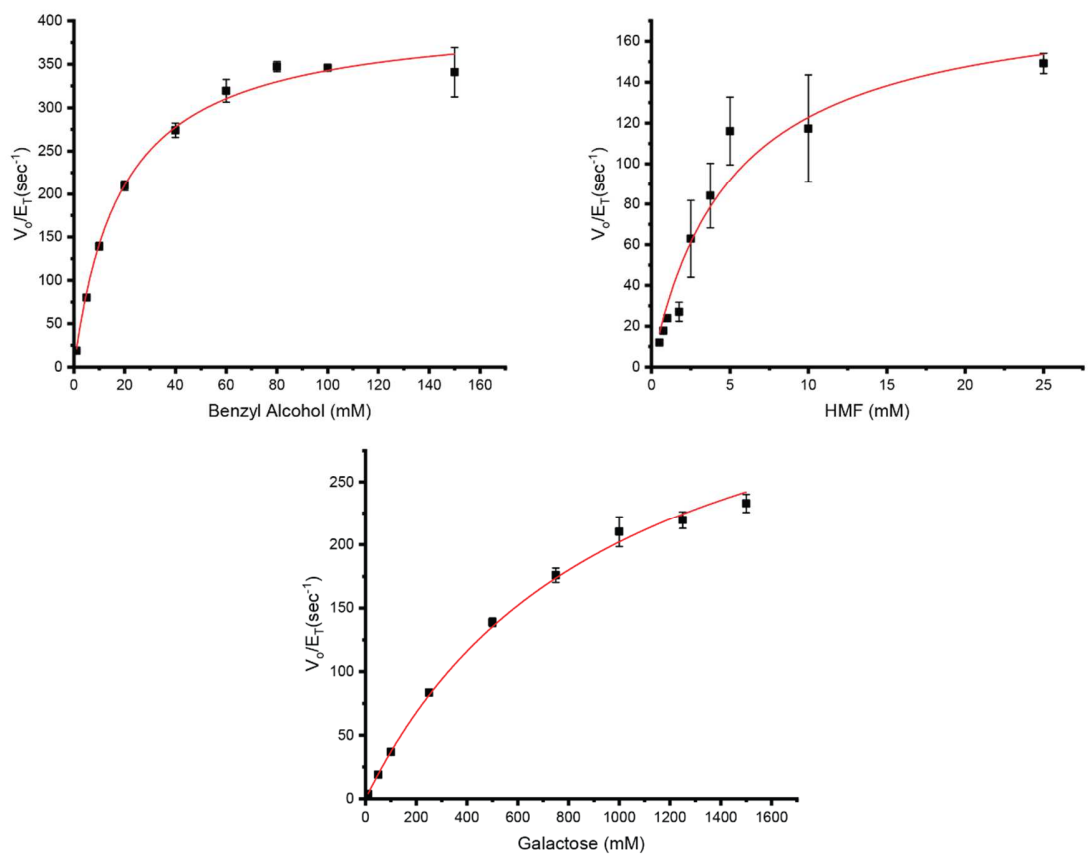

**Figure S13. *Af*/AlcOx kinetics.** A. Specific activities. Measurements were performed in triplicate at RT in 100 mM buffer using the HRP/ABTS assay. Activities were monitored using 300 mM for carbohydrates, polyols, diols and primary alcohols, 30 mM for benzyl alcohol and galactitol, 5 mM for methyl glyoxal and glycolaldehyde dimer, 2.5 mM for aryl alcohols and furans. B. Michaelis-Menten kinetics. Initial-rate values were measured in triplicate at each substrate concentration. Error bars represent the standard deviation from the mean values. The individual  $k_{\text{cat}}$  and  $K_{\text{M}}$  values were determined by performing a non-linear fitting analysis of the standard Michaelis-Menten equation to the data using OriginLab 9.55. Individual substrates are indicated in the x-axis labels and the enzyme under study is annotated in each graph.

A. *PruAA5\_2A/AlcOx*

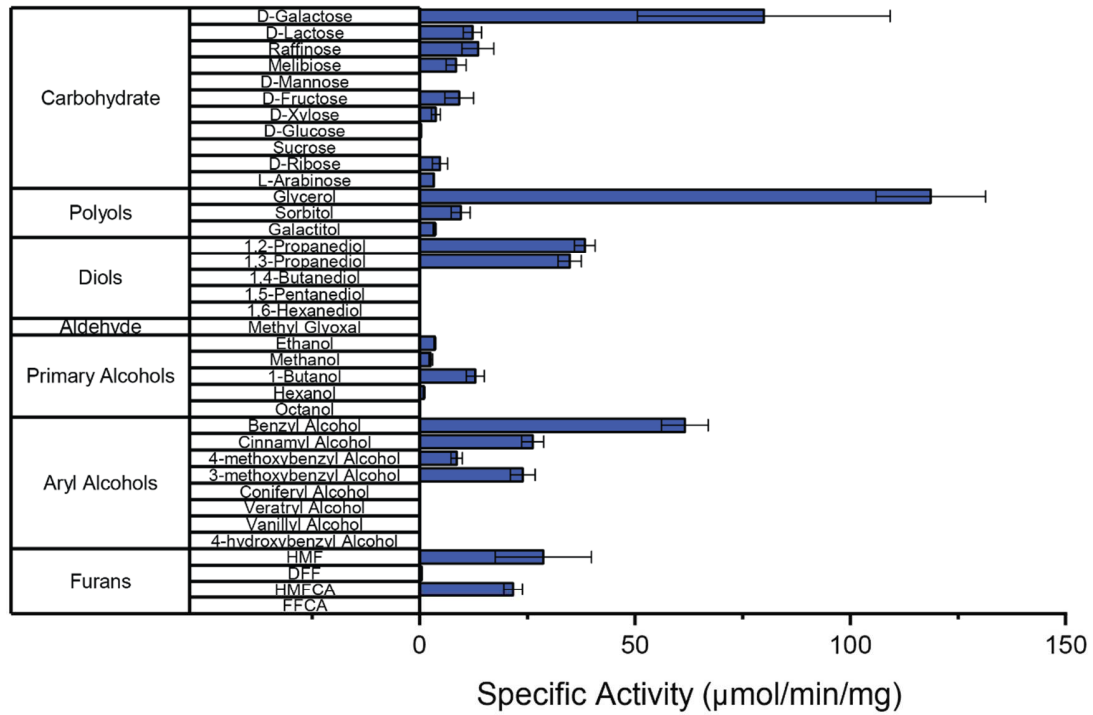

B.

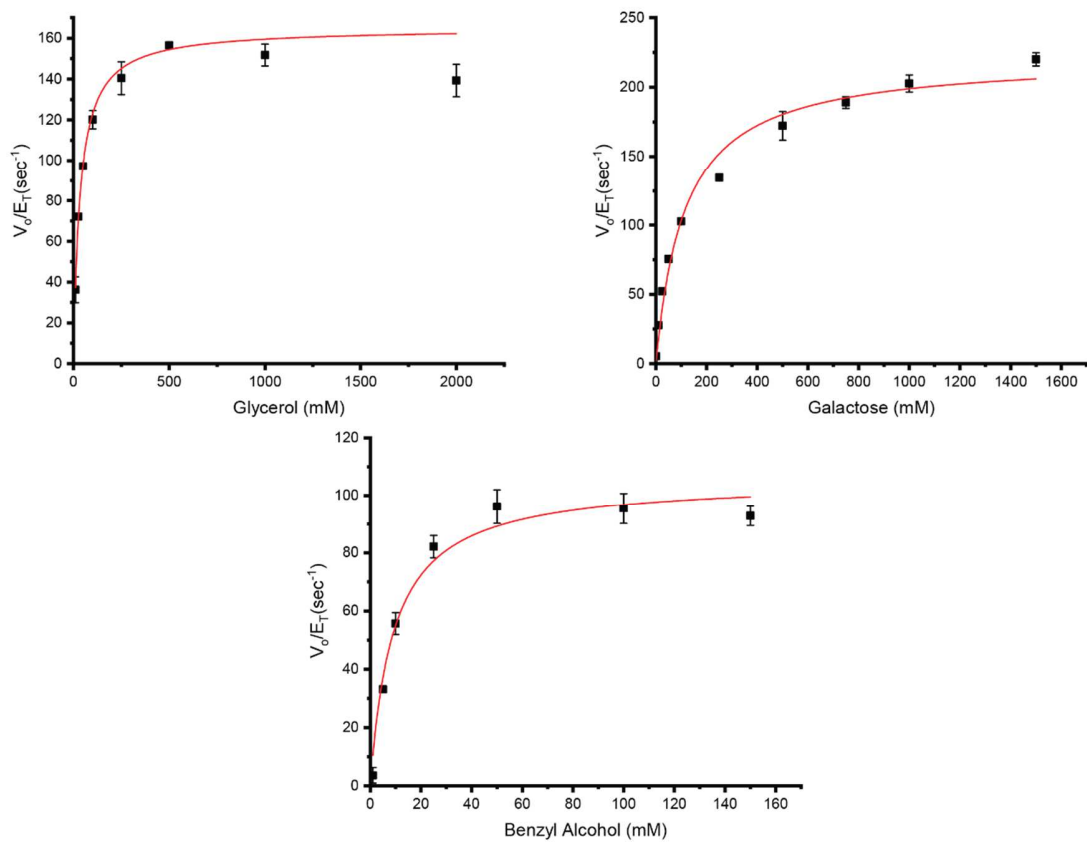

**Figure S14. PruAA5\_2A (PruAlcOx) kinetics.** A. Specific activities. Measurements were performed in triplicate at RT in 100 mM buffer using the HRP/ABTS assay. Activities were monitored using 300 mM for carbohydrates, polyols, diols and primary alcohols, 30 mM for benzyl alcohol and galactitol, 5 mM for methyl glyoxal and glycolaldehyde dimer, 2.5 mM for aryl alcohols and furans. B. Michaelis-Menten kinetics. Initial-rate values were measured in triplicate at each substrate concentration. Error bars represent the standard deviation from the mean values. The individual  $k_{\text{cat}}$  and  $K_{\text{M}}$  values were determined by performing a non-linear fitting analysis of the standard Michaelis-Menten equation to the data using OriginLab 9.55. Individual substrates are indicated in the x-axis labels and the enzyme under study is annotated in each graph.



A.

*FoxAlcOx*

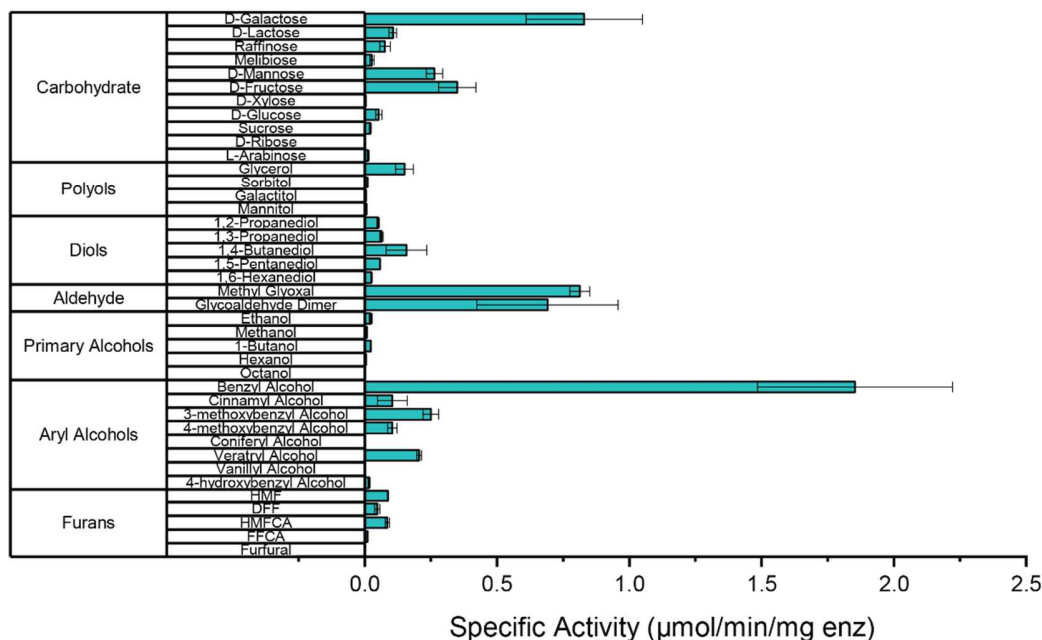

B.

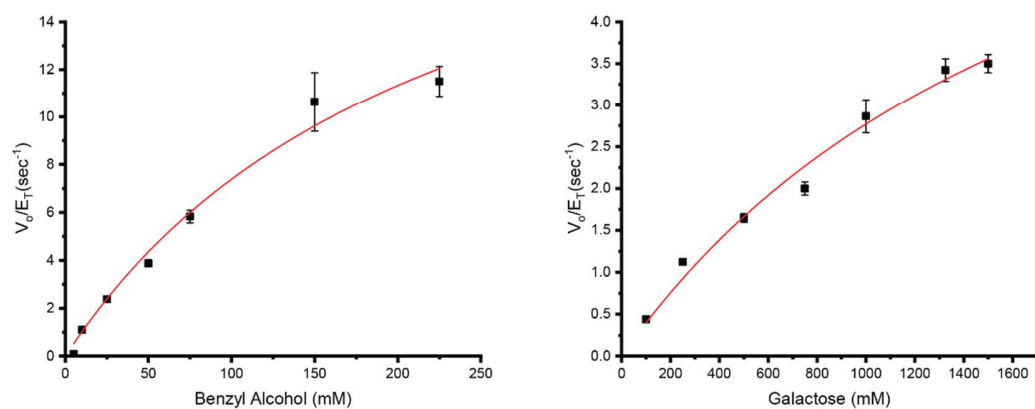

**Figure S15. *FoxAlcOx* kinetics.** A. Specific activities. Measurements were performed in triplicate at RT in 100 mM buffer using the HRP/ABTS assay. Activities were monitored using 300 mM for carbohydrates, polyols, diols and primary alcohols, 30 mM for benzyl alcohol and galactitol, 5 mM for methyl glyoxal and glycolaldehyde dimer, 2.5 mM for aryl alcohols and furans. B. Michaelis-Menten kinetics. Initial-rate values were measured in triplicate at each substrate concentration. Error bars represent the standard deviation from the mean values. The individual  $k_{cat}$  and  $K_M$  values were determined by performing a non-linear fitting analysis of the standard Michaelis-Menten equation to the data using OriginLab 9.55. Individual substrates are indicated in the x-axis labels and the enzyme under study is annotated in each graph.

# A. *PorAlcOx*

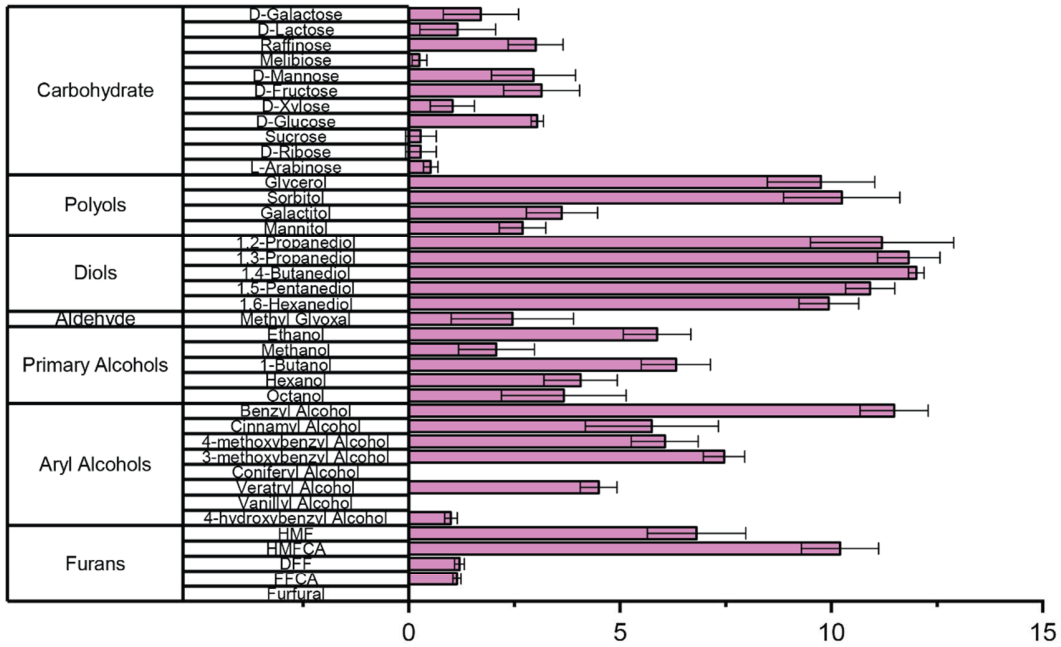

# B. Specific Activity (μmol/min/mg enz)

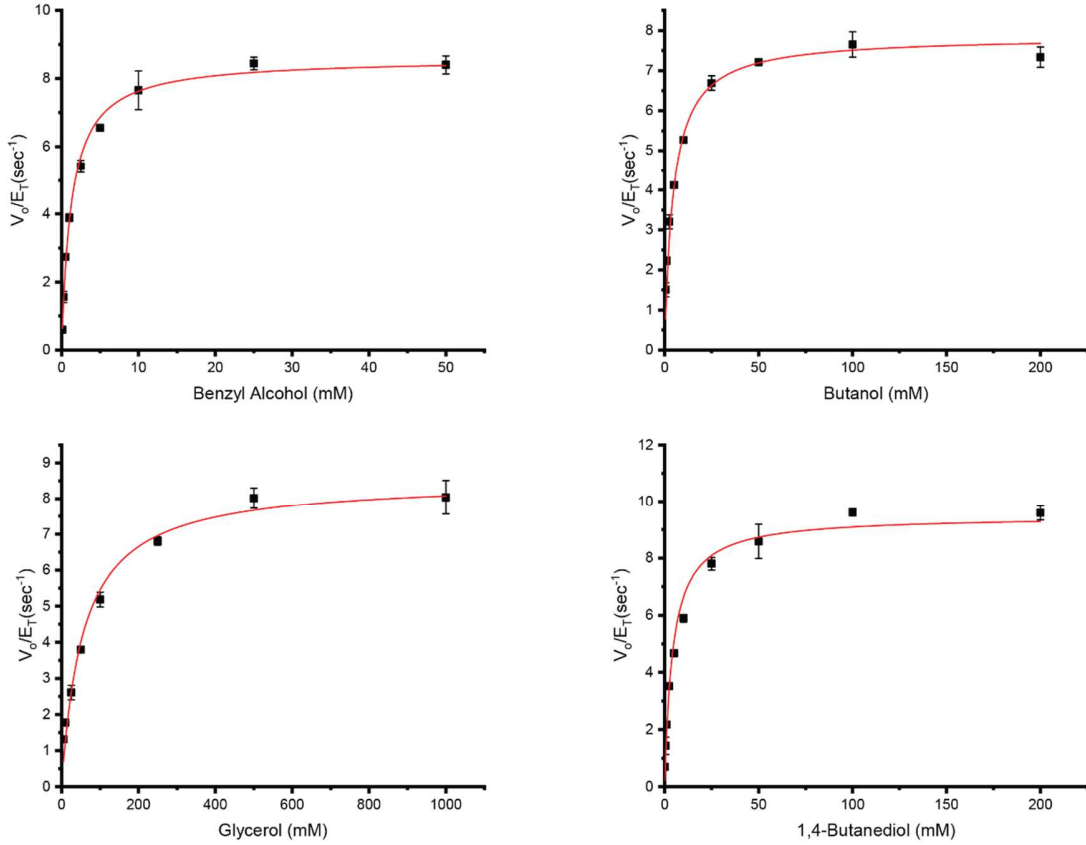

**Figure S16. *PorAlcOx* kinetics.** A. Specific activities. Measurements were performed in triplicate at RT in 100 mM buffer using the HRP/ABTS assay. Activities were monitored using 300 mM for carbohydrates, polyols, diols and primary alcohols, 30 mM for benzyl alcohol and galactitol, 5 mM for methyl glyoxal and glycolaldehyde dimer, 2.5 mM for aryl alcohols and furans. B. Michaelis-Menten kinetics. Initial-rate values were measured in triplicate at each substrate concentration. Error bars represent the standard deviation from the mean values. The individual  $k_{\text{cat}}$  and  $K_{\text{M}}$  values were determined by performing a non-linear fitting analysis of the standard Michaelis-Menten equation to the data using OriginLab 9.55. Individual substrates are indicated in the x-axis labels and the enzyme under study is annotated in each graph.

# A. CglAlcOx

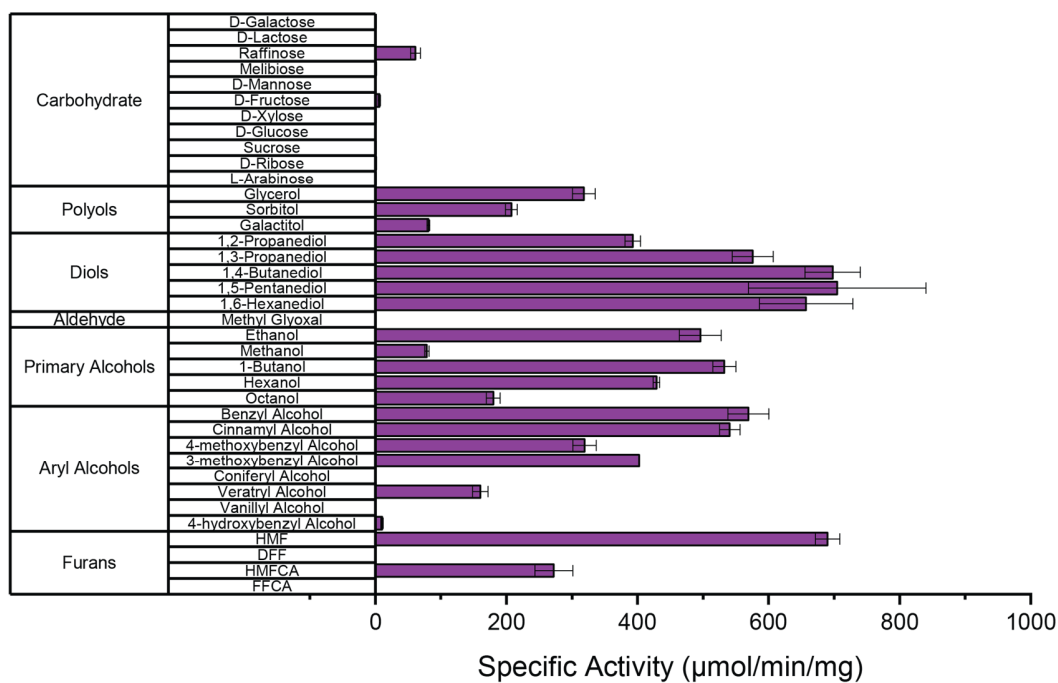

# B.

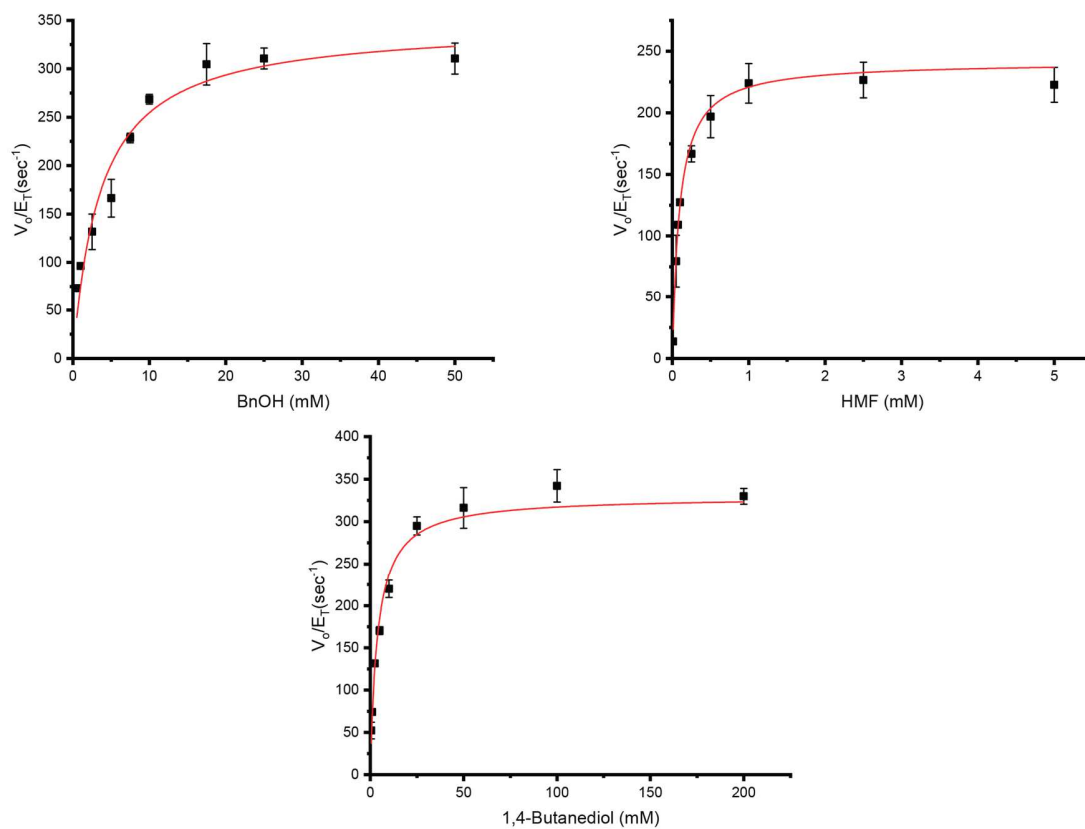

**Figure S17. *CglAlcOx* kinetics.** A. Specific activities. Measurements were performed in triplicate at RT in 100 mM buffer using the HRP/ABTS assay. Activities were monitored using 300 mM for carbohydrates, polyols, diols and primary alcohols, 30 mM for benzyl alcohol and galactitol, 5 mM for methyl glyoxal and glycolaldehyde dimer, 2.5 mM for aryl alcohols and furans. B. Michaelis-Menten kinetics. Initial-rate values were measured in triplicate at each substrate concentration. Error bars represent the standard deviation from the mean values. The individual  $k_{\text{cat}}$  and  $K_{\text{M}}$  values were determined by performing a non-linear fitting analysis of the standard Michaelis-Menten equation to the data using OriginLab 9.55. Individual substrates are indicated in the x-axis labels and the enzyme under study is annotated in each graph.

## A. AsyAlcOx

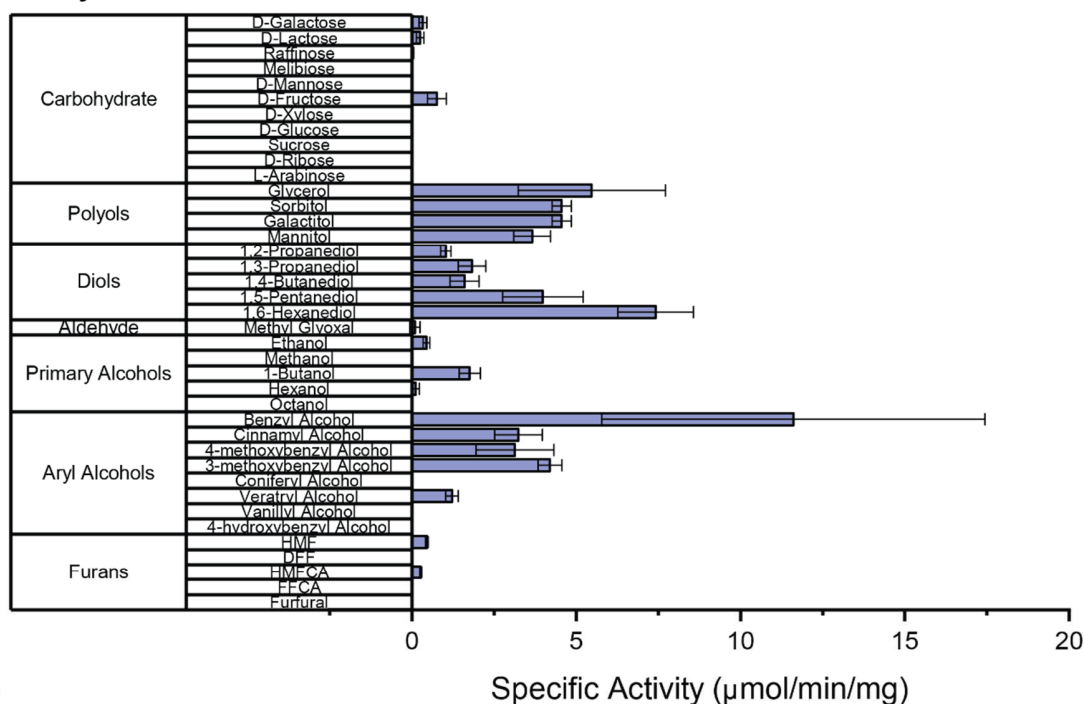

## B.

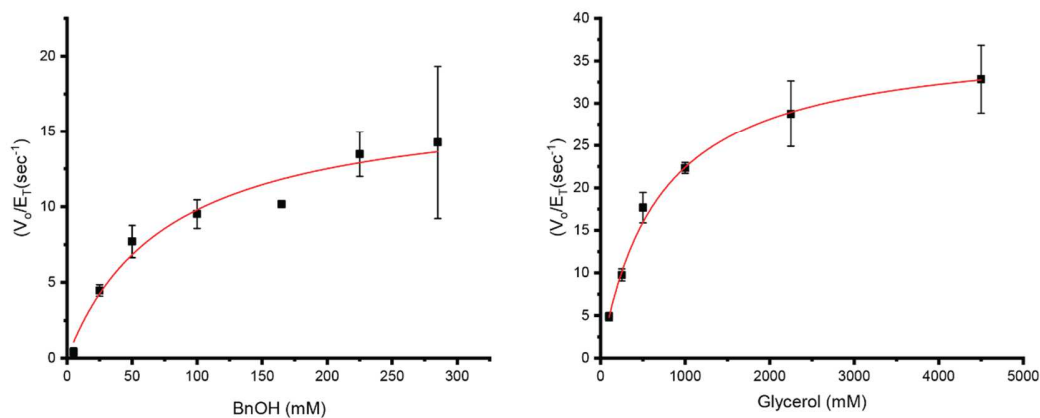

**Figure S18. AsyAlcOx kinetics.** A. Specific activities. Measurements were performed in triplicate at RT in 100 mM buffer using the HRP/ABTS assay. Activities were monitored using 300 mM for carbohydrates, polyols, diols and primary alcohols, 30 mM for benzyl alcohol and galactitol, 5 mM for methyl glyoxal and glycolaldehyde dimer, 2.5 mM for aryl alcohols and furans. B. Michaelis-Menten kinetics. Initial-rate values were measured in triplicate at each substrate concentration. Error bars represent the standard deviation from the mean values. The individual  $k_{cat}$  and  $K_M$  values were determined by performing a non-linear fitting analysis of the standard Michaelis-Menten equation to the data using OriginLab 9.55. Individual substrates are indicated in the x-axis labels and the enzyme under study is annotated in each graph.

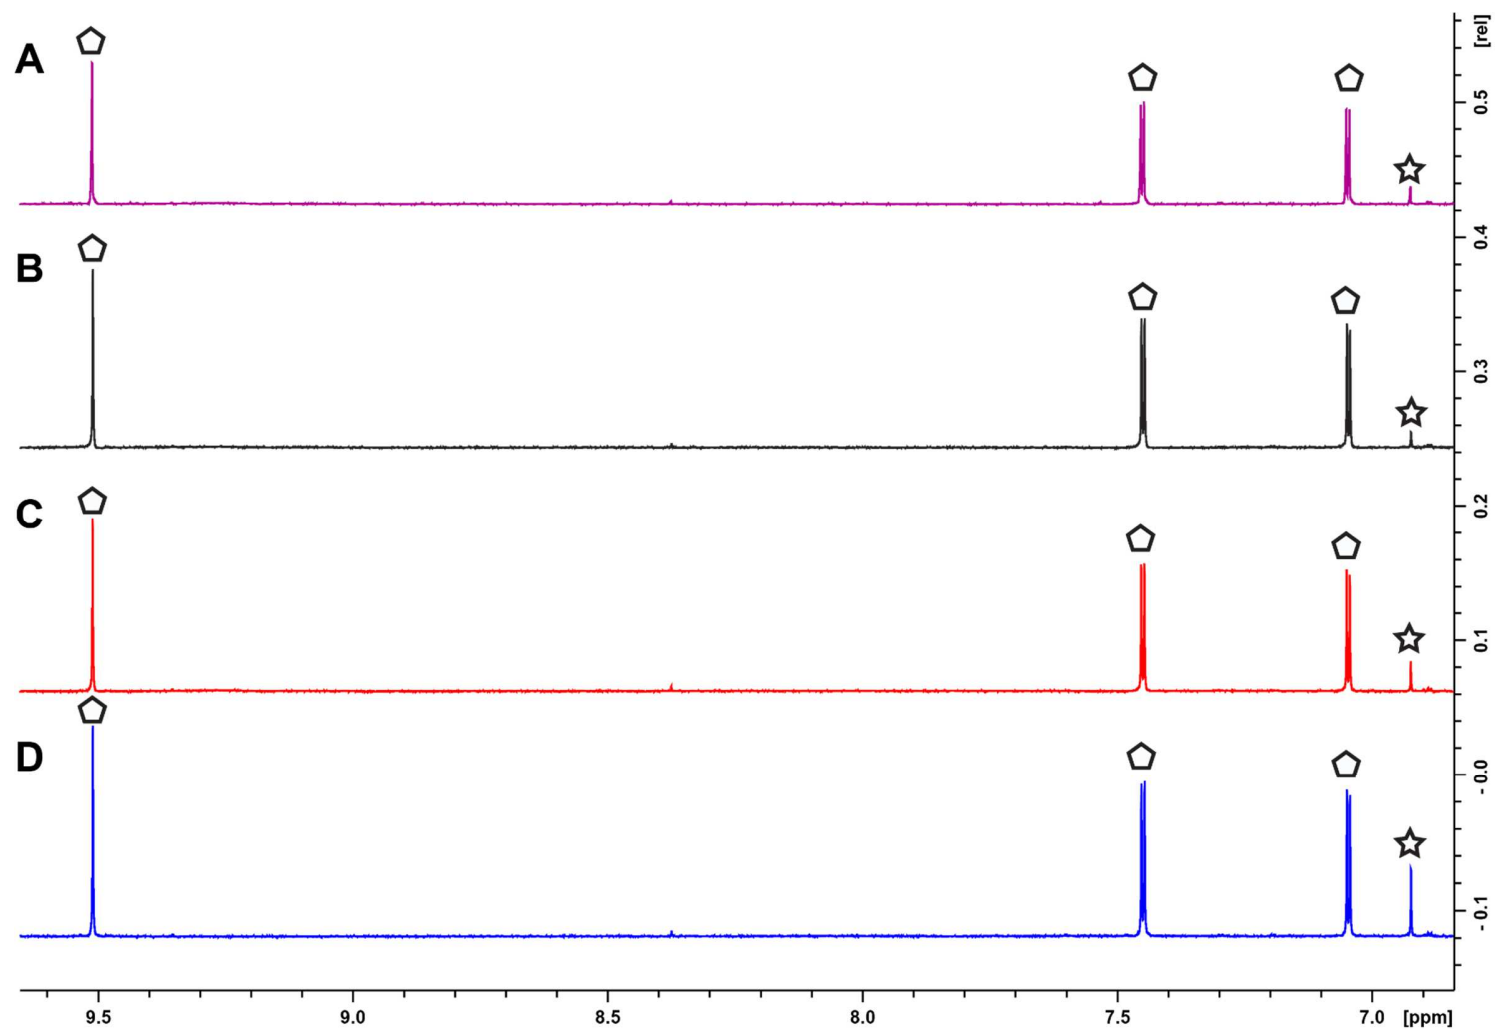

**Figure S19. <sup>1</sup>H-NMR analysis of the oxidation of HMF, HMFCFA, DFF and FFCA by *CglAlcOx*.** A.HMF (magenta); B. HMFCFA (black). C. DFF (red) and D. FFCA (blue). <sup>1</sup>H NMR spectra (600 MHz, 12:1 D<sub>2</sub>O: buffer, 50 mM) of reaction product profiles after 17 h incubation with *CglAlcOx* in the presence of catalase and HRP with 10 mM substrate. Reactions with HMF, HMFCFA and DFF showed full consumption of substrate to produce FFCA (◊) and FDCA (★). Reactions with FFCA (◊) produced partial conversion to FDCA (★).

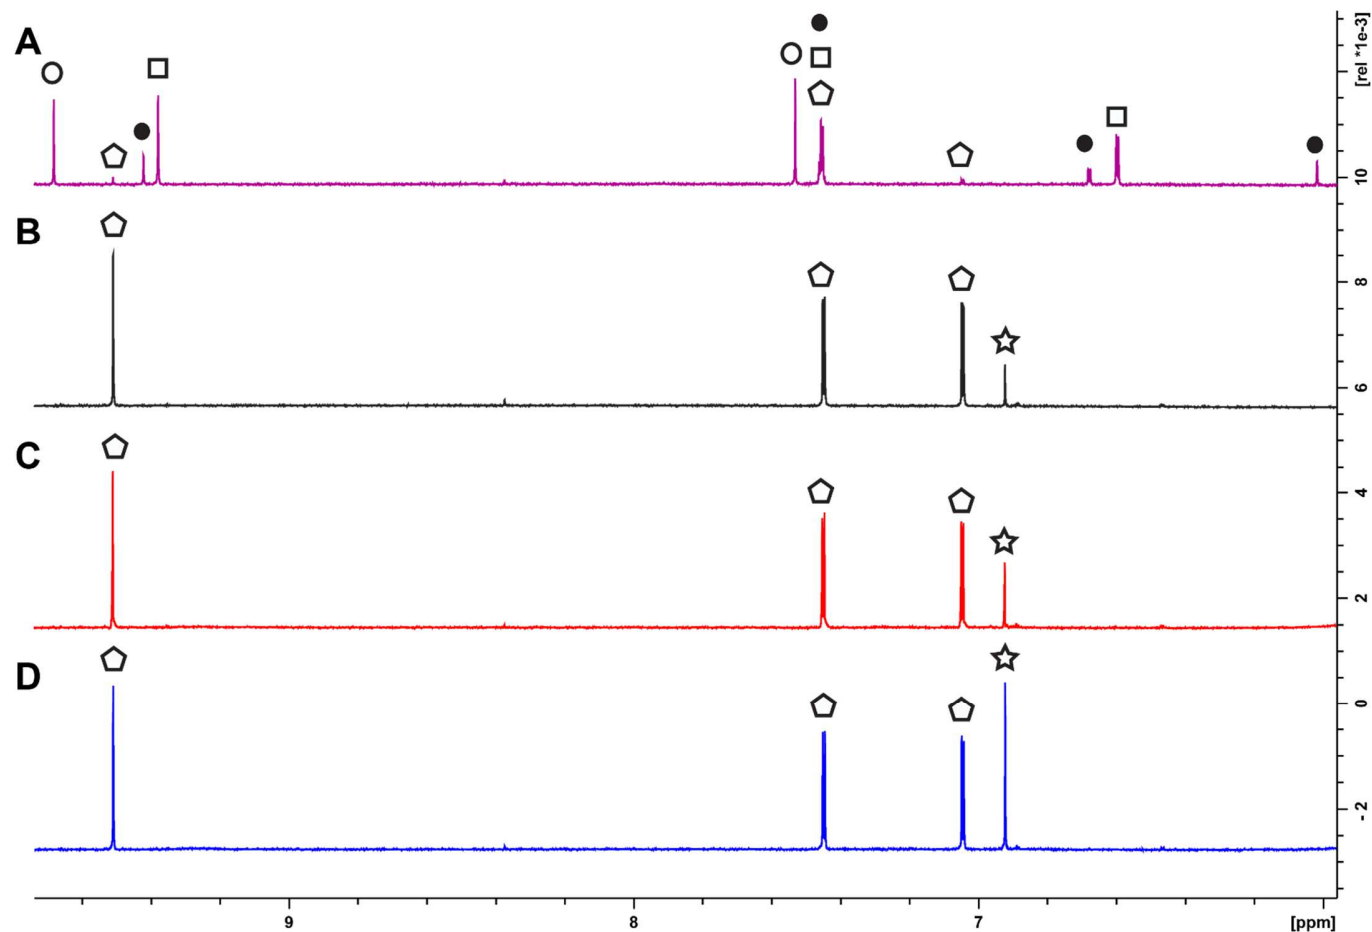

**Figure S20.**  $^1\text{H}$ -NMR analysis of the oxidation of HMF, HMFCFA, DFF and FFCA by *PorAlcOx*. A.HMF (black); B. HMFCFA (blue). C. DFF (red) and D. FFCA (pink).  $^1\text{H}$  NMR spectra (600 MHz, 12:1  $\text{D}_2\text{O}$ : buffer, 50 mM) of reaction product profiles after 17 h incubation with *PorAlcOx* in the presence of catalase and HRP with 10 mM substrate. Reactions with HMF ( $\square$ ) showed 51 % consumption of substrate to DFF ( $\circ$ ) and its hydrate form  $\text{DFF}_{\text{hyd}}$  ( $\bullet$ ) and FFCA ( $\diamond$ ). Reactions with HMFCFA and DFF showed full consumption of substrate to produce FFCA ( $\diamond$ ) and FDCA ( $\star$ ). Reactions with FFCA ( $\diamond$ ) produced partial conversion to FDCA ( $\star$ ).



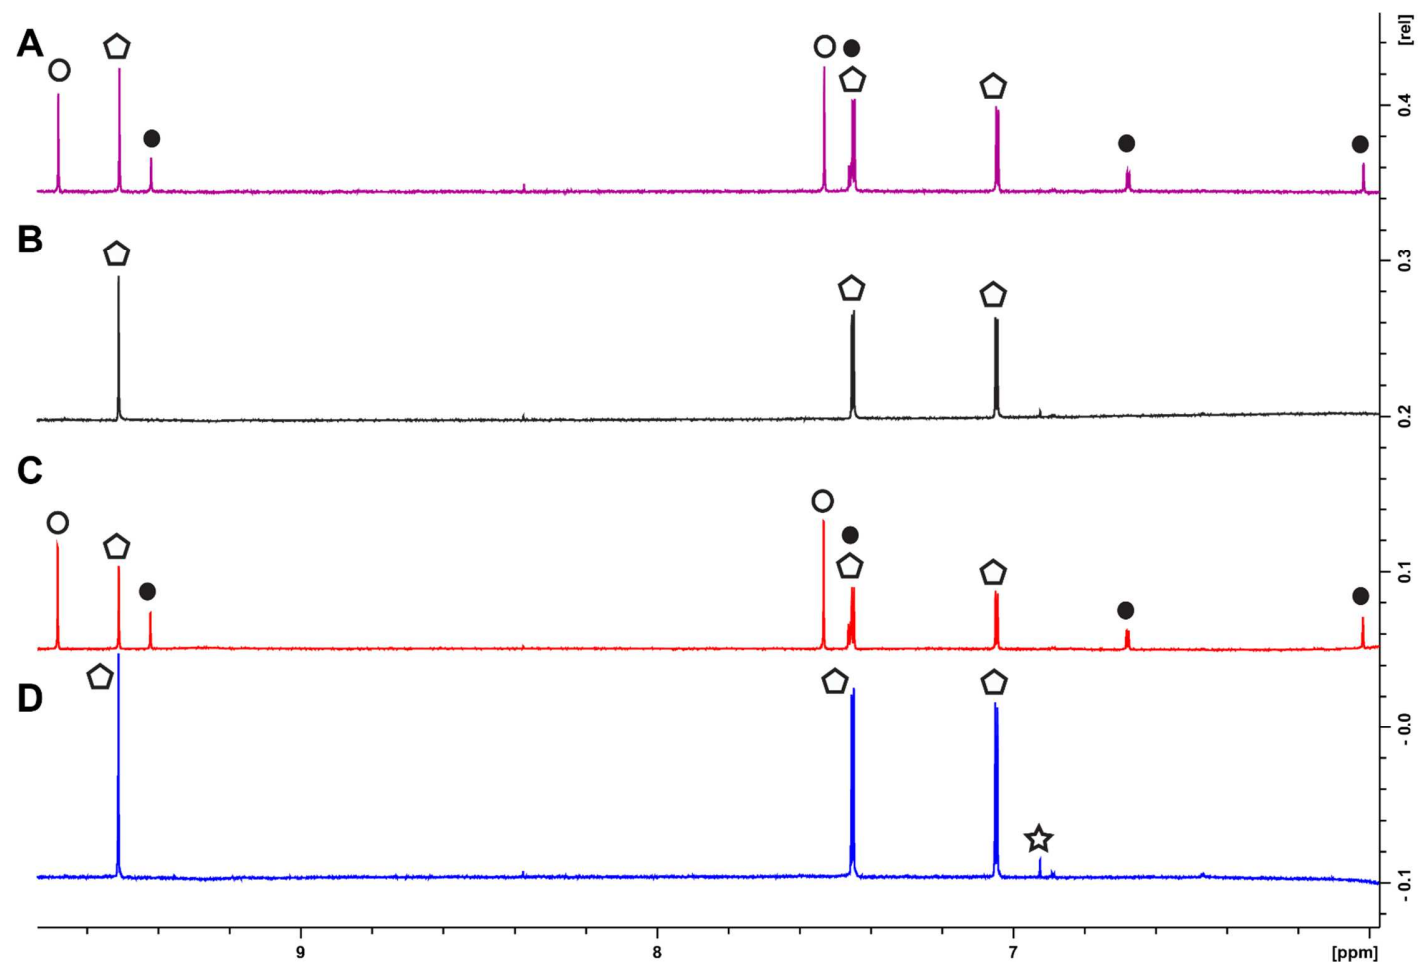

**Figure S21.**  $^1\text{H}$ -NMR analysis of the oxidation of HMF, HMFCA, DFF and FFCA by *PruAA5\_2A* (*PruAlcOx*). A.HMF (black); B. HMFCA (blue). C. DFF (red) and D. FFCA (pink).  $^1\text{H}$  NMR spectra (600 MHz, 12:1  $\text{D}_2\text{O}$ : buffer, 50 mM) of reaction product profiles after 17 h incubation with *PruAA5\_2A*/AlcOx in the presence of catalase and HRP with 10 mM substrate. Reactions with HMF ( $\square$ ) showed 100 % consumption of substrate to DFF ( $\circ$ ) and its hydrate form  $\text{DFF}_{\text{hyd}}$  ( $\bullet$ ) and FFCA ( $\pentagon$ ). Reactions with DFF showed partial conversion to FFCA ( $\pentagon$ ). Reactions with HMFCA show 100 % conversion to FFCA ( $\pentagon$ ) while reactions with FFCA ( $\pentagon$ ) show low conversion to FDCA ( $\star$ ).

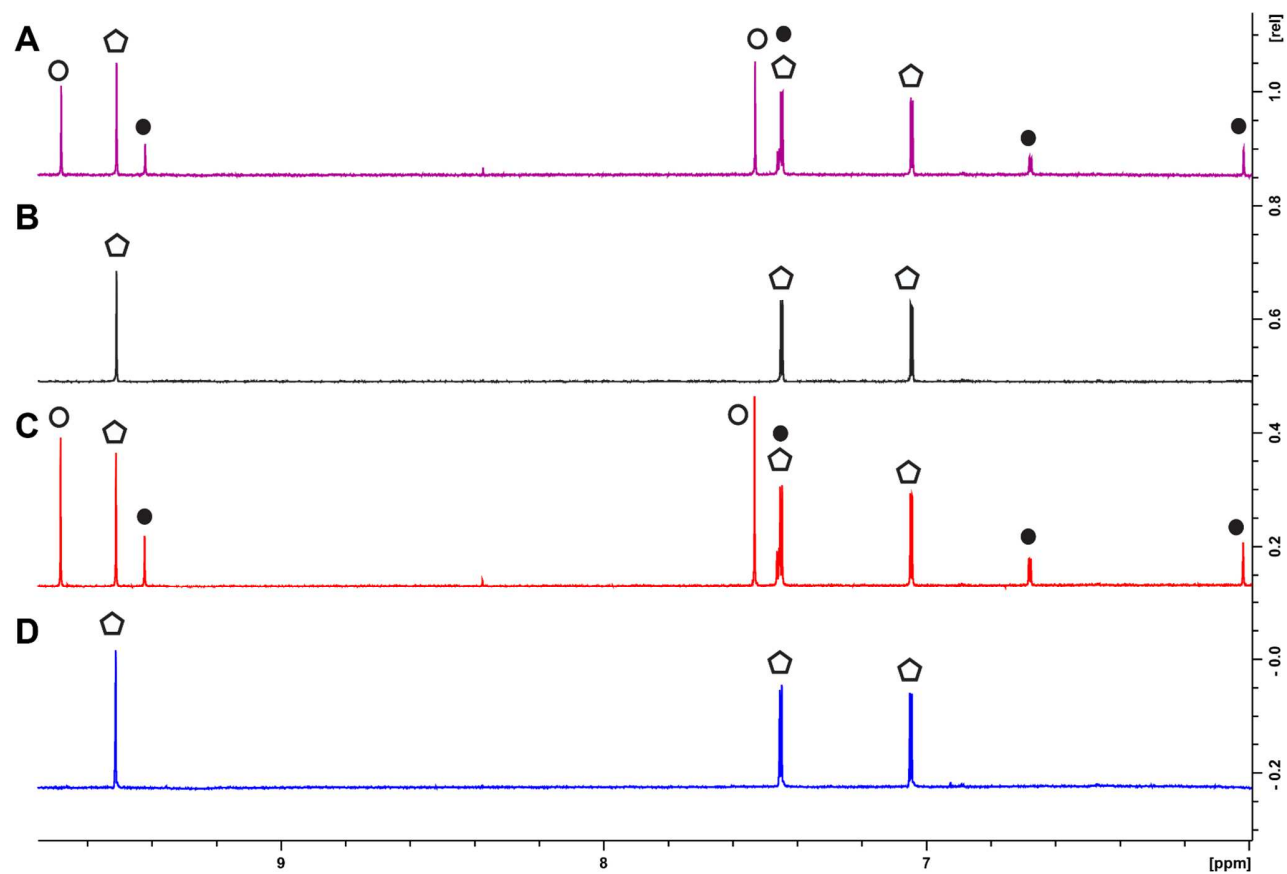

**Figure S22.**  $^1\text{H-NMR}$  analysis of the oxidation of HMF, HMFCFA, DFF and FFCA by *AflAlcOx*. A.HMF (black); B. HMFCFA (blue). C. DFF (red) and D. FFCA (pink).  $^1\text{H NMR}$  spectra (600 MHz, 12:1  $\text{D}_2\text{O}$ : buffer, 50 mM) of reaction product profiles after 17 h incubation with *AflAlcOx* in the presence of catalase and HRP with 10 mM substrate. Reactions with HMF ( $\square$ ) showed 100 % consumption of substrate to DFF ( $\circ$ ) and its hydrate form  $\text{DFF}_{\text{hyd}}$  ( $\bullet$ ) and FFCA ( $\diamond$ ). Reactions with DFF showed partial conversion to FFCA ( $\diamond$ ). Reactions with HMFCFA show 100 % conversion to FFCA ( $\diamond$ ) while reactions with FFCA ( $\diamond$ ) show no conversion.

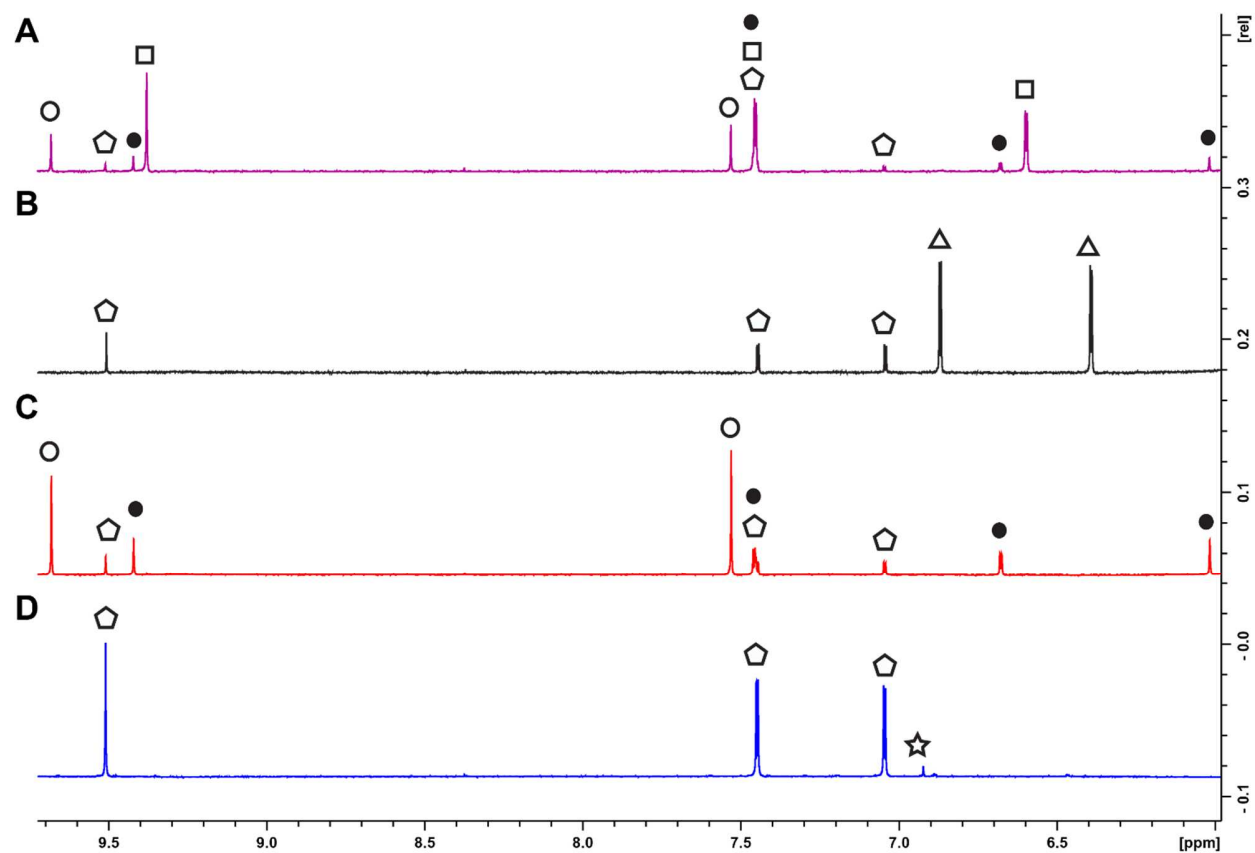

**Figure S23. <sup>1</sup>H-NMR analysis of the oxidation of HMF, HMFCFA, DFF and FFCA by *FoxGalOxB*.** A.HMF (black); B. HMFCFA (blue). C. DFF (red) and D. FFCA (pink). <sup>1</sup>H NMR spectra (600 MHz, 12:1 D<sub>2</sub>O: buffer, 50 mM) of reaction product profiles after 17 h incubation with *FoxGalOxB* in the presence of catalase and HRP with 10 mM substrate. Reactions with HMF (□) showed 62 % consumption of substrate to DFF (○) and its hydrate form DFF<sub>hyd</sub>(●) and FFCA (◇). Reactions with HMFCFA and DFF showed 17 % and 12 %, respectively, consumption of substrate to produce FFCA (◇). Reactions with FFCA (◇) produced partial conversion to FDCA (★).

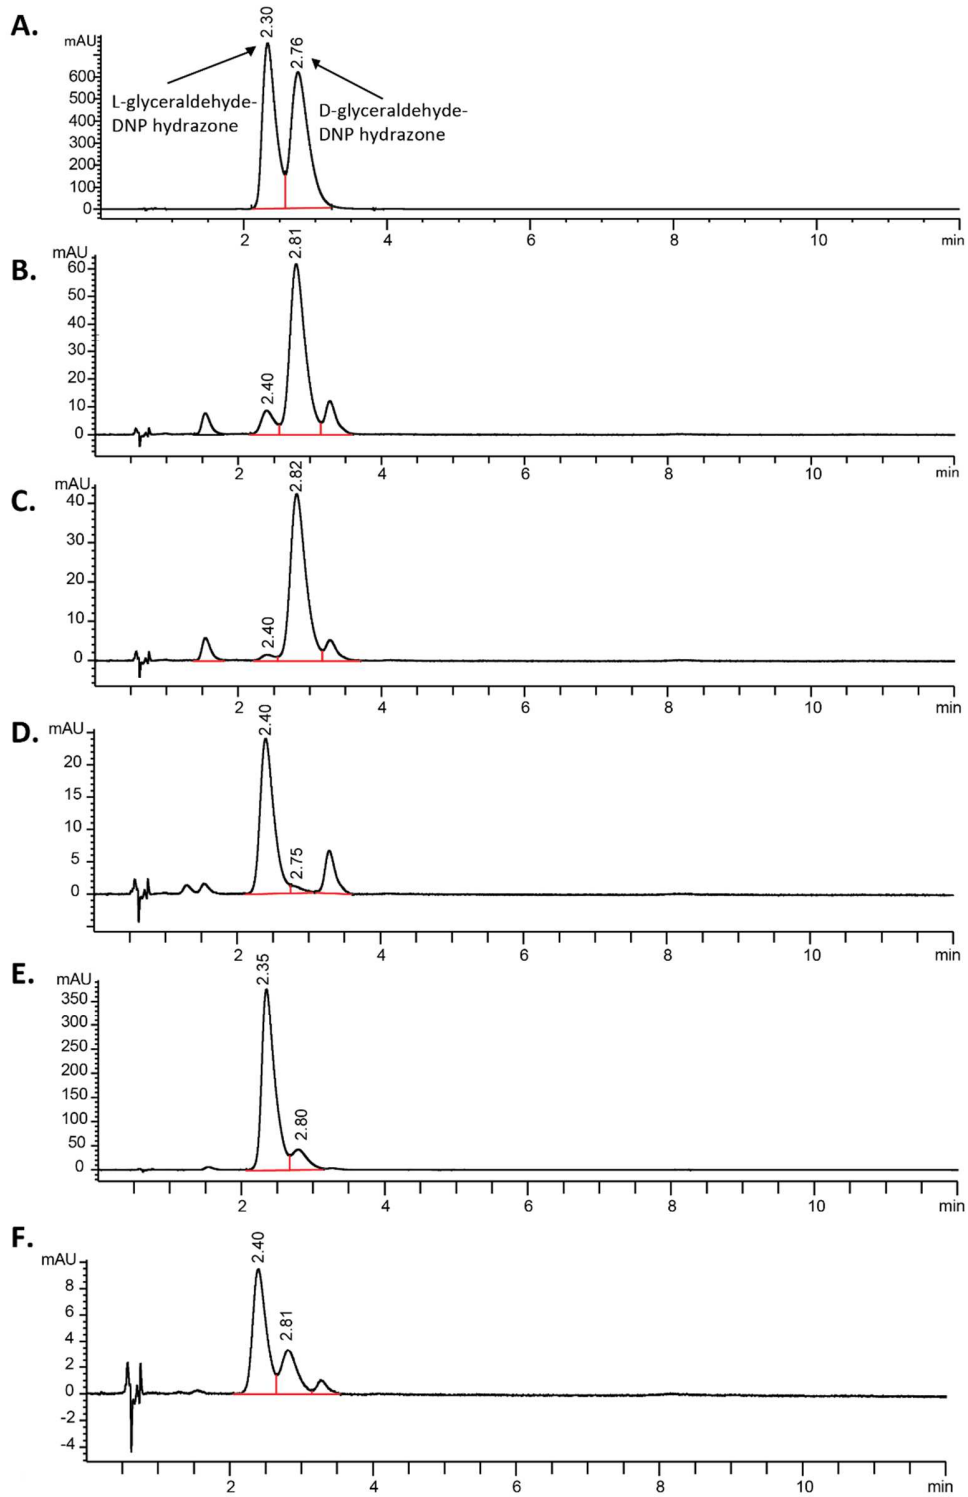

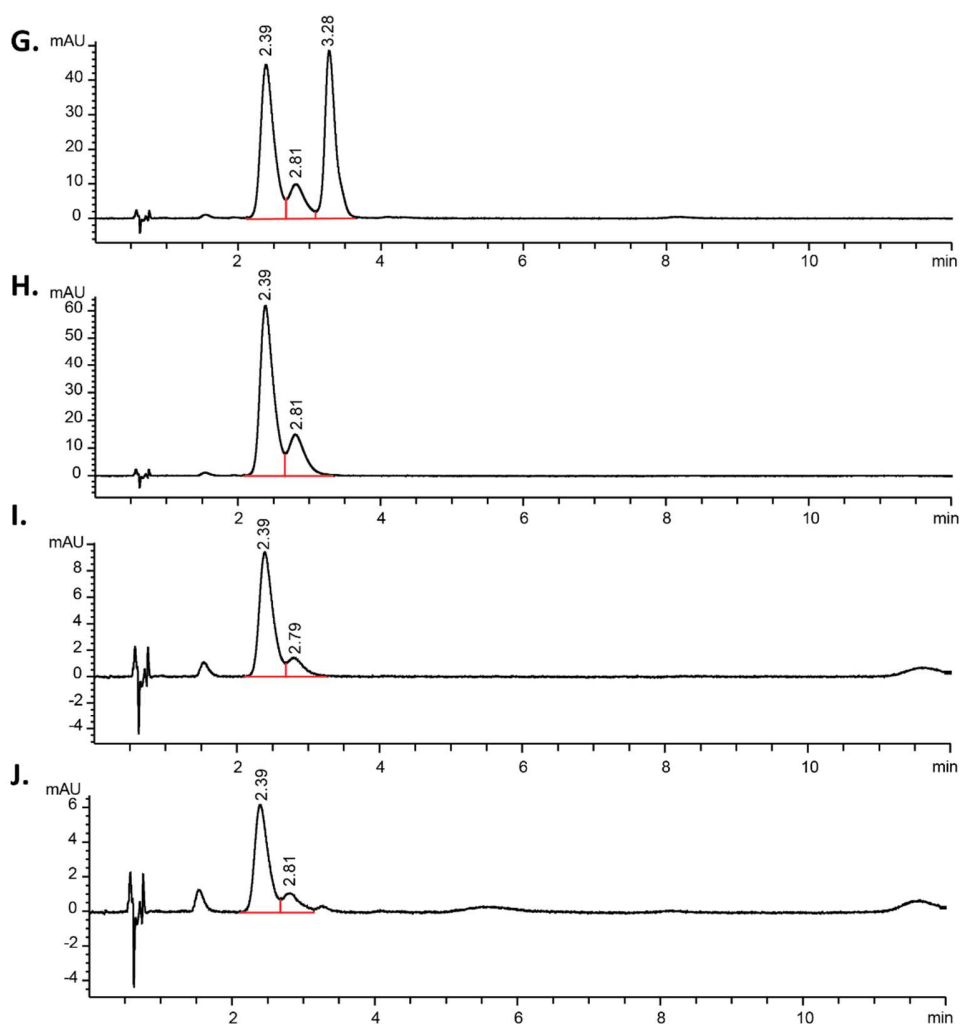

**Figure S24. Stereochemistry determination of glycerol oxidation by *PorAlcOx*, *CglAlcOx*, *PruAA5\_2A* (*PruAlcOx*), *AflAlcOx*, *PfeGalOx*, *FoxGalOxB*, *AsyAlcOx*, *UmaRafOx* and *PhuRafOx*.** A. Chromatogram of *L/D*-glyceraldehyde-hydrazone. B. Glyceraldehyde-hydrazone composition after *PorAlcOx* oxidation of glycerol. C. Glyceraldehyde-hydrazone composition after *CglAlcOx* oxidation of glycerol. D. Glyceraldehyde-hydrazone composition after *PruAA5\_2A* (*PruAlcOx*) oxidation of glycerol. E. Glyceraldehyde-hydrazone composition after *AflAlcOx* oxidation of glycerol. F. Glyceraldehyde-hydrazone composition after *PfeGalOx* oxidation of glycerol. G. Glyceraldehyde-hydrazone composition after *FoxGalOxB* oxidation of glycerol. H. Glyceraldehyde-hydrazone composition after *AsyAlcOx* oxidation of glycerol. I. Glyceraldehyde-hydrazone composition after *UmaRafOx* oxidation of glycerol. J. Glyceraldehyde-hydrazone composition after *PhuRafOx* oxidation of glycerol. Peaks are labelled with retention times.

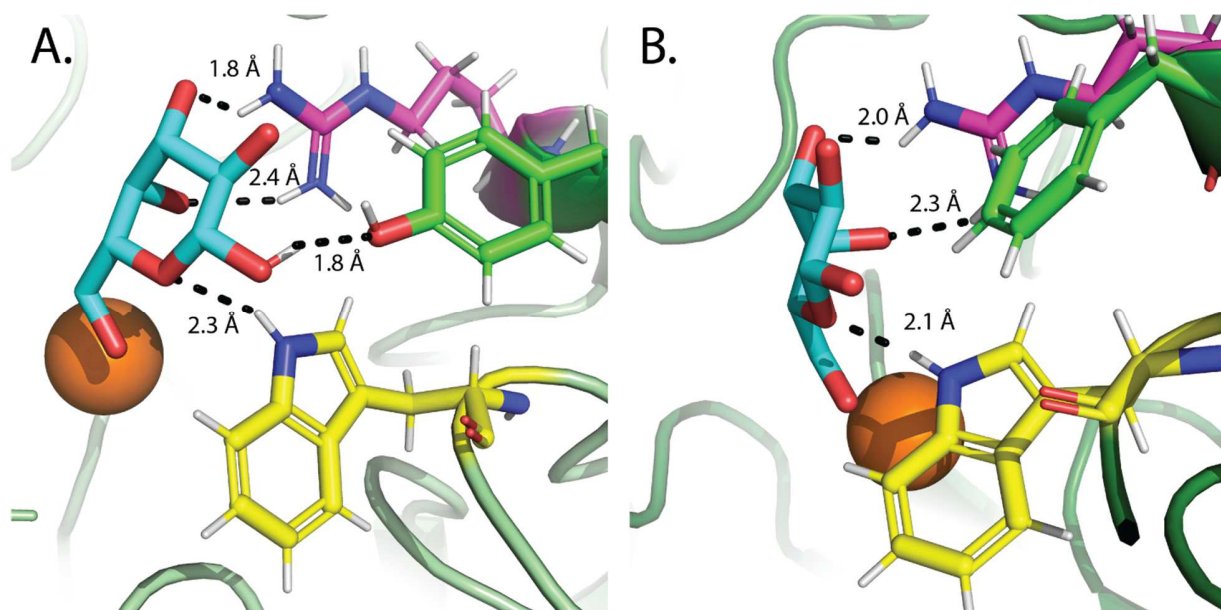

**Figure S25. Molecular docking of galactose (cyan) in *FgrGalOx* (PDB ID 1GOF)[13] (A) and Phyre2 homology models of *ExeGalOx* (B) using AutoDock Vina as implemented in Chimera. The copper atom is depicted as a dark orange sphere, while W290, Y329/F329, and R330 are depicted as yellow, green and magenta sticks respectively. Interactions with the docked substrate, are indicated in black.**

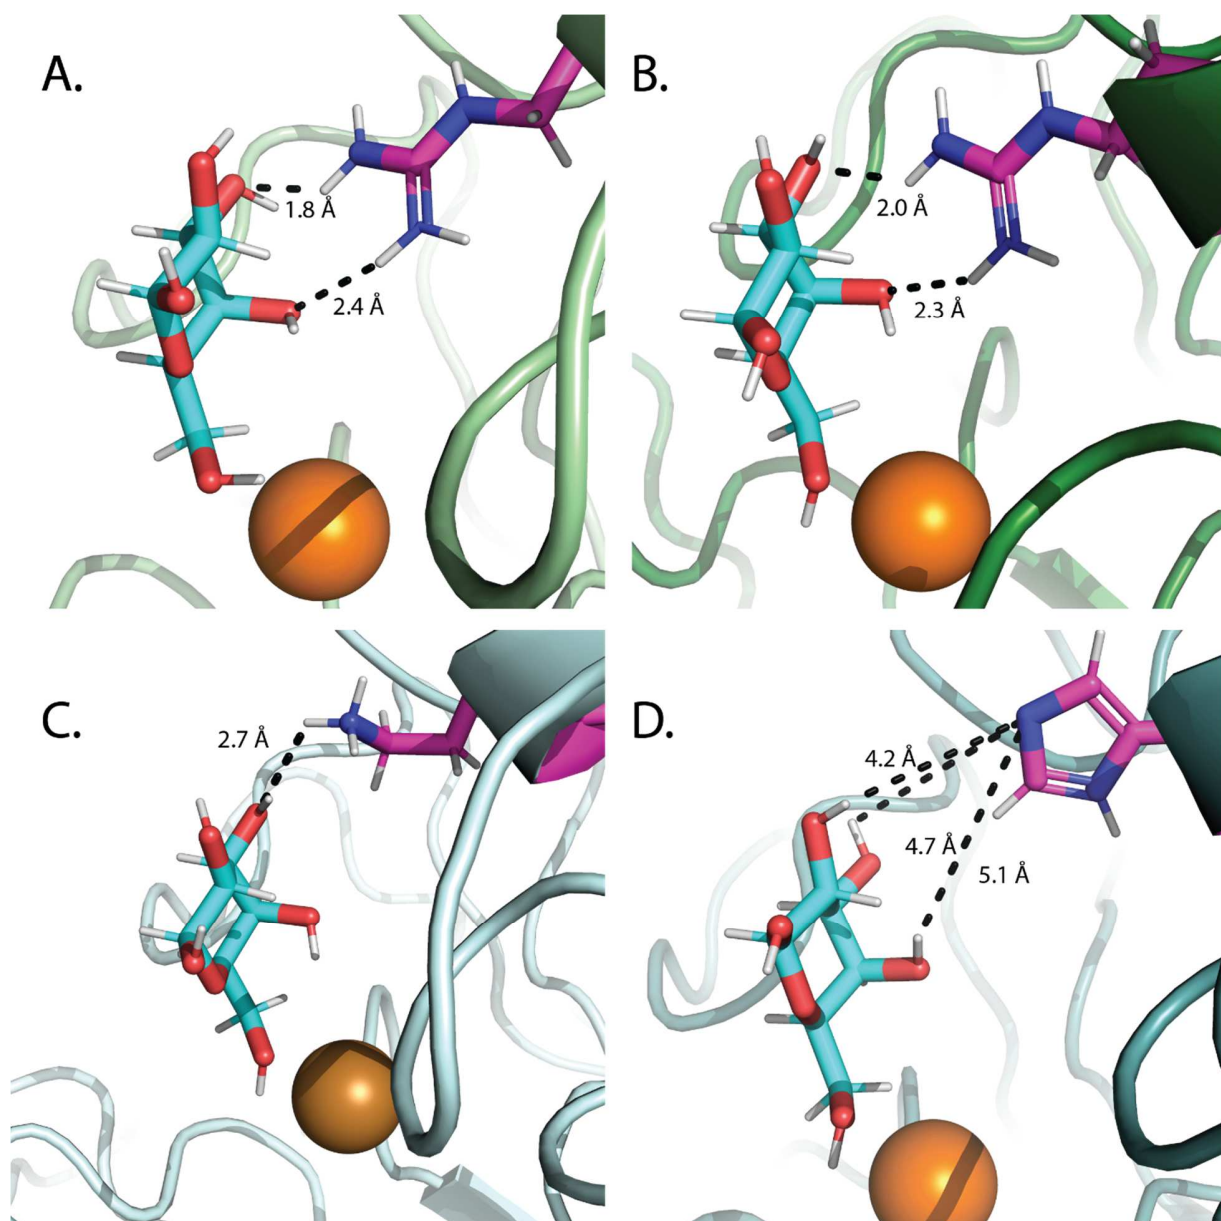

**Figure S26. Molecular docking of galactose (cyan) in *FgrGalOx* (PDB ID 1GOF)[13] (A) and Phyre2 homology models of *ExeGalOx* (B), *FoxAlcOx* (C) and *AflAlcOx* (D) using AutoDock Vina as implemented in Chimera. The copper atom is depicted as a dark orange sphere, while R330/K330/H330 are depicted as magenta sticks. Interactions with the docked substrate, are indicated in black.**

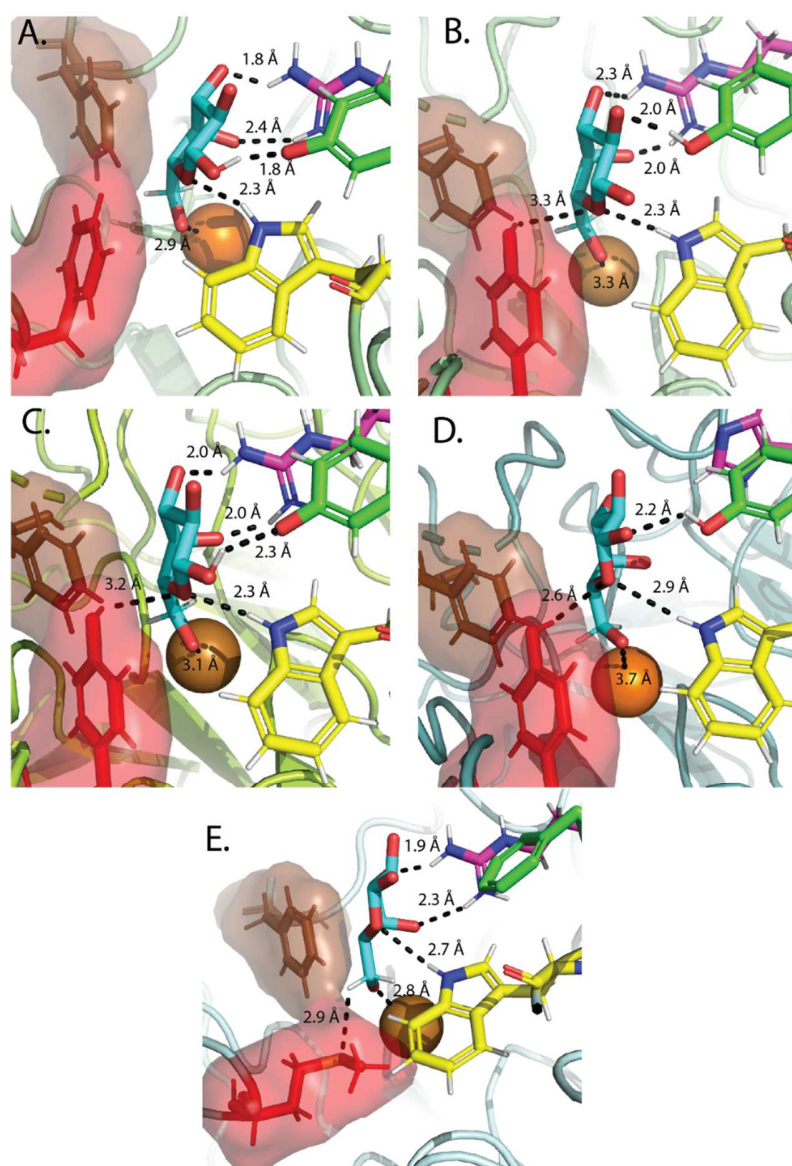

**Figure S27. Molecular docking of galactose (cyan) in *FgrGalOx* (PDB ID 1GOF)[13] (A) and Phyre2 homology models of *PfeGalOx* (B), *PruAlcOx* (C), *AflAlcOx* (D) and *FoxGalOxB* (E) using AutoDock Vina as implemented in Chimera. The copper atom is depicted as a dark orange sphere, while W290, Y329, R330/H330, F494 and F194 are depicted as yellow, green, magenta, brown and red sticks respectively, including surface representation for F194 and F464. Interactions with the docked substrate, are indicated in black.**



## Supplemental References

1. Deacon SE, Mahmoud K, Spooner RK, Firbank SJ, Knowles PF, Phillips SEV, McPherson MJ. Enhanced Fructose Oxidase Activity in a Galactose Oxidase Variant. *ChemBioChem*. 2004;5(7):972-9. <https://doi.org/10.1002/cbic.200300810>
2. Sun L, Petrounia IP, Yagasaki M, Bandara G, Arnold FH. Expression and stabilization of galactose oxidase in *Escherichia coli* by directed evolution. *Protein Eng, Des Sel*. 2001;14(9):699-704. <https://doi.org/10.1093/protein/14.9.699>
3. Escalettes F, Turner NJ. Directed Evolution of Galactose Oxidase: Generation of Enantioselective Secondary Alcohol Oxidases. *ChemBioChem*. 2008;9(6):857-60. <https://doi.org/10.1002/cbic.200700689>
4. Deacon SE, McPherson MJ. Enhanced Expression and Purification of Fungal Galactose Oxidase in *Escherichia coli* and Use for Analysis of a Saturation Mutagenesis Library. *ChemBioChem*. 2011;12(4):593-601. <https://doi.org/10.1002/cbic.201000634>
5. Mathieu Y, Offen WA, Forget SM, Ciano L, Viborg AH, Blagova E, Henrissat B, Walton PH, Davies GJ, Brumer H. Discovery of a Fungal Copper Radical Oxidase with High Catalytic Efficiency toward 5-Hydroxymethylfurfural and Benzyl Alcohols for Bioprocessing. *ACS Catal*. 2020;10(5):3042-58. <https://doi.org/10.1021/acscatal.9b04727>
6. Cleveland M, Lafond M, Xia FR, Chung R, Mulyk P, Hein J, Brumer H. Two *Fusarium* Copper Radical Oxidases with High Activity on Aryl Alcohols. *Biotechnol Biofuels*. 2021;"in revision".
7. Whittaker MM, Whittaker JW. Catalytic Reaction Profile for Alcohol Oxidation by Galactose Oxidase. *Biochemistry*. 2001;40(24):7140-8. <https://doi.org/10.1021/bi010303l>
8. Yin D, Urresti S, Lafond M, Johnston EM, Derikvand F, Ciano L, Berrin J-G, Henrissat B, Walton PH, Davies GJ, Brumer H. Structure–function characterization reveals new catalytic diversity in the galactose oxidase and glyoxal oxidase family. *Nat Commun*. 2015;6(1):10197. <https://doi.org/10.1038/ncomms10197>
9. Dijkman WP, Fraaije MW. Discovery and Characterization of a 5-Hydroxymethylfurfural Oxidase from *Methylovorus* sp. Strain MP688. *Appl Environ Microbiol*. 2014;80(3):1082-90. <https://doi.org/10.1128/AEM.03740-13>
10. Carro J, Ferreira P, Rodríguez L, Prieto A, Serrano A, Balcells B, Ardá A, Jiménez-Barbero J, Gutiérrez A, Ullrich R, Hofrichter M, Martínez AT. 5-hydroxymethylfurfural conversion by fungal aryl-alcohol oxidase and unspecific peroxxygenase. *FEBS J*. 2015;282(16):3218-29. <https://doi.org/10.1111/febs.13177>
11. Kadowaki MAS, Godoy M, Kumagai PS, Costa-Filho AJd, Mort A, Prade RA, Polikarpov I. Characterization of a New Glyoxal Oxidase from the Thermophilic Fungus *Myceliophthora thermophila* M77: Hydrogen Peroxide Production Retained in 5-Hydroxymethylfurfural Oxidation. *Catalysts*. 2018;8(10):476. <https://doi.org/10.3390/catal8100476>
12. Daou M, Yassine B, Wikee S, Record E, Duprat F, Bertrand E, Faulds CB. *Pycnoporus cinnabarinus* glyoxal oxidases display differential catalytic efficiencies on 5-hydroxymethylfurfural and its oxidized derivatives. *Fungal Biol Biotechnol*. 2019;6(1):4. <https://doi.org/10.1186/s40694-019-0067-8>
13. Ito N, Phillips SEV, Yadav KDS, Knowles PF. Crystal Structure of a Free Radical Enzyme, Galactose Oxidase. *J Mol Biol*. 1994;238(5):794-814. <https://doi.org/10.1006/jmbi.1994.1335>
